# Supplementary material for: Based on Transcriptome Sequencing: Clinicians Need to Pay Attention to Fever Caused by Common Respiratory Pathogens During the Global Outbreak of COVID-19
Source: Research Square preprint supplement (doi:10.21203/rs.3.rs-490705/v2), 2021-07-02
Supplement: Supplementary file 1 [file 205f5be9d5cc96e0c5c73b4b.xlsx]

## Sheet: Sheet1
Filter condition	File number	position	ref	alt	dep	freq			Filter condition	File number	position	ref	alt	dep	freq
awk '$NF<0.5 && $NF>=0.05 && $6>5'	209001902R	106	C	T	9	0.0789474			ls 209001*/20*/mpileup_somatic_0.005.vcf|while read a;do awk '$NF<0.95 && $NF>0.05 && $6>5' $a;done|grep -vE "#"|le	209001889R	22522	C	T	16	0.695652
		3340	G	T	16	0.0924855				209001902R	106	C	T	9	0.0789474
		3621	G	A	12	0.0508475					3340	G	T	16	0.0924855
		4114	T	C	9	0.0642857					3621	G	A	12	0.0508475
		8788	T	G	8	0.0672269					4114	T	C	9	0.0642857
		10489	T	C	6	0.05					8788	T	G	8	0.0672269
		10907	G	C	7	0.0530303					10907	G	C	7	0.0530303
		11655	T	C	7	0.0972222					11655	T	C	7	0.0972222
		12792	A	G	7	0.059322					12792	A	G	7	0.059322
		13608	C	T	6	0.0810811					13608	C	T	6	0.0810811
		14717	A	C	6	0.0882353					14717	A	C	6	0.0882353
		15682	T	A	6	0.107143					15682	T	A	6	0.107143
		15685	T	A	6	0.117647					15685	T	A	6	0.117647
		16215	C	T	9	0.12					16215	C	T	9	0.12
		16456	T	C	7	0.0833333					16456	T	C	7	0.0833333
		17024	C	T	6	0.122449					17024	C	T	6	0.122449
		18842	A	T	8	0.117647					18842	A	T	8	0.117647
		18928	C	T	6	0.0508475					18928	C	T	6	0.0508475
		20503	A	G	6	0.153846					20503	A	G	6	0.153846
		23100	T	C	8	0.123077					23100	T	C	8	0.123077
		23242	G	T	6	0.0545455					23242	G	T	6	0.0545455
		23602	T	C	12	0.0902256					23602	T	C	12	0.0902256
		23665	A	G	9	0.109756					23665	A	G	9	0.109756
		26390	T	C	6	0.0821918					26390	T	C	6	0.0821918
		27258	G	A	8	0.097561					27258	G	A	8	0.097561
		27687	T	C	9	0.0703125					27687	T	C	9	0.0703125
		18653	G	C	7	0.14				209001904R	11502	G	T	7	0.125
		28363	A	G	7	0.0744681					18653	G	C	7	0.14
	209001908R	10128	C	T	6	0.272727					28363	A	G	7	0.0744681
		10134	T	C	8	0.296296				209001908R	10128	C	T	6	0.272727
		13210	T	A	11	0.268293					10134	T	C	8	0.296296
		24796	T	C	7	0.189189					13210	T	A	11	0.268293
		25422	T	C	7	0.162791					17535	T	C	7	0.5
		26935	T	C	7	0.2					24796	T	C	7	0.189189
		27929	T	C	7	0.189189					25422	T	C	7	0.162791
		28745	G	C	7	0.0744681					26935	T	C	7	0.2
		28815	A	T	7	0.0921053					27929	T	C	7	0.189189
		29010	T	C	7	0.118644					28745	G	C	7	0.0744681
		29128	T	A	7	0.0909091					28815	A	T	7	0.0921053
		29626	T	C	8	0.195122					29010	T	C	7	0.118644
											29128	T	A	7	0.0909091
											29626	T	C	8	0.195122
