# Supplementary material for: Based on Transcriptome Sequencing: Clinicians Need to Pay Attention to Fever Caused by Common Respiratory Pathogens During the Global Outbreak of COVID-19
Source: Research Square preprint supplement (doi:10.21203/rs.3.rs-490705/v2), 2021-07-02
Supplement: Supplementary file 2 [file 740c4b6ca48c4f9620aa6bd3.xlsx]

## Sheet: Raw dada
209001887R		209001888R		209001889R		209001890R		209001891R		209001892R		209001893R		209001894R		209001895R		209001896R		209001897R		209001898R		209001899R		209001900R		209001901R		209001902R		209001903R		209001904R		209001905R		209001906R		209001907R		209001908R		209001909R		209001910R		209001911R
NC_045512.2_Wuhan_seafood_market_pneumonia_virus_isolate_Wuhan-Hu-1,cg	3678	NC_045512.2_Wuhan_seafood_market_pneumonia_virus_isolate_Wuhan-Hu-1,cg	1557	NC_045512.2_Wuhan_seafood_market_pneumonia_virus_isolate_Wuhan-Hu-1,cg	4876	AF440570.1_Shrimp_white_spot_syndrome_virus,cg	164	NC_024310.1_Cynoglossus_semilaevis_isolate_Cse_v1.0_chromosome_4,_Cse_v1.0,wgss	21	NC_045512.2_Wuhan_seafood_market_pneumonia_virus_isolate_Wuhan-Hu-1,cg	5	NC_045512.2_Wuhan_seafood_market_pneumonia_virus_isolate_Wuhan-Hu-1,cg	418	KY249660.1_Human_respiratory_syncytial_virus_B_isolate_RSVB/England583/2013,cg	163	NC_045512.2_Wuhan_seafood_market_pneumonia_virus_isolate_Wuhan-Hu-1,cg	47	NW_007592389.1_Cynoglossus_semilaevis_isolate_Cse_v1.0_unplaced_genomic_scaffold,_Cse_v1.0_scaffold6853,wgss	1192	NC_045512.2_Wuhan_seafood_market_pneumonia_virus_isolate_Wuhan-Hu-1,cg	815	NW_007592389.1_Cynoglossus_semilaevis_isolate_Cse_v1.0_unplaced_genomic_scaffold,_Cse_v1.0_scaffold6853,wgss	1091	NW_007587064.1_Cynoglossus_semilaevis_isolate_Cse_v1.0_unplaced_genomic_scaffold,_Cse_v1.0_scaffold5878,wgss	817	NW_007592389.1_Cynoglossus_semilaevis_isolate_Cse_v1.0_unplaced_genomic_scaffold,_Cse_v1.0_scaffold6853,wgss	1946	NW_007592389.1_Cynoglossus_semilaevis_isolate_Cse_v1.0_unplaced_genomic_scaffold,_Cse_v1.0_scaffold6853,wgss	159	NC_045512.2_Wuhan_seafood_market_pneumonia_virus_isolate_Wuhan-Hu-1,cg	27447	NC_045512.2_Wuhan_seafood_market_pneumonia_virus_isolate_Wuhan-Hu-1,cg	2616	NC_045512.2_Wuhan_seafood_market_pneumonia_virus_isolate_Wuhan-Hu-1,cg	7258	NC_045512.2_Wuhan_seafood_market_pneumonia_virus_isolate_Wuhan-Hu-1,cg	449	NW_007592389.1_Cynoglossus_semilaevis_isolate_Cse_v1.0_unplaced_genomic_scaffold,_Cse_v1.0_scaffold6853,wgss	7651	NW_007592389.1_Cynoglossus_semilaevis_isolate_Cse_v1.0_unplaced_genomic_scaffold,_Cse_v1.0_scaffold6853,wgss	284	NC_045512.2_Wuhan_seafood_market_pneumonia_virus_isolate_Wuhan-Hu-1,cg	3079	NC_045512.2_Wuhan_seafood_market_pneumonia_virus_isolate_Wuhan-Hu-1,cg	8590	NW_007592389.1_Cynoglossus_semilaevis_isolate_Cse_v1.0_unplaced_genomic_scaffold,_Cse_v1.0_scaffold6853,wgss	7421	NW_007592389.1_Cynoglossus_semilaevis_isolate_Cse_v1.0_unplaced_genomic_scaffold,_Cse_v1.0_scaffold6853,wgss	92
NW_007592389.1_Cynoglossus_semilaevis_isolate_Cse_v1.0_unplaced_genomic_scaffold,_Cse_v1.0_scaffold6853,wgss	35	NW_007592389.1_Cynoglossus_semilaevis_isolate_Cse_v1.0_unplaced_genomic_scaffold,_Cse_v1.0_scaffold6853,wgss	23	NW_007592389.1_Cynoglossus_semilaevis_isolate_Cse_v1.0_unplaced_genomic_scaffold,_Cse_v1.0_scaffold6853,wgss	264	U16304.1_Citrus_tristeza_virus_complete_genome	49	KY684085.1_Indivirus_ILV1_Indivirus_1_genomic_sequence	16	KY110734.1_Saudi_moumouvirus,_partial_genome	1	DQ491001.1_Paramecium_bursaria_chlorella_virus_MT325_genomic_sequence	177	KY249681.1_Human_respiratory_syncytial_virus_B_isolate_RSVB/England138/2016,cg	109	JX997165.1_Paramecium_bursaria_Chlorella_virus_CvsA1,_partial_genome	7	NW_007587064.1_Cynoglossus_semilaevis_isolate_Cse_v1.0_unplaced_genomic_scaffold,_Cse_v1.0_scaffold5878,wgss	601	NC_024310.1_Cynoglossus_semilaevis_isolate_Cse_v1.0_chromosome_4,_Cse_v1.0,wgss	13	NW_007587064.1_Cynoglossus_semilaevis_isolate_Cse_v1.0_unplaced_genomic_scaffold,_Cse_v1.0_scaffold5878,wgss	824	NW_007592389.1_Cynoglossus_semilaevis_isolate_Cse_v1.0_unplaced_genomic_scaffold,_Cse_v1.0_scaffold6853,wgss	700	M81413.1_Pepper_mild_mottle_virus_strain_S_genomic_sequence	464	NW_007587064.1_Cynoglossus_semilaevis_isolate_Cse_v1.0_unplaced_genomic_scaffold,_Cse_v1.0_scaffold5878,wgss	46	U60315.1_Molluscum_contagiosum_virus_subtype_1,cg	285	NC_024310.1_Cynoglossus_semilaevis_isolate_Cse_v1.0_chromosome_4,_Cse_v1.0,wgss	31	KY684085.1_Indivirus_ILV1_Indivirus_1_genomic_sequence	225	NW_007592389.1_Cynoglossus_semilaevis_isolate_Cse_v1.0_unplaced_genomic_scaffold,_Cse_v1.0_scaffold6853,wgss	281	NW_007587064.1_Cynoglossus_semilaevis_isolate_Cse_v1.0_unplaced_genomic_scaffold,_Cse_v1.0_scaffold5878,wgss	631	NW_007587064.1_Cynoglossus_semilaevis_isolate_Cse_v1.0_unplaced_genomic_scaffold,_Cse_v1.0_scaffold5878,wgss	54	M81413.1_Pepper_mild_mottle_virus_strain_S_genomic_sequence	212	NW_007592389.1_Cynoglossus_semilaevis_isolate_Cse_v1.0_unplaced_genomic_scaffold,_Cse_v1.0_scaffold6853,wgss	25	NW_007591416.1_Cynoglossus_semilaevis_isolate_Cse_v1.0_unplaced_genomic_scaffold,_Cse_v1.0_scaffold6273,wgss	562	U60315.1_Molluscum_contagiosum_virus_subtype_1,cg	6
U60315.1_Molluscum_contagiosum_virus_subtype_1,cg	19	AF440570.1_Shrimp_white_spot_syndrome_virus,cg	20	NW_007591416.1_Cynoglossus_semilaevis_isolate_Cse_v1.0_unplaced_genomic_scaffold,_Cse_v1.0_scaffold6273,wgss	40	KP313240.1_Citrus_yellow_vein_clearing_virus_isolate_CQ,cg	45	NC_024307.1_Cynoglossus_semilaevis_isolate_Cse_v1.0_chromosome_1,_Cse_v1.0,wgss	2	JX997176.1_Paramecium_bursaria_Chlorella_virus_NE-JV-1,_partial_genome	1	NW_007592389.1_Cynoglossus_semilaevis_isolate_Cse_v1.0_unplaced_genomic_scaffold,_Cse_v1.0_scaffold6853,wgss	107	KY674984.1_Human_respiratory_syncytial_virus_B_strain_16B7,cg	108	KY684109.1_Klosneuvirus_KNV1_Klosneuvirus_2_genomic_sequence	4	NW_007591416.1_Cynoglossus_semilaevis_isolate_Cse_v1.0_unplaced_genomic_scaffold,_Cse_v1.0_scaffold6273,wgss	239	NC_024308.1_Cynoglossus_semilaevis_isolate_Cse_v1.0_chromosome_2,_Cse_v1.0,wgss	11	NC_045512.2_Wuhan_seafood_market_pneumonia_virus_isolate_Wuhan-Hu-1,cg	544	NW_007591416.1_Cynoglossus_semilaevis_isolate_Cse_v1.0_unplaced_genomic_scaffold,_Cse_v1.0_scaffold6273,wgss	221	NW_007587064.1_Cynoglossus_semilaevis_isolate_Cse_v1.0_unplaced_genomic_scaffold,_Cse_v1.0_scaffold5878,wgss	312	NW_007591416.1_Cynoglossus_semilaevis_isolate_Cse_v1.0_unplaced_genomic_scaffold,_Cse_v1.0_scaffold6273,wgss	45	NW_007592389.1_Cynoglossus_semilaevis_isolate_Cse_v1.0_unplaced_genomic_scaffold,_Cse_v1.0_scaffold6853,wgss	86	NW_007592389.1_Cynoglossus_semilaevis_isolate_Cse_v1.0_unplaced_genomic_scaffold,_Cse_v1.0_scaffold6853,wgss	24	NW_007592389.1_Cynoglossus_semilaevis_isolate_Cse_v1.0_unplaced_genomic_scaffold,_Cse_v1.0_scaffold6853,wgss	65	KY684085.1_Indivirus_ILV1_Indivirus_1_genomic_sequence	43	NC_045512.2_Wuhan_seafood_market_pneumonia_virus_isolate_Wuhan-Hu-1,cg	442	NW_007591416.1_Cynoglossus_semilaevis_isolate_Cse_v1.0_unplaced_genomic_scaffold,_Cse_v1.0_scaffold6273,wgss	24	NW_007592389.1_Cynoglossus_semilaevis_isolate_Cse_v1.0_unplaced_genomic_scaffold,_Cse_v1.0_scaffold6853,wgss	152	AY274119.3_Severe_acute_respiratory_syndrome-related_coronavirus_isolate_Tor2,cg	16	NW_007587064.1_Cynoglossus_semilaevis_isolate_Cse_v1.0_unplaced_genomic_scaffold,_Cse_v1.0_scaffold5878,wgss	446	J01917.1_Adenovirus_type_2,cg	4
NW_007591416.1_Cynoglossus_semilaevis_isolate_Cse_v1.0_unplaced_genomic_scaffold,_Cse_v1.0_scaffold6273,wgss	10	KY684105.1_Hokovirus_HKV1_Hokovirus_3_genomic_sequence	12	NW_007587064.1_Cynoglossus_semilaevis_isolate_Cse_v1.0_unplaced_genomic_scaffold,_Cse_v1.0_scaffold5878,wgss	30	NW_007592389.1_Cynoglossus_semilaevis_isolate_Cse_v1.0_unplaced_genomic_scaffold,_Cse_v1.0_scaffold6853,wgss	32	NW_007591416.1_Cynoglossus_semilaevis_isolate_Cse_v1.0_unplaced_genomic_scaffold,_Cse_v1.0_scaffold6273,wgss	2			NC_024310.1_Cynoglossus_semilaevis_isolate_Cse_v1.0_chromosome_4,_Cse_v1.0,wgss	23	KY249682.1_Human_respiratory_syncytial_virus_B_isolate_RSVB/England136/2016,cg	100	KY684085.1_Indivirus_ILV1_Indivirus_1_genomic_sequence	3	M81413.1_Pepper_mild_mottle_virus_strain_S_genomic_sequence	39	D12505.1_Cucumber_green_mottle_mosaic_virus_RNA,cg	3	NW_007591416.1_Cynoglossus_semilaevis_isolate_Cse_v1.0_unplaced_genomic_scaffold,_Cse_v1.0_scaffold6273,wgss	324	NC_045512.2_Wuhan_seafood_market_pneumonia_virus_isolate_Wuhan-Hu-1,cg	96	NW_007591416.1_Cynoglossus_semilaevis_isolate_Cse_v1.0_unplaced_genomic_scaffold,_Cse_v1.0_scaffold6273,wgss	97	NW_007611309.1_Cynoglossus_semilaevis_isolate_Cse_v1.0_unplaced_genomic_scaffold,_Cse_v1.0_C18262943,wgss	6	NW_007601119.1_Cynoglossus_semilaevis_isolate_Cse_v1.0_unplaced_genomic_scaffold,_Cse_v1.0_scaffold5982,wgss	42	AY274119.3_Severe_acute_respiratory_syndrome-related_coronavirus_isolate_Tor2,cg	8	U60315.1_Molluscum_contagiosum_virus_subtype_1,cg	23	D32136.1_Oryza_sativa_endornavirus_genomic_RNA,cg	41	NW_007591416.1_Cynoglossus_semilaevis_isolate_Cse_v1.0_unplaced_genomic_scaffold,_Cse_v1.0_scaffold6273,wgss	340	NC_024310.1_Cynoglossus_semilaevis_isolate_Cse_v1.0_chromosome_4,_Cse_v1.0,wgss	6	U60315.1_Molluscum_contagiosum_virus_subtype_1,cg	59	KY684085.1_Indivirus_ILV1_Indivirus_1_genomic_sequence	16	NW_007611309.1_Cynoglossus_semilaevis_isolate_Cse_v1.0_unplaced_genomic_scaffold,_Cse_v1.0_C18262943,wgss	306	BK000407.1_TPA:_Human_adenovirus_type_2,cg	4
AY274119.3_Severe_acute_respiratory_syndrome-related_coronavirus_isolate_Tor2,cg	6	AY274119.3_Severe_acute_respiratory_syndrome-related_coronavirus_isolate_Tor2,cg	6	AF440570.1_Shrimp_white_spot_syndrome_virus,cg	30	NC_024319.1_Cynoglossus_semilaevis_isolate_Cse_v1.0_chromosome_13,_Cse_v1.0,wgss	14	JX997154.1_Paramecium_bursaria_Chlorella_virus_AP110A,_partial_genome	1			NW_007587064.1_Cynoglossus_semilaevis_isolate_Cse_v1.0_unplaced_genomic_scaffold,_Cse_v1.0_scaffold5878,wgss	11	KY249683.1_Human_respiratory_syncytial_virus_B_isolate_RSVB/England133/2016,cg	94	AF440570.1_Shrimp_white_spot_syndrome_virus,cg	2	D00530.1_Potato_leafroll_virus_genes_for_28K,_70K,_17K_and_53K_proteins,_RNA-dependent_RNA_polymerase_and_coat_protein,_complete_and_partial_cds	18	KY110734.1_Saudi_moumouvirus,_partial_genome	2	AF332868.1_Tomato_mosaic_virus_isolate_Queensland,cg	133	NW_007611309.1_Cynoglossus_semilaevis_isolate_Cse_v1.0_unplaced_genomic_scaffold,_Cse_v1.0_C18262943,wgss	3	M34077.1_Tobacco_mild_green_mosaic_virus,cg	33	NC_045512.2_Wuhan_seafood_market_pneumonia_virus_isolate_Wuhan-Hu-1,cg	6	X70827.1_Human_papillomavirus_type_4_complete_genome	34	NW_007611309.1_Cynoglossus_semilaevis_isolate_Cse_v1.0_unplaced_genomic_scaffold,_Cse_v1.0_C18262943,wgss	3	J01917.1_Adenovirus_type_2,cg	20	KY684105.1_Hokovirus_HKV1_Hokovirus_3_genomic_sequence	35	V01408.1_Tobacco_mosaic_virus_genome_(variant_1)	17	BK000407.1_TPA:_Human_adenovirus_type_2,cg	4	NW_007613073.1_Cynoglossus_semilaevis_isolate_Cse_v1.0_unplaced_genomic_scaffold,_Cse_v1.0_scaffold4369,wgss	41	NC_024328.1_Cynoglossus_semilaevis_isolate_Cse_v1.0_chromosome_Z,_Cse_v1.0,wgss	8	HQ283392.1_Cucumber_mosaic_virus_isolate_SFQT1-2_segment_RNA1,cs	248	NW_007591416.1_Cynoglossus_semilaevis_isolate_Cse_v1.0_unplaced_genomic_scaffold,_Cse_v1.0_scaffold6273,wgss	4
NW_007587064.1_Cynoglossus_semilaevis_isolate_Cse_v1.0_unplaced_genomic_scaffold,_Cse_v1.0_scaffold5878,wgss	6	NW_007587064.1_Cynoglossus_semilaevis_isolate_Cse_v1.0_unplaced_genomic_scaffold,_Cse_v1.0_scaffold5878,wgss	5	NW_007611309.1_Cynoglossus_semilaevis_isolate_Cse_v1.0_unplaced_genomic_scaffold,_Cse_v1.0_C18262943,wgss	9	NW_007591416.1_Cynoglossus_semilaevis_isolate_Cse_v1.0_unplaced_genomic_scaffold,_Cse_v1.0_scaffold6273,wgss	11	KM982402.1_UNVERIFIED:_Acanthamoeba_polyphaga_mimivirus_strain_Kroon,cg	1			NW_007591416.1_Cynoglossus_semilaevis_isolate_Cse_v1.0_unplaced_genomic_scaffold,_Cse_v1.0_scaffold6273,wgss	10	KY684758.1_Human_respiratory_syncytial_virus_B_strain_SC2225,cg	81	AF033811.1_Moloney_murine_leukemia_virus,cg	1	M34077.1_Tobacco_mild_green_mosaic_virus,cg	14	NW_007611309.1_Cynoglossus_semilaevis_isolate_Cse_v1.0_unplaced_genomic_scaffold,_Cse_v1.0_C18262943,wgss	1	D00530.1_Potato_leafroll_virus_genes_for_28K,_70K,_17K_and_53K_proteins,_RNA-dependent_RNA_polymerase_and_coat_protein,_complete_and_partial_cds	51	KY399057.1_Picobirnavirus_dog/KNA/2015_strain_PBV/Dog/KNA/RVC7/2015_RNA-dependent_RNA_polymerase_gene,_complete_cds	2	D00530.1_Potato_leafroll_virus_genes_for_28K,_70K,_17K_and_53K_proteins,_RNA-dependent_RNA_polymerase_and_coat_protein,_complete_and_partial_cds	6	NC_024327.1_Cynoglossus_semilaevis_isolate_Cse_v1.0_chromosome_W,_Cse_v1.0,wgss	2	AY274119.3_Severe_acute_respiratory_syndrome-related_coronavirus_isolate_Tor2,cg	25	U60315.1_Molluscum_contagiosum_virus_subtype_1,cg	3	BK000407.1_TPA:_Human_adenovirus_type_2,cg	18	NW_007587064.1_Cynoglossus_semilaevis_isolate_Cse_v1.0_unplaced_genomic_scaffold,_Cse_v1.0_scaffold5878,wgss	28	NW_007611309.1_Cynoglossus_semilaevis_isolate_Cse_v1.0_unplaced_genomic_scaffold,_Cse_v1.0_C18262943,wgss	12	AF440570.1_Shrimp_white_spot_syndrome_virus,cg	3	NW_007591416.1_Cynoglossus_semilaevis_isolate_Cse_v1.0_unplaced_genomic_scaffold,_Cse_v1.0_scaffold6273,wgss	32	NW_007611309.1_Cynoglossus_semilaevis_isolate_Cse_v1.0_unplaced_genomic_scaffold,_Cse_v1.0_C18262943,wgss	7	KY794710.1_Cucumber_mosaic_virus_isolate_Met_segment_RNA3,cs	187	BK005234.1_TPA:_Human_adenovirus_type_1,cg	2
NW_007611309.1_Cynoglossus_semilaevis_isolate_Cse_v1.0_unplaced_genomic_scaffold,_Cse_v1.0_C18262943,wgss	6	KY684110.1_Klosneuvirus_KNV1_Klosneuvirus_3_genomic_sequence	3	AY274119.3_Severe_acute_respiratory_syndrome-related_coronavirus_isolate_Tor2,cg	9	NW_007587064.1_Cynoglossus_semilaevis_isolate_Cse_v1.0_unplaced_genomic_scaffold,_Cse_v1.0_scaffold5878,wgss	10	NC_024316.1_Cynoglossus_semilaevis_isolate_Cse_v1.0_chromosome_10,_Cse_v1.0,wgss	1			NW_007611309.1_Cynoglossus_semilaevis_isolate_Cse_v1.0_unplaced_genomic_scaffold,_Cse_v1.0_C18262943,wgss	2	KY249667.1_Human_respiratory_syncytial_virus_B_isolate_RSVB/England313/2012,cg	71	NW_007592389.1_Cynoglossus_semilaevis_isolate_Cse_v1.0_unplaced_genomic_scaffold,_Cse_v1.0_scaffold6853,wgss	1	KC008572.1_UNVERIFIED:_Moumouvirus_goulette,cg	8	AY274119.3_Severe_acute_respiratory_syndrome-related_coronavirus_isolate_Tor2,cg	1	KF477193.1_Tomato_mottle_mosaic_virus_isolate_MX5,cg	33	M81413.1_Pepper_mild_mottle_virus_strain_S_genomic_sequence	2	NW_007611309.1_Cynoglossus_semilaevis_isolate_Cse_v1.0_unplaced_genomic_scaffold,_Cse_v1.0_C18262943,wgss	5	BK000407.1_TPA:_Human_adenovirus_type_2,cg	2	J01917.1_Adenovirus_type_2,cg	19	BK000407.1_TPA:_Human_adenovirus_type_2,cg	3	NW_007587064.1_Cynoglossus_semilaevis_isolate_Cse_v1.0_unplaced_genomic_scaffold,_Cse_v1.0_scaffold5878,wgss	16	NW_007591416.1_Cynoglossus_semilaevis_isolate_Cse_v1.0_unplaced_genomic_scaffold,_Cse_v1.0_scaffold6273,wgss	26	AJ307057.1_Leek_yellow_stripe_potyvirus_genomic_RNA_for_viral_polyprotein,_isolate_Yuhang_GYH	11	AJ507799.2_Human_herpesvirus_4_complete_wild_type_genome	2	NW_007611309.1_Cynoglossus_semilaevis_isolate_Cse_v1.0_unplaced_genomic_scaffold,_Cse_v1.0_C18262943,wgss	27	NW_007591416.1_Cynoglossus_semilaevis_isolate_Cse_v1.0_unplaced_genomic_scaffold,_Cse_v1.0_scaffold6273,wgss	6	LC339509.1_Cucumber_mosaic_virus_Ma-1_genomic_RNA,_segment:_RNA1,cs	175	NW_007587064.1_Cynoglossus_semilaevis_isolate_Cse_v1.0_unplaced_genomic_scaffold,_Cse_v1.0_scaffold5878,wgss	2
U31787.1_Human_papillomavirus_type_38,cg	4	BK000407.1_TPA:_Human_adenovirus_type_2,cg	2	KY684085.1_Indivirus_ILV1_Indivirus_1_genomic_sequence	6	NC_045512.2_Wuhan_seafood_market_pneumonia_virus_isolate_Wuhan-Hu-1,cg	8	JX997160.1_Paramecium_bursaria_Chlorella_virus_CVB-1,_partial_genome	1			U60315.1_Molluscum_contagiosum_virus_subtype_1,cg	1	KY249673.1_Human_respiratory_syncytial_virus_B_isolate_RSVB/England537/2012,cg	71			D21829.2_Apple_stem_pitting_virus_genes_for_RNA-dependent_RNA_polymerase,_triple_gene_block_ORFs_and_coat_protein,_complete_cds	6	NW_007592389.1_Cynoglossus_semilaevis_isolate_Cse_v1.0_unplaced_genomic_scaffold,_Cse_v1.0_scaffold6853,wgss	1	U16304.1_Citrus_tristeza_virus_complete_genome	24	NC_024316.1_Cynoglossus_semilaevis_isolate_Cse_v1.0_chromosome_10,_Cse_v1.0,wgss	1	NC_045512.2_Wuhan_seafood_market_pneumonia_virus_isolate_Wuhan-Hu-1,cg	2	J01917.1_Adenovirus_type_2,cg	2	BK000407.1_TPA:_Human_adenovirus_type_2,cg	19	NW_007591416.1_Cynoglossus_semilaevis_isolate_Cse_v1.0_unplaced_genomic_scaffold,_Cse_v1.0_scaffold6273,wgss	3	NW_007611309.1_Cynoglossus_semilaevis_isolate_Cse_v1.0_unplaced_genomic_scaffold,_Cse_v1.0_C18262943,wgss	14	NC_024328.1_Cynoglossus_semilaevis_isolate_Cse_v1.0_chromosome_Z,_Cse_v1.0,wgss	8	NW_007585112.1_Cynoglossus_semilaevis_isolate_Cse_v1.0_unplaced_genomic_scaffold,_Cse_v1.0_scaffold1699,wgss	6	KY684109.1_Klosneuvirus_KNV1_Klosneuvirus_2_genomic_sequence	2	J01917.1_Adenovirus_type_2,cg	18	NW_007587064.1_Cynoglossus_semilaevis_isolate_Cse_v1.0_unplaced_genomic_scaffold,_Cse_v1.0_scaffold5878,wgss	4	KX660758.1_Cucumber_mosaic_virus_isolate_Anhui_segment_RNA3,cs	143	X70827.1_Human_papillomavirus_type_4_complete_genome	2
BK000407.1_TPA:_Human_adenovirus_type_2,cg	4	J01917.1_Adenovirus_type_2,cg	2	AB331651.1_Bovine_papillomavirus-10_DNA,cg	3	U60315.1_Molluscum_contagiosum_virus_subtype_1,cg	2	NC_045512.2_Wuhan_seafood_market_pneumonia_virus_isolate_Wuhan-Hu-1,cg	1			JX997154.1_Paramecium_bursaria_Chlorella_virus_AP110A,_partial_genome	1	MF001058.1_Human_respiratory_syncytial_virus_B_strain_SC2935,cg	71			NW_007611309.1_Cynoglossus_semilaevis_isolate_Cse_v1.0_unplaced_genomic_scaffold,_Cse_v1.0_C18262943,wgss	5	MG602507.1_UNVERIFIED:_Acanthamoeba_polyphaga_mimivirus,_partial_genome	1	KY038943.1_Tobacco_virus_2,cg	12	KX396056.1_Primate_norovirus_strain_SimianNoV-nj,cg	1	NC_024328.1_Cynoglossus_semilaevis_isolate_Cse_v1.0_chromosome_Z,_Cse_v1.0,wgss	1	LT608134.1_Herpes_simplex_virus_(type_1_/_strain_17)_genome_assembly,_chromosome:_I	1	NW_007591416.1_Cynoglossus_semilaevis_isolate_Cse_v1.0_unplaced_genomic_scaffold,_Cse_v1.0_scaffold6273,wgss	19	EU410304.1_Vaccinia_virus_GLV-1h68,cg	3	NW_007591416.1_Cynoglossus_semilaevis_isolate_Cse_v1.0_unplaced_genomic_scaffold,_Cse_v1.0_scaffold6273,wgss	14	NW_007611309.1_Cynoglossus_semilaevis_isolate_Cse_v1.0_unplaced_genomic_scaffold,_Cse_v1.0_C18262943,wgss	6	U60315.1_Molluscum_contagiosum_virus_subtype_1,cg	4	U60315.1_Molluscum_contagiosum_virus_subtype_1,cg	1	BK000407.1_TPA:_Human_adenovirus_type_2,cg	16	AF190123.1_Tobacco_vein-clearing_virus,cg	2	DQ402477.1_Cucumber_mosaic_virus_isolate_Phy_from_China_segment_RNA1,cs	137	X74465.1_Human_papillomavirus_type_10_genomic_DNA	2
J01917.1_Adenovirus_type_2,cg	4	NW_007591416.1_Cynoglossus_semilaevis_isolate_Cse_v1.0_unplaced_genomic_scaffold,_Cse_v1.0_scaffold6273,wgss	1	NC_024310.1_Cynoglossus_semilaevis_isolate_Cse_v1.0_chromosome_4,_Cse_v1.0,wgss	3	NW_007601119.1_Cynoglossus_semilaevis_isolate_Cse_v1.0_unplaced_genomic_scaffold,_Cse_v1.0_scaffold5982,wgss	1	AF440570.1_Shrimp_white_spot_syndrome_virus,cg	1			NW_007585112.1_Cynoglossus_semilaevis_isolate_Cse_v1.0_unplaced_genomic_scaffold,_Cse_v1.0_scaffold1699,wgss	1	KY924878.1_Human_respiratory_syncytial_virus_B_strain_RSVB/BCH-Y/2016,cg	66			NC_045512.2_Wuhan_seafood_market_pneumonia_virus_isolate_Wuhan-Hu-1,cg	3			M81413.1_Pepper_mild_mottle_virus_strain_S_genomic_sequence	11	D10930.1_Pea_seed-borne_mosaic_virus_gene_for_polyprotein,_complete_cds	1	BK000407.1_TPA:_Human_adenovirus_type_2,cg	1	LT594457.1_Human_herpesvirus_1_isolate_132_1998_genome_assembly,cg:_monopartite	1	NW_007611309.1_Cynoglossus_semilaevis_isolate_Cse_v1.0_unplaced_genomic_scaffold,_Cse_v1.0_C18262943,wgss	18	NW_007587064.1_Cynoglossus_semilaevis_isolate_Cse_v1.0_unplaced_genomic_scaffold,_Cse_v1.0_scaffold5878,wgss	2	AY274119.3_Severe_acute_respiratory_syndrome-related_coronavirus_isolate_Tor2,cg	12	NC_024308.1_Cynoglossus_semilaevis_isolate_Cse_v1.0_chromosome_2,_Cse_v1.0,wgss	3	X70827.1_Human_papillomavirus_type_4_complete_genome	4	X70827.1_Human_papillomavirus_type_4_complete_genome	1	M34077.1_Tobacco_mild_green_mosaic_virus,cg	13	U60315.1_Molluscum_contagiosum_virus_subtype_1,cg	2	KU255791.1_Cucumber_mosaic_virus_strain_DA_segment_RNA2,cs	135	LT594106.1_Human_herpesvirus_1_isolate_2158_2007_genome_assembly,cg:_monopartite	1
NW_007585112.1_Cynoglossus_semilaevis_isolate_Cse_v1.0_unplaced_genomic_scaffold,_Cse_v1.0_scaffold1699,wgss	4	NC_024311.1_Cynoglossus_semilaevis_isolate_Cse_v1.0_chromosome_5,_Cse_v1.0,wgss	1	NW_007613073.1_Cynoglossus_semilaevis_isolate_Cse_v1.0_unplaced_genomic_scaffold,_Cse_v1.0_scaffold4369,wgss	2	KY040274.1_Molluscum_contagiosum_virus_subtype_2_isolate_Madrid_2016_1,cg	1					NC_024321.1_Cynoglossus_semilaevis_isolate_Cse_v1.0_chromosome_15,_Cse_v1.0,wgss	1	MF001048.1_Human_respiratory_syncytial_virus_B_strain_8B3,cg	61			HQ339956.1_Apricot_latent_virus_isolate_A18,cg	3			D32136.1_Oryza_sativa_endornavirus_genomic_RNA,cg	5	AF440570.1_Shrimp_white_spot_syndrome_virus,cg	1	V01408.1_Tobacco_mosaic_virus_genome_(variant_1)	1	M81413.1_Pepper_mild_mottle_virus_strain_S_genomic_sequence	1	NC_024322.1_Cynoglossus_semilaevis_isolate_Cse_v1.0_chromosome_16,_Cse_v1.0,wgss	17	J01917.1_Adenovirus_type_2,cg	2	JX463183.1_STL_polyomavirus_strain_MA138,cg	11	NC_024310.1_Cynoglossus_semilaevis_isolate_Cse_v1.0_chromosome_4,_Cse_v1.0,wgss	3	AJ510223.1_Onion_yellow_dwarf_virus_gene_for_polyprotein,_genomic_RNA,_isolate_Yuhang	4	FJ947080.1_Human_papillomavirus_type_115_isolate_GC02,cg	1	NW_007587064.1_Cynoglossus_semilaevis_isolate_Cse_v1.0_unplaced_genomic_scaffold,_Cse_v1.0_scaffold5878,wgss	10	NW_007585112.1_Cynoglossus_semilaevis_isolate_Cse_v1.0_unplaced_genomic_scaffold,_Cse_v1.0_scaffold1699,wgss	2	KM272275.1_Cucumber_mosaic_virus_strain_KO_segment_RNA3,cs	134	LT594109.1_Human_herpesvirus_1_isolate_270_2007_genome_assembly,cg:_monopartite	1
NW_007607112.1_Cynoglossus_semilaevis_isolate_Cse_v1.0_unplaced_genomic_scaffold,_Cse_v1.0_C18367692,wgss	3	U60315.1_Molluscum_contagiosum_virus_subtype_1,cg	1	KY684109.1_Klosneuvirus_KNV1_Klosneuvirus_2_genomic_sequence	2	AB331651.1_Bovine_papillomavirus-10_DNA,cg	1							KY249657.1_Human_respiratory_syncytial_virus_B_isolate_RSVB/England263/2014,cg	59			KY038943.1_Tobacco_virus_2,cg	3			NW_007611309.1_Cynoglossus_semilaevis_isolate_Cse_v1.0_unplaced_genomic_scaffold,_Cse_v1.0_C18262943,wgss	2			J01917.1_Adenovirus_type_2,cg	1	JX997170.1_Paramecium_bursaria_Chlorella_virus_IL-5-2s1,_partial_genome	1	M81413.1_Pepper_mild_mottle_virus_strain_S_genomic_sequence	14	NC_024321.1_Cynoglossus_semilaevis_isolate_Cse_v1.0_chromosome_15,_Cse_v1.0,wgss	1	M37980.1_Avian_leukosis_virus_-_RSA,cg	7	AY274119.3_Severe_acute_respiratory_syndrome-related_coronavirus_isolate_Tor2,cg	2	NC_024320.1_Cynoglossus_semilaevis_isolate_Cse_v1.0_chromosome_14,_Cse_v1.0,wgss	3	NC_024323.1_Cynoglossus_semilaevis_isolate_Cse_v1.0_chromosome_17,_Cse_v1.0,wgss	1	Y15173.1_Human_papillomavirus_type_75_E6,_E7,_E1,_E2,_E4,_L2,_and_L1_genes	10	NC_024308.1_Cynoglossus_semilaevis_isolate_Cse_v1.0_chromosome_2,_Cse_v1.0,wgss	1	KT350980.1_Cucumber_mosaic_virus_isolate_ZMBJ_segment_RNA1,cs	122	AY382779.2_Human_papillomavirus_type_96,cg	1
NC_024310.1_Cynoglossus_semilaevis_isolate_Cse_v1.0_chromosome_4,_Cse_v1.0,wgss	3	JF906559.1_Human_papillomavirus_155_isolate_SE42,cg	1	U60315.1_Molluscum_contagiosum_virus_subtype_1,cg	2	KY684110.1_Klosneuvirus_KNV1_Klosneuvirus_3_genomic_sequence	1							KY249656.1_Human_respiratory_syncytial_virus_B_isolate_RSVB/England136/2014,cg	55			AB523788.1_Cucurbit_chlorotic_yellows_virus_RNA_1_segment,cs	1			M34077.1_Tobacco_mild_green_mosaic_virus,cg	2							NC_024318.1_Cynoglossus_semilaevis_isolate_Cse_v1.0_chromosome_12,_Cse_v1.0,wgss	14	MG602507.1_UNVERIFIED:_Acanthamoeba_polyphaga_mimivirus,_partial_genome	1	NW_007601119.1_Cynoglossus_semilaevis_isolate_Cse_v1.0_unplaced_genomic_scaffold,_Cse_v1.0_scaffold5982,wgss	6	FJ947080.1_Human_papillomavirus_type_115_isolate_GC02,cg	2	X56147.1_Human_papillomavirus_type_41	3	J01917.1_Adenovirus_type_2,cg	1	BK005234.1_TPA:_Human_adenovirus_type_1,cg	7	KT995472.1_White_spot_syndrome_virus_strain_CN01,cg	1	NW_007585112.1_Cynoglossus_semilaevis_isolate_Cse_v1.0_unplaced_genomic_scaffold,_Cse_v1.0_scaffold1699,wgss	109	LT576870.1_Herpes_simplex_virus_(type_1_/_strain_17)_genome_assembly,_chromosome:_I	1
V01408.1_Tobacco_mosaic_virus_genome_(variant_1)	3	EU410304.1_Vaccinia_virus_GLV-1h68,cg	1	JX997155.1_Acanthocystis_turfacea_Chlorella_virus_Br0604L,_partial_genome	2	J01917.1_Adenovirus_type_2,cg	1							MF973154.1_Human_respiratory_syncytial_virus_B_strain_7I8,cg	48			M58152.1_Apple_chlorotic_leaf_spot_virus,cg	1			AJ292226.1_Garlic_latent_virus_complete_genomic_RNA,_isolate_YH1	2							KY040274.1_Molluscum_contagiosum_virus_subtype_2_isolate_Madrid_2016_1,cg	14	AF169561.2_Turnip_mosaic_virus_strain_UK1,cg	1	X56147.1_Human_papillomavirus_type_41	5	AF332868.1_Tomato_mosaic_virus_isolate_Queensland,cg	2	NW_007607112.1_Cynoglossus_semilaevis_isolate_Cse_v1.0_unplaced_genomic_scaffold,_Cse_v1.0_C18367692,wgss	3			NC_001354.1_Human_papillomavirus_type_41,cg	6	LT594106.1_Human_herpesvirus_1_isolate_2158_2007_genome_assembly,cg:_monopartite	1	U60315.1_Molluscum_contagiosum_virus_subtype_1,cg	107	NW_007601119.1_Cynoglossus_semilaevis_isolate_Cse_v1.0_unplaced_genomic_scaffold,_Cse_v1.0_scaffold5982,wgss	1
KY040274.1_Molluscum_contagiosum_virus_subtype_2_isolate_Madrid_2016_1,cg	2	LT576869.1_Herpes_simplex_virus_(type_1_/_strain_17)_genome_assembly,_chromosome:_I	1	NW_007585112.1_Cynoglossus_semilaevis_isolate_Cse_v1.0_unplaced_genomic_scaffold,_Cse_v1.0_scaffold1699,wgss	2	JN258408.1_Megavirus_chiliensis,cg	1							KY249664.1_Human_respiratory_syncytial_virus_B_isolate_RSVB/England135/2013,cg	42			HE963831.1_Apple_green_crinkle_associated_virus_complete_genome,_genomic_RNA,_isolate_Aurora-1	1			KC527772.1_Cucumber_mosaic_virus_isolate_RP48_segment_RNA3,cs	1							MF588710.1_Gammapapillomavirus_9_isolate_Gamma09_w11C39,cg	12	X56147.1_Human_papillomavirus_type_41	1	LT594108.1_Human_herpesvirus_1_isolate_1319_2005_genome_assembly,cg:_monopartite	4	NW_007601119.1_Cynoglossus_semilaevis_isolate_Cse_v1.0_unplaced_genomic_scaffold,_Cse_v1.0_scaffold5982,wgss	2	U89243.1_Garlic_virus_X,cg	2			NW_007585112.1_Cynoglossus_semilaevis_isolate_Cse_v1.0_unplaced_genomic_scaffold,_Cse_v1.0_scaffold1699,wgss	5	NW_007607112.1_Cynoglossus_semilaevis_isolate_Cse_v1.0_unplaced_genomic_scaffold,_Cse_v1.0_C18367692,wgss	1	EU414790.1_Cucumber_mosaic_virus_isolate_CMV-QZ_movement_protein_(mp)_gene,_complete_cds	102	BK000408.1_TPA:_Human_adenovirus_type_5,cg	1
HQ413315.1_Human_adenovirus_6_isolate_Tonsil_99,cg	2	KY684109.1_Klosneuvirus_KNV1_Klosneuvirus_2_genomic_sequence	1	NC_024327.1_Cynoglossus_semilaevis_isolate_Cse_v1.0_chromosome_W,_Cse_v1.0,wgss	1									KY249678.1_Human_respiratory_syncytial_virus_B_isolate_RSVB/England122/2011,cg	40			AY366207.2_Schlumbergera_virus_X_strain_K11,cg	1			KJ400002.1_Cucumber_mosaic_virus_isolate_209_segment_RNA1,cs	1							MF588678.1_Betapapillomavirus_1_isolate_Beta01_m292c10,cg	12	NW_007607112.1_Cynoglossus_semilaevis_isolate_Cse_v1.0_unplaced_genomic_scaffold,_Cse_v1.0_C18367692,wgss	1	AF033808.1_Rous_sarcoma_virus,cg	4	BK000407.1_TPA:_Human_adenovirus_type_2,cg	2	J01917.1_Adenovirus_type_2,cg	2			HQ413315.1_Human_adenovirus_6_isolate_Tonsil_99,cg	5	X14112.1_Human_herpesvirus_1_complete_genome	1	LC066503.1_Cucumber_mosaic_virus_genomic_RNA,_segment:_3,cs,_isolate:_TUR54	100	HM999989.1_Human_papillomavirus_type_137_isolate_NJ2801H,cg	1
X70827.1_Human_papillomavirus_type_4_complete_genome	2	LT594107.1_Human_herpesvirus_1_isolate_3083_2008_genome_assembly,cg:_monopartite	1	JX997183.1_Paramecium_bursaria_Chlorella_virus_NYs1,_partial_genome	1									MF001046.1_Human_respiratory_syncytial_virus_B_strain_6C5,cg	39			D14995.2_Apple_stem_grooving_virus_genome,cs	1			KP313240.1_Citrus_yellow_vein_clearing_virus_isolate_CQ,cg	1							KF800043.1_Citrus_endogenous_pararetrovirus_clone_CB16-3,cg	12	LT576870.1_Herpes_simplex_virus_(type_1_/_strain_17)_genome_assembly,_chromosome:_I	1	FM955839.1_Human_papillomavirus_type_100,cg	3	JN885991.1_Megavirus_courdo7_isolate_Mv13-c7,_partial_genome	2	BK000407.1_TPA:_Human_adenovirus_type_2,cg	2			NW_007607112.1_Cynoglossus_semilaevis_isolate_Cse_v1.0_unplaced_genomic_scaffold,_Cse_v1.0_C18367692,wgss	5	AF440570.1_Shrimp_white_spot_syndrome_virus,cg	1	KC019301.1_Cucumber_mosaic_virus_segment_RNA3,cs	97	Y15173.1_Human_papillomavirus_type_75_E6,_E7,_E1,_E2,_E4,_L2,_and_L1_genes	1
LT594110.1_Human_herpesvirus_1_isolate_66_2007_genome_assembly,cg:_monopartite	1			NC_024328.1_Cynoglossus_semilaevis_isolate_Cse_v1.0_chromosome_Z,_Cse_v1.0,wgss	1									KY249679.1_Human_respiratory_syncytial_virus_B_isolate_RSVB/England002/2011,cg	38			KC693009.1_Cucumber_mosaic_virus_isolate_ZMBJ_segment_RNA3,cs	1			KC527797.1_Cucumber_mosaic_virus_isolate_RP24_segment_RNA1,cs	1							NC_001354.1_Human_papillomavirus_type_41,cg	9	NC_001354.1_Human_papillomavirus_type_41,cg	1	FJ947080.1_Human_papillomavirus_type_115_isolate_GC02,cg	2	AB010300.1_Garlic_virus_A_genomic_RNA,cg	1	NC_024325.1_Cynoglossus_semilaevis_isolate_Cse_v1.0_chromosome_19,_Cse_v1.0,wgss	2			D12505.1_Cucumber_green_mottle_mosaic_virus_RNA,cg	4	J01917.1_Adenovirus_type_2,cg	1	D28778.1_Cucumber_mosaic_virus_gene_for_1a,_complete_cds,_segment_1	93	D21829.2_Apple_stem_pitting_virus_genes_for_RNA-dependent_RNA_polymerase,_triple_gene_block_ORFs_and_coat_protein,_complete_cds	1
NC_001354.1_Human_papillomavirus_type_41,cg	1			DQ491001.1_Paramecium_bursaria_chlorella_virus_MT325_genomic_sequence	1									KY249677.1_Human_respiratory_syncytial_virus_B_isolate_RSVB/England132/2012,cg	33			U60315.1_Molluscum_contagiosum_virus_subtype_1,cg	1			LC066512.1_Cucumber_mosaic_virus_genomic_RNA,_segment:_3,cs,_isolate:_TUR84	1							MF588749.1_Gammapapillomavirus_24_isolate_Gamma24_w07c74b,cg	8	LT594111.1_Human_herpesvirus_1_isolate_1394_2005_genome_assembly,cg:_monopartite	1	NC_001354.1_Human_papillomavirus_type_41,cg	2	HM011556.1_Merkel_cell_polyomavirus_isolate_R17b,cg	1	LC195294.1_Pepper_cryptic_virus_2_RdRp_gene_for_putative_RNA-dependent_RNA_polymerase,_complete_cds,_isolate:_YY	2			X56147.1_Human_papillomavirus_type_41	4	LT576867.1_Herpes_simplex_virus_(type_1_/_strain_17)_genome_assembly,_chromosome:_I	1	LC066420.1_Cucumber_mosaic_virus_genomic_RNA,_segment:_1,cs,_isolate:_MS655J	91	JX463183.1_STL_polyomavirus_strain_MA138,cg	1
NC_024327.1_Cynoglossus_semilaevis_isolate_Cse_v1.0_chromosome_W,_Cse_v1.0,wgss	1			MG602508.1_UNVERIFIED:_Acanthamoeba_polyphaga_mimivirus,_partial_genome	1									KY249670.1_Human_respiratory_syncytial_virus_B_isolate_RSVB/England783/2012,cg	33			LC195294.1_Pepper_cryptic_virus_2_RdRp_gene_for_putative_RNA-dependent_RNA_polymerase,_complete_cds,_isolate:_YY	1											NW_007587064.1_Cynoglossus_semilaevis_isolate_Cse_v1.0_unplaced_genomic_scaffold,_Cse_v1.0_scaffold5878,wgss	8	X70827.1_Human_papillomavirus_type_4_complete_genome	1	HQ413315.1_Human_adenovirus_6_isolate_Tonsil_99,cg	2	J01917.1_Adenovirus_type_2,cg	1	KC527762.1_Cucumber_mosaic_virus_isolate_RP35_segment_RNA3,cs	2			EU410304.1_Vaccinia_virus_GLV-1h68,cg	4	LT576868.1_Herpes_simplex_virus_(type_1_/_strain_17)_genome_assembly,_chromosome:_I	1	KC527696.1_Cucumber_mosaic_virus_isolate_RP12_segment_RNA2,cs	85	HQ413315.1_Human_adenovirus_6_isolate_Tonsil_99,cg	1
D12505.1_Cucumber_green_mottle_mosaic_virus_RNA,cg	1			AJ507799.2_Human_herpesvirus_4_complete_wild_type_genome	1									KY249665.1_Human_respiratory_syncytial_virus_B_isolate_RSVB/England617/2013,cg	33			LC066401.1_Cucumber_mosaic_virus_genomic_RNA,_segment:_3,cs,_isolate:_AKD822J	1											EF422221.1_Human_papillomavirus_type_107,cg	7	HQ413315.1_Human_adenovirus_6_isolate_Tonsil_99,cg	1	LT576871.1_Herpes_simplex_virus_(type_1_/_strain_17)_isolate_5B_genome_assembly,_chromosome:_I	2	KF477193.1_Tomato_mottle_mosaic_virus_isolate_MX5,cg	1	KM379144.1_Garlic_virus_B_isolate_Mesi_13,cg	2			LT576870.1_Herpes_simplex_virus_(type_1_/_strain_17)_genome_assembly,_chromosome:_I	3	MG602508.1_UNVERIFIED:_Acanthamoeba_polyphaga_mimivirus,_partial_genome	1	DQ412732.1_Cucumber_mosaic_virus_isolate_Phy_segment_RNA3,cs	84	MF588711.1_Gammapapillomavirus_9_isolate_Gamma09_w23c101c,cg	1
M81413.1_Pepper_mild_mottle_virus_strain_S_genomic_sequence	1			EU410304.1_Vaccinia_virus_GLV-1h68,cg	1									KY249668.1_Human_respiratory_syncytial_virus_B_isolate_RSVB/England453/2012,cg	27			MG554632.1_Botrytis_cinerea_hypovirus_1,cg	1											BK005234.1_TPA:_Human_adenovirus_type_1,cg	6	LT576868.1_Herpes_simplex_virus_(type_1_/_strain_17)_genome_assembly,_chromosome:_I	1	LT594110.1_Human_herpesvirus_1_isolate_66_2007_genome_assembly,cg:_monopartite	2	JX463183.1_STL_polyomavirus_strain_MA138,cg	1	KC527752.1_Cucumber_mosaic_virus_isolate_RP24_segment_RNA3,cs	2			U31787.1_Human_papillomavirus_type_38,cg	3	NC_030848.1_Haloarcula_californiae_icosahedral_virus_1,cg	1	EU414800.1_Cucumber_mosaic_virus_isolate_CMV-QZ_segment_RNA2_2a_protein_(2a)_and_2b_protein_(2b)_genes,_complete_cds	84	LT594110.1_Human_herpesvirus_1_isolate_66_2007_genome_assembly,cg:_monopartite	1
LT594105.1_Human_herpesvirus_1_isolate_172_2010_genome_assembly,cg:_monopartite	1													KY249680.1_Human_respiratory_syncytial_virus_B_isolate_RSVB/England447/2011,cg	25			AB523789.1_Cucurbit_chlorotic_yellows_virus_RNA_2_segment,cs	1											EU541441.1_Human_papillomavirus_type_109,cg	6	LT594110.1_Human_herpesvirus_1_isolate_66_2007_genome_assembly,cg:_monopartite	1	BK005234.1_TPA:_Human_adenovirus_type_1,cg	1	NW_007585112.1_Cynoglossus_semilaevis_isolate_Cse_v1.0_unplaced_genomic_scaffold,_Cse_v1.0_scaffold1699,wgss	1	KC527732.1_Cucumber_mosaic_virus_isolate_RP3_segment_RNA3,cs	1			BK000408.1_TPA:_Human_adenovirus_type_5,cg	3	X74465.1_Human_papillomavirus_type_10_genomic_DNA	1	U20219.1_Cucumber_mosaic_virus_3a_protein_and_capsid_protein_genes,_complete_cds	79
BK005234.1_TPA:_Human_adenovirus_type_1,cg	1													MF973155.1_Human_respiratory_syncytial_virus_B_strain_5T9,cg	24															X56147.1_Human_papillomavirus_type_41	5			LT594457.1_Human_herpesvirus_1_isolate_132_1998_genome_assembly,cg:_monopartite	1	MG602508.1_UNVERIFIED:_Acanthamoeba_polyphaga_mimivirus,_partial_genome	1	KC527774.1_Cucumber_mosaic_virus_isolate_RP50_segment_RNA3,cs	1			AJ507799.2_Human_herpesvirus_4_complete_wild_type_genome	3	KM982402.1_UNVERIFIED:_Acanthamoeba_polyphaga_mimivirus_strain_Kroon,cg	1	KC019300.1_Cucumber_mosaic_virus_segment_RNA2,cs	79
LT608134.1_Herpes_simplex_virus_(type_1_/_strain_17)_genome_assembly,_chromosome:_I	1													MF001042.1_Human_respiratory_syncytial_virus_B_strain_6A6,cg	24															AF190123.1_Tobacco_vein-clearing_virus,cg	5			LT576870.1_Herpes_simplex_virus_(type_1_/_strain_17)_genome_assembly,_chromosome:_I	1	AJ292226.1_Garlic_latent_virus_complete_genomic_RNA,_isolate_YH1	1	NC_001354.1_Human_papillomavirus_type_41,cg	1			LT576869.1_Herpes_simplex_virus_(type_1_/_strain_17)_genome_assembly,_chromosome:_I	2	LT594110.1_Human_herpesvirus_1_isolate_66_2007_genome_assembly,cg:_monopartite	1	HE971670.1_Cucumber_mosaic_virus_partial_CP_gene_for_coat_protein,_segment_RNA3,_genomic_RNA,_isolate_DHH1.1/09	78
														MF001055.1_Human_respiratory_syncytial_virus_B_strain_8Q6,cg	24															AF440570.1_Shrimp_white_spot_syndrome_virus,cg	4			KY684110.1_Klosneuvirus_KNV1_Klosneuvirus_3_genomic_sequence	1			MG602508.1_UNVERIFIED:_Acanthamoeba_polyphaga_mimivirus,_partial_genome	1			LT594107.1_Human_herpesvirus_1_isolate_3083_2008_genome_assembly,cg:_monopartite	2			HQ283391.1_Cucumber_mosaic_virus_isolate_SFQT1-2_segment_RNA2,cs	78
														MF001044.1_Human_respiratory_syncytial_virus_B_strain_6A8,cg	23															HQ413315.1_Human_adenovirus_6_isolate_Tonsil_99,cg	3			JX997176.1_Paramecium_bursaria_Chlorella_virus_NE-JV-1,_partial_genome	1			LT576871.1_Herpes_simplex_virus_(type_1_/_strain_17)_isolate_5B_genome_assembly,_chromosome:_I	1			LT594111.1_Human_herpesvirus_1_isolate_1394_2005_genome_assembly,cg:_monopartite	2			AM183114.1_Cucumber_mosaic_virus_(strain_Pl-1)_genomic_RNA_segment_RNA1,_strain_Pl-1,cs	77
														KY249663.1_Human_respiratory_syncytial_virus_B_isolate_RSVB/England005/2013,cg	23															AB010300.1_Garlic_virus_A_genomic_RNA,cg	3			LT594111.1_Human_herpesvirus_1_isolate_1394_2005_genome_assembly,cg:_monopartite	1			M12737.1_Human_papillomavirus_type_8,cg	1			LT576871.1_Herpes_simplex_virus_(type_1_/_strain_17)_isolate_5B_genome_assembly,_chromosome:_I	2			KC527755.1_Cucumber_mosaic_virus_isolate_RP27_segment_RNA3,cs	72
														MF001040.1_Human_respiratory_syncytial_virus_B_strain_6A10,cg	22															NW_007607112.1_Cynoglossus_semilaevis_isolate_Cse_v1.0_unplaced_genomic_scaffold,_Cse_v1.0_C18367692,wgss	3			LT594112.1_Human_herpesvirus_1_isolate_369_2007_genome_assembly,cg:_monopartite	1			AJ292226.1_Garlic_latent_virus_complete_genomic_RNA,_isolate_YH1	1			KY684105.1_Hokovirus_HKV1_Hokovirus_3_genomic_sequence	2			DQ412731.1_Cucumber_mosaic_virus_isolate_Phy_segment_RNA2,cs	71
														KY249669.1_Human_respiratory_syncytial_virus_B_isolate_RSVB/England787/2012,cg	22															HE601899.1_Squirrel_poxvirus_strain_Red_squirrel_UK_complete_genome	3			LT594109.1_Human_herpesvirus_1_isolate_270_2007_genome_assembly,cg:_monopartite	1			AP017398.1_Tokyovirus_A1_DNA,_nearly_complete_genome	1			LT594110.1_Human_herpesvirus_1_isolate_66_2007_genome_assembly,cg:_monopartite	2			MG182149.1_Cucumber_mosaic_virus_strain_K_2016_segment_RNA2,cs	63
														KY249658.1_Human_respiratory_syncytial_virus_B_isolate_RSVB/England167/2014,cg	21															AJ507799.2_Human_herpesvirus_4_complete_wild_type_genome	3			NW_007607112.1_Cynoglossus_semilaevis_isolate_Cse_v1.0_unplaced_genomic_scaffold,_Cse_v1.0_C18367692,wgss	1			MG470800.1_Cucumber_mosaic_virus_isolate_R1_segment_RNA3_3a_protein_gene,_partial_cds;_and_coat_protein_gene,_complete_cds	1			LT594112.1_Human_herpesvirus_1_isolate_369_2007_genome_assembly,cg:_monopartite	2			EU723568.1_Cucumber_mosaic_virus_strain_PHz_segment_RNA1,cs	61
														MF001045.1_Human_respiratory_syncytial_virus_B_strain_6C3,cg	20															DQ279927.1_Human_herpesvirus_4_strain_AG876,cg	2			JX997163.1_Paramecium_bursaria_Chlorella_virus_CVM-1,_partial_genome	1			LT594108.1_Human_herpesvirus_1_isolate_1319_2005_genome_assembly,cg:_monopartite	1			LT594109.1_Human_herpesvirus_1_isolate_270_2007_genome_assembly,cg:_monopartite	2			U20220.1_Cucumber_mosaic_virus_1a_protein_gene,_complete_cds	61
														KY249672.1_Human_respiratory_syncytial_virus_B_isolate_RSVB/England198/2012,cg	20															NW_007585112.1_Cynoglossus_semilaevis_isolate_Cse_v1.0_unplaced_genomic_scaffold,_Cse_v1.0_scaffold1699,wgss	2			BK000408.1_TPA:_Human_adenovirus_type_5,cg	1			AB010300.1_Garlic_virus_A_genomic_RNA,cg	1			LT576867.1_Herpes_simplex_virus_(type_1_/_strain_17)_genome_assembly,_chromosome:_I	2			BK000407.1_TPA:_Human_adenovirus_type_2,cg	56
														KY249671.1_Human_respiratory_syncytial_virus_B_isolate_RSVB/England864/2012,cg	19															LN827555.1_Human_herpesvirus_4_genome_assembly_X50-7,_segment_:_I	1			LT608134.1_Herpes_simplex_virus_(type_1_/_strain_17)_genome_assembly,_chromosome:_I	1			DQ491001.1_Paramecium_bursaria_chlorella_virus_MT325_genomic_sequence	1			AY027810.2_Papaya_ringspot_virus_W_isolate_CI,cg	2			FJ268746.1_Cucumber_mosaic_virus_isolate_Cah1_segment_RNA3,cs	54
														KY249666.1_Human_respiratory_syncytial_virus_B_isolate_RSVB/England400/2013,cg	18															LN824207.1_Human_herpesvirus_4_genome_assembly_pLCL-TRL1-pre,_segment_:_I	1			LT576868.1_Herpes_simplex_virus_(type_1_/_strain_17)_genome_assembly,_chromosome:_I	1							LT594106.1_Human_herpesvirus_1_isolate_2158_2007_genome_assembly,cg:_monopartite	1			KC527734.1_Cucumber_mosaic_virus_isolate_RP5_segment_RNA3,cs	54
														KY249662.1_Human_respiratory_syncytial_virus_B_isolate_RSVB/England080/2013,cg	18															LN824208.1_Human_herpesvirus_4_genome_assembly_Akata,_segment_:_I	1			KY040274.1_Molluscum_contagiosum_virus_subtype_2_isolate_Madrid_2016_1,cg	1							LT594457.1_Human_herpesvirus_1_isolate_132_1998_genome_assembly,cg:_monopartite	1			KC527795.1_Cucumber_mosaic_virus_isolate_RP22_segment_RNA1,cs	50
														MG642064.1_Human_respiratory_syncytial_virus_B_strain_RSVB/Homo_sapiens/USA/MCRSV_280/1995,cg	17															X74465.1_Human_papillomavirus_type_10_genomic_DNA	1			LT594192.1_Human_herpesvirus_1_isolate_160_1982_genome_assembly,cg:_monopartite	1							X14112.1_Human_herpesvirus_1_complete_genome	1			JN054635.1_Cucumber_mosaic_virus_strain_CLW2_movement_protein_and_coat_protein_genes,_complete_cds	49
														KY249674.1_Human_respiratory_syncytial_virus_B_isolate_RSVB/England127/2012,cg	16															LN827578.1_Human_herpesvirus_4_genome_assembly_sLCL-IS1.13,_chromosome_:_I	1											LT594105.1_Human_herpesvirus_1_isolate_172_2010_genome_assembly,cg:_monopartite	1			HE962480.1_Cucumber_mosaic_virus_RNA3_complete_segment,_genomic_RNA,_strain_Vir	48
														KY249659.1_Human_respiratory_syncytial_virus_B_isolate_RSVB/England595/2013,cg	16															LN827799.1_Human_herpesvirus_4_genome_assembly_sLCL-IM1.16,_segment_:_I	1											LT576868.1_Herpes_simplex_virus_(type_1_/_strain_17)_genome_assembly,_chromosome:_I	1			AJ276481.1_Cucumber_mosaic_virus_(strain_Mf),_complete_RNA3_segment	47
														KY249676.1_Human_respiratory_syncytial_virus_B_isolate_RSVB/England133/2012,cg	16															LS992243.1_Human_gammaherpesvirus_4_isolate_Human_herpesvirus_4_genome_assembly,_chromosome:_I	1															LC066470.1_Cucumber_mosaic_virus_genomic_RNA,_segment:_3,cs,_isolate:_IRN-REY6	46
														KY249675.1_Human_respiratory_syncytial_virus_B_isolate_RSVB/England306/2012,cg	16															BK000408.1_TPA:_Human_adenovirus_type_5,cg	1															EF213025.1_Cucumber_mosaic_virus_strain_CTL_segment_RNA3,cs	45
														MG642042.1_Human_respiratory_syncytial_virus_B_strain_RSVB/Homo_sapiens/USA/MCRSV_242/1985,cg	10															LN827575.1_Human_herpesvirus_4_genome_assembly_sLCL-IS1.14,_segment_:_I	1															HE971694.1_Cucumber_mosaic_virus_partial_CP_gene_for_coat_protein,_segment_RNA3,_genomic_RNA,_isolate_B2.2/09	45
														AF013254.1_Human_respiratory_syncytial_virus_wildtype_strain_B1,cg	10															NC_024311.1_Cynoglossus_semilaevis_isolate_Cse_v1.0_chromosome_5,_Cse_v1.0,wgss	1															KC527794.1_Cucumber_mosaic_virus_isolate_RP20_segment_RNA1,cs	45
														MG642039.1_Human_respiratory_syncytial_virus_B_strain_RSVB/Homo_sapiens/USA/MCRSV_268/1985,cg	9															LS992244.1_Human_gammaherpesvirus_4_isolate_Human_herpesvirus_4_genome_assembly,_chromosome:_I	1															KP033524.1_Cucumber_mosaic_virus_isolate_GTN_segment_RNA1,cs	45
														MG642051.1_Human_respiratory_syncytial_virus_B_strain_RSVB/Homo_sapiens/USA/MCRSV_249/1986,cg	8																															HE971671.1_Cucumber_mosaic_virus_partial_CP_gene_for_coat_protein,_segment_RNA3,_genomic_RNA,_isolate_DHH1.2/09	43
														KY249661.1_Human_respiratory_syncytial_virus_B_isolate_RSVB/England015/2013,cg	8																															AJ580953.1_Cucumber_mosaic_virus_1a_gene,_genomic_RNA,_strain_Ns	43
														MG642043.1_Human_respiratory_syncytial_virus_B_strain_RSVB/Homo_sapiens/USA/MCRSV_228/1982,cg	8																															KC527707.1_Cucumber_mosaic_virus_isolate_RP24_segment_RNA2,cs	43
														MG642027.1_Human_respiratory_syncytial_virus_B_strain_RSVB/Homo_sapiens/USA/MCRSV_275/1991,cg	6																															LC066435.1_Cucumber_mosaic_virus_genomic_RNA,_segment:_1,cs,_isolate:_OD291J	42
														MG642049.1_Human_respiratory_syncytial_virus_B_strain_RSVB/Homo_sapiens/USA/MCRSV_278/1993,cg	6																															KC527733.1_Cucumber_mosaic_virus_isolate_RP4_segment_RNA3,cs	41
														KY674983.1_Human_respiratory_syncytial_virus_B_strain_16F10,cg	6																															MG182148.1_Cucumber_mosaic_virus_strain_K_2016_segment_RNA1,cs	40
														MG642053.1_UNVERIFIED:_Human_respiratory_syncytial_virus_B_strain_RSVB/Homo_sapiens/USA/MCRSV_210/1980_cRNA_sequence	6																															KT004542.1_Cucumber_mosaic_virus_strain_WN1_segment_RNA1,cs	39
														NC_024310.1_Cynoglossus_semilaevis_isolate_Cse_v1.0_chromosome_4,_Cse_v1.0,wgss	6																															HQ283393.1_Cucumber_mosaic_virus_isolate_SFQT1-2_segment_RNA3,cs	38
														KF893260.1_Human_respiratory_syncytial_virus_B_strain_N2,cg	6																															NC_045512.2_Wuhan_seafood_market_pneumonia_virus_isolate_Wuhan-Hu-1,cg	38
														MG642046.1_Human_respiratory_syncytial_virus_B_strain_RSVB/Homo_sapiens/USA/MCRSV_239/1984,cg	5																															KJ400002.1_Cucumber_mosaic_virus_isolate_209_segment_RNA1,cs	37
														MG642062.1_Human_respiratory_syncytial_virus_B_strain_RSVB/Homo_sapiens/USA/MCRSV_282/1996,cg	5																															LC066464.1_Cucumber_mosaic_virus_genomic_RNA,_segment:_3,cs,_isolate:_IRN-Khs1	36
														MG642082.1_Human_respiratory_syncytial_virus_B_strain_RSVB/Homo_sapiens/USA/MCRSV_257/1989,cg	5																															KC527710.1_Cucumber_mosaic_virus_isolate_RP27_segment_RNA2,cs	35
														MG642066.1_Human_respiratory_syncytial_virus_B_strain_RSVB/Homo_sapiens/USA/MCRSV_273/1990,cg	4																															LC066473.1_Cucumber_mosaic_virus_genomic_RNA,_segment:_3,cs,_isolate:_IRN-REY10	34
														MG642037.1_Human_respiratory_syncytial_virus_B_strain_RSVB/Homo_sapiens/USA/MCRSV_208/1980,cg	4																															KY794709.1_Cucumber_mosaic_virus_isolate_Met_segment_RNA2,cs	34
														MG642068.1_Human_respiratory_syncytial_virus_B_strain_RSVB/Homo_sapiens/USA/MCRSV_252/1987,cg	4																															FJ947080.1_Human_papillomavirus_type_115_isolate_GC02,cg	33
														MG642078.1_Human_respiratory_syncytial_virus_B_strain_RSVB/Homo_sapiens/USA/MCRSV_230/1982,cg	4																															KC527768.1_Cucumber_mosaic_virus_isolate_RP44_segment_RNA3,cs	33
														MG642076.1_Human_respiratory_syncytial_virus_B_strain_RSVB/Homo_sapiens/USA/MCRSV_251/1987,cg	4																															LC066407.1_Cucumber_mosaic_virus_genomic_RNA,_segment:_3,cs,_isolate:_GFD560J	33
														MG642054.1_Human_respiratory_syncytial_virus_B_strain_RSVB/Homo_sapiens/USA/MCRSV_276/1991,cg	3																															KC527700.1_Cucumber_mosaic_virus_isolate_RP16_segment_RNA2,cs	33
														NW_007592389.1_Cynoglossus_semilaevis_isolate_Cse_v1.0_unplaced_genomic_scaffold,_Cse_v1.0_scaffold6853,wgss	3																															KC693009.1_Cucumber_mosaic_virus_isolate_ZMBJ_segment_RNA3,cs	32
														NC_045512.2_Wuhan_seafood_market_pneumonia_virus_isolate_Wuhan-Hu-1,cg	3																															LC066414.1_Cucumber_mosaic_virus_genomic_RNA,_segment:_1,cs,_isolate:_MD965J	32
														MG642057.1_Human_respiratory_syncytial_virus_B_strain_RSVB/Homo_sapiens/USA/MCRSV_241/1984,cg	3																															LC066476.1_Cucumber_mosaic_virus_genomic_RNA,_segment:_3,cs,_isolate:_IRN-SisSh64	31
														MG642065.1_Human_respiratory_syncytial_virus_B_strain_RSVB/Homo_sapiens/USA/MCRSV_225/1981,cg	3																															KC527735.1_Cucumber_mosaic_virus_isolate_RP6_segment_RNA3,cs	31
														MG642045.1_Human_respiratory_syncytial_virus_B_strain_RSVB/Homo_sapiens/USA/MCRSV_205/1979,cg	3																															HE962479.1_Cucumber_mosaic_virus_RNA2_complete_segment,_genomic_RNA,_strain_Vir	31
														MG642044.1_Human_respiratory_syncytial_virus_B_strain_RSVB/Homo_sapiens/USA/MCRSV_231/1982,cg	2																															J01917.1_Adenovirus_type_2,cg	29
														MG642072.1_Human_respiratory_syncytial_virus_B_strain_RSVB/Homo_sapiens/USA/MCRSV_274/1991,cg	2																															MG182150.1_Cucumber_mosaic_virus_strain_K_2016_segment_RNA3,cs	27
														MG642047.1_Human_respiratory_syncytial_virus_B_strain_RSVB/Homo_sapiens/USA/MCRSV_213/1980,cg	2																															HE971660.1_Cucumber_mosaic_virus_partial_CP_gene_for_coat_protein,_segment_RNA3,_genomic_RNA,_isolate_BC3.3/09	26
														KY684110.1_Klosneuvirus_KNV1_Klosneuvirus_3_genomic_sequence	2																															KC527785.1_Cucumber_mosaic_virus_isolate_RP11_segment_RNA1,cs	25
														MG642036.1_Human_respiratory_syncytial_virus_B_strain_RSVB/Homo_sapiens/USA/MCRSV_271/1989,cg	2																															D16405.1_Cucumber_mosaic_virus_genes_for_movement_protein_and_viral_coat_protein,_complete_cds	24
														KM982402.1_UNVERIFIED:_Acanthamoeba_polyphaga_mimivirus_strain_Kroon,cg	2																															LC066506.1_Cucumber_mosaic_virus_genomic_RNA,_segment:_3,cs,_isolate:_TUR81	24
														MG642059.1_Human_respiratory_syncytial_virus_B_strain_RSVB/Homo_sapiens/USA/MCRSV_267/1983,cg	2																															KX660756.1_Cucumber_mosaic_virus_isolate_Anhui_segment_RNA1,cs	23
														MG642025.1_Human_respiratory_syncytial_virus_B_strain_RSVB/Homo_sapiens/USA/MCRSV_232/1982,cg	2																															KC527786.1_Cucumber_mosaic_virus_isolate_RP12_segment_RNA1,cs	23
														U60315.1_Molluscum_contagiosum_virus_subtype_1,cg	1																															KC527718.1_Cucumber_mosaic_virus_isolate_RP38_segment_RNA2,cs	23
														M81413.1_Pepper_mild_mottle_virus_strain_S_genomic_sequence	1																															KM272278.1_Cucumber_mosaic_virus_strain_KO_segment_RNA2,cs	21
														NW_007587064.1_Cynoglossus_semilaevis_isolate_Cse_v1.0_unplaced_genomic_scaffold,_Cse_v1.0_scaffold5878,wgss	1																															KC527762.1_Cucumber_mosaic_virus_isolate_RP35_segment_RNA3,cs	21
														AF440570.1_Shrimp_white_spot_syndrome_virus,cg	1																															KC527721.1_Cucumber_mosaic_virus_isolate_RP41_segment_RNA2,cs	21
														NC_024328.1_Cynoglossus_semilaevis_isolate_Cse_v1.0_chromosome_Z,_Cse_v1.0,wgss	1																															AM183116.1_Cucumber_mosaic_virus_(strain_Pl-1)_genomic_RNA_segment_RNA3,_strain_Pl-1,cs	21
														JX997154.1_Paramecium_bursaria_Chlorella_virus_AP110A,_partial_genome	1																															FJ268744.1_Cucumber_mosaic_virus_isolate_Cah1_segment_RNA1,cs	21
														NW_007591416.1_Cynoglossus_semilaevis_isolate_Cse_v1.0_unplaced_genomic_scaffold,_Cse_v1.0_scaffold6273,wgss	1																															KC527787.1_Cucumber_mosaic_virus_isolate_RP13_segment_RNA1,cs	20
																																														HF572914.1_Cucumber_mosaic_virus_segment_RNA1,_genomic_RNA,_isolate_Bn57	19
																																														KC527697.1_Cucumber_mosaic_virus_isolate_RP13_segment_RNA2,cs	19
																																														LC363917.1_Cucumber_mosaic_virus_Co-46_genomic_RNA,_segment:_RNA1,cs	19
																																														NC_024327.1_Cynoglossus_semilaevis_isolate_Cse_v1.0_chromosome_W,_Cse_v1.0,wgss	19
																																														HE962478.1_Cucumber_mosaic_virus_RNA1_complete_segment,_genomic_RNA,_strain_Vir	19
																																														LC066411.1_Cucumber_mosaic_virus_genomic_RNA,_segment:_1,cs,_isolate:_KD302J	18
																																														KT004544.1_Cucumber_mosaic_virus_strain_WN1_segment_RNA3,cs	18
																																														KC527719.1_Cucumber_mosaic_virus_isolate_RP39_segment_RNA2,cs	18
																																														KT350981.1_Cucumber_mosaic_virus_isolate_ZMBJ_segment_RNA2,cs	17
																																														KC527747.1_Cucumber_mosaic_virus_isolate_RP18_segment_RNA3,cs	17
																																														LC066426.1_Cucumber_mosaic_virus_genomic_RNA,_segment:_1,cs,_isolate:_NID045J	16
																																														AB124835.1_Cucumber_mosaic_virus_RNA_2_segment,cs	16
																																														JN054637.1_Cucumber_mosaic_virus_strain_CLW2_RNA-dependent_RNA_polymerase_and_2b_protein_genes,_complete_cds	16
																																														LC066486.1_Cucumber_mosaic_virus_genomic_RNA,_segment:_1,cs,_isolate:_IRN-WRN9	16
																																														AM183115.1_Cucumber_mosaic_virus_(strain_Pl-1)_genomic_RNA_segment_RNA2,_strain_Pl-1,cs	16
																																														KC527743.1_Cucumber_mosaic_virus_isolate_RP14_segment_RNA3,cs	15
																																														LC066427.1_Cucumber_mosaic_virus_genomic_RNA,_segment:_2,cs,_isolate:_NID045J	15
																																														LC363918.1_Cucumber_mosaic_virus_Co-46_genomic_RNA,_segment:_RNA2,cs	15
																																														KT310082.1_Cucumber_mosaic_virus_isolate_RPDJ_segment_RNA3,cs	15
																																														LC066516.1_Cucumber_mosaic_virus_genomic_RNA,_segment:_1,cs,_isolate:_TUR89	14
																																														KC527694.1_Cucumber_mosaic_virus_isolate_RP10_segment_RNA2,cs	13
																																														KU255787.1_Cucumber_mosaic_virus_strain_DS_segment_RNA1,cs	13
																																														D28779.1_Cucumber_mosaic_virus_genes_for_2a,_2b,_complete_cds,_segment_2	13
																																														KC527741.1_Cucumber_mosaic_virus_isolate_RP12_segment_RNA3,cs	13
																																														AB506797.1_Cucumber_mosaic_virus_RNA_3,cs,_strain:_Li	13
																																														KC527760.1_Cucumber_mosaic_virus_isolate_RP33_segment_RNA3,cs	13
																																														LC066448.1_Cucumber_mosaic_virus_genomic_RNA,_segment:_2,cs,_isolate:_TRT611J	13
																																														KC527685.1_Cucumber_mosaic_virus_isolate_RP1_segment_RNA2,cs	13
																																														KU255788.1_Cucumber_mosaic_virus_strain_DS_segment_RNA2,cs	13
																																														MF588679.1_Betapapillomavirus_1_isolate_Beta01_w15c111,cg	13
																																														KC527746.1_Cucumber_mosaic_virus_isolate_RP17_segment_RNA3,cs	13
																																														DQ279927.1_Human_herpesvirus_4_strain_AG876,cg	12
																																														KC527767.1_Cucumber_mosaic_virus_isolate_RP42_segment_RNA3,cs	12
																																														KU255790.1_Cucumber_mosaic_virus_strain_DA_segment_RNA1,cs	12
																																														KU255792.1_Cucumber_mosaic_virus_strain_DA_segment_RNA3,cs	12
																																														KC527759.1_Cucumber_mosaic_virus_isolate_RP31_segment_RNA3,cs	12
																																														KC527730.1_Cucumber_mosaic_virus_isolate_RP1_segment_RNA3,cs	11
																																														KP033526.1_Cucumber_mosaic_virus_isolate_GTN_segment_RNA3,cs	11
																																														LC066417.1_Cucumber_mosaic_virus_genomic_RNA,_segment:_1,cs,_isolate:_MED303J	11
																																														AJ507799.2_Human_herpesvirus_4_complete_wild_type_genome	11
																																														LC339511.1_Cucumber_mosaic_virus_Ma-1_genomic_RNA,_segment:_RNA3,cs	11
																																														KC527695.1_Cucumber_mosaic_virus_isolate_RP11_segment_RNA2,cs	11
																																														LC066489.1_Cucumber_mosaic_virus_genomic_RNA,_segment:_1,cs,_isolate:_IRN-WRN15	11
																																														D28780.1_Cucumber_mosaic_virus_genes_for_3a,_coat_protein,_complete_cds,_segment_3	11
																																														FJ268745.1_Cucumber_mosaic_virus_isolate_Cah1_segment_RNA2,cs	11
																																														KC527748.1_Cucumber_mosaic_virus_isolate_RP19_segment_RNA3,cs	10
																																														LC066467.1_Cucumber_mosaic_virus_genomic_RNA,_segment:_3,cs,_isolate:_IRN-REY4	10
																																														AY429435.1_Cucumber_mosaic_virus_segment_RNA1,cs	10
																																														LC066513.1_Cucumber_mosaic_virus_genomic_RNA,_segment:_1,cs,_isolate:_TUR86	10
																																														JX014246.1_Cucumber_mosaic_virus_isolate_Va_segment_RNA1,cs	10
																																														LC066450.1_Cucumber_mosaic_virus_genomic_RNA,_segment:_1,cs,_isolate:_TYD083J	10
																																														LT594107.1_Human_herpesvirus_1_isolate_3083_2008_genome_assembly,cg:_monopartite	9
																																														KC527761.1_Cucumber_mosaic_virus_isolate_RP34_segment_RNA3,cs	9
																																														KJ400003.1_Cucumber_mosaic_virus_isolate_209_segment_RNA2,cs	9
																																														BK000408.1_TPA:_Human_adenovirus_type_5,cg	9
																																														KC527818.1_Cucumber_mosaic_virus_isolate_RP49_segment_RNA1,cs	9
																																														AB506800.1_Cucumber_mosaic_virus_RNA_3,cs,_strain:_LiCB	9
																																														KC019299.1_Cucumber_mosaic_virus_segment_RNA1,cs	9
																																														LC066510.1_Cucumber_mosaic_virus_genomic_RNA,_segment:_1,cs,_isolate:_TUR84	9
																																														KC527752.1_Cucumber_mosaic_virus_isolate_RP24_segment_RNA3,cs	9
																																														KC527745.1_Cucumber_mosaic_virus_isolate_RP16_segment_RNA3,cs	9
																																														MG025947.1_Cucumber_mosaic_virus_isolate_Rs_segment_RNA_1,cs	9
																																														HQ874434.1_Cucumber_mosaic_virus_isolate_Gd_1a_protein_(1a)_gene,_complete_cds	8
																																														BK005234.1_TPA:_Human_adenovirus_type_1,cg	8
																																														LC066408.1_Cucumber_mosaic_virus_genomic_RNA,_segment:_1,cs,_isolate:_IWD041J	8
																																														KC527742.1_Cucumber_mosaic_virus_isolate_RP13_segment_RNA3,cs	8
																																														KC527766.1_Cucumber_mosaic_virus_isolate_RP41_segment_RNA3,cs	8
																																														KU947029.1_Cucumber_mosaic_virus_segment_RNA1,cs	8
																																														KC527744.1_Cucumber_mosaic_virus_isolate_RP15_segment_RNA3,cs	7
																																														KC527753.1_Cucumber_mosaic_virus_isolate_RP25_segment_RNA3,cs	7
																																														JN180309.1_Cucumber_mosaic_virus_segment_RNA1,cs	7
																																														KC527686.1_Cucumber_mosaic_virus_isolate_RP2_segment_RNA2,cs	7
																																														LT594106.1_Human_herpesvirus_1_isolate_2158_2007_genome_assembly,cg:_monopartite	7
																																														EF213023.1_Cucumber_mosaic_virus_strain_CTL_segment_RNA1,cs	7
																																														LT594111.1_Human_herpesvirus_1_isolate_1394_2005_genome_assembly,cg:_monopartite	7
																																														KC527789.1_Cucumber_mosaic_virus_isolate_RP15_segment_RNA1,cs	7
																																														KC527750.1_Cucumber_mosaic_virus_isolate_RP22_segment_RNA3,cs	7
																																														KY040274.1_Molluscum_contagiosum_virus_subtype_2_isolate_Madrid_2016_1,cg	7
																																														LC066441.1_Cucumber_mosaic_virus_genomic_RNA,_segment:_1,cs,_isolate:_OGI12J3	6
																																														AY429436.1_Cucumber_mosaic_virus_segment_RNA2,cs	6
																																														KC527763.1_Cucumber_mosaic_virus_isolate_RP38_segment_RNA3,cs	6
																																														KC527772.1_Cucumber_mosaic_virus_isolate_RP48_segment_RNA3,cs	6
																																														HE971600.1_Cucumber_mosaic_virus_partial_CP_gene_for_coat_protein,_segment_RNA3,_genomic_RNA,_isolate_DH1.8/08	6
																																														X56147.1_Human_papillomavirus_type_41	6
																																														KC527812.1_Cucumber_mosaic_virus_isolate_RP42_segment_RNA1,cs	6
																																														KC527739.1_Cucumber_mosaic_virus_isolate_RP10_segment_RNA3,cs	6
																																														KC527799.1_Cucumber_mosaic_virus_isolate_RP26_segment_RNA1,cs	6
																																														FM955842.1_Human_papillomavirus_type_113,cg	6
																																														LC066487.1_Cucumber_mosaic_virus_genomic_RNA,_segment:_2,cs,_isolate:_IRN-WRN9	6
																																														LC066477.1_Cucumber_mosaic_virus_genomic_RNA,_segment:_1,cs,_isolate:_IRN-TIm1	6
																																														KC527738.1_Cucumber_mosaic_virus_isolate_RP9_segment_RNA3,cs	6
																																														LC066490.1_Cucumber_mosaic_virus_genomic_RNA,_segment:_2,cs,_isolate:_IRN-WRN15	5
																																														KC527757.1_Cucumber_mosaic_virus_isolate_RP29_segment_RNA3,cs	5
																																														KU947031.1_Cucumber_mosaic_virus_segment_RNA3,cs	5
																																														KC527807.1_Cucumber_mosaic_virus_isolate_RP35_segment_RNA1,cs	5
																																														LC066511.1_Cucumber_mosaic_virus_genomic_RNA,_segment:_2,cs,_isolate:_TUR84	5
																																														LC066423.1_Cucumber_mosaic_virus_genomic_RNA,_segment:_1,cs,_isolate:_ND278J	5
																																														LT576869.1_Herpes_simplex_virus_(type_1_/_strain_17)_genome_assembly,_chromosome:_I	5
																																														HE971632.1_Cucumber_mosaic_virus_partial_CP_gene_for_coat_protein,_segment_RNA3,_genomic_RNA,_isolate_NU5/09	5
																																														NC_030848.1_Haloarcula_californiae_icosahedral_virus_1,cg	5
																																														KC527699.1_Cucumber_mosaic_virus_isolate_RP15_segment_RNA2,cs	5
																																														Y15173.1_Human_papillomavirus_type_75_E6,_E7,_E1,_E2,_E4,_L2,_and_L1_genes	5
																																														HE971612.1_Cucumber_mosaic_virus_partial_CP_gene_for_coat_protein,_segment_RNA3,_genomic_RNA,_isolate_AOU1.8/09	5
																																														KC527790.1_Cucumber_mosaic_virus_isolate_RP16_segment_RNA1,cs	5
																																														LC066461.1_Cucumber_mosaic_virus_genomic_RNA,_segment:_3,cs,_isolate:_IRN-BRE5	5
																																														KC527764.1_Cucumber_mosaic_virus_isolate_RP39_segment_RNA3,cs	5
																																														LC066438.1_Cucumber_mosaic_virus_genomic_RNA,_segment:_1,cs,_isolate:_OGI11X2	5
																																														KC527796.1_Cucumber_mosaic_virus_isolate_RP23_segment_RNA1,cs	5
																																														AY429437.1_Cucumber_mosaic_virus_segment_RNA3,cs	5
																																														KC527693.1_Cucumber_mosaic_virus_isolate_RP9_segment_RNA2,cs	5
																																														AB368496.1_Cucumber_mosaic_virus_genomic_RNA,_segment_RNA1,cs,_isolate:_42CM	5
																																														KC527703.1_Cucumber_mosaic_virus_isolate_RP19_segment_RNA2,cs	5
																																														LC066507.1_Cucumber_mosaic_virus_genomic_RNA,_segment:_1,cs,_isolate:_TUR83	5
																																														KC527723.1_Cucumber_mosaic_virus_isolate_RP44_segment_RNA2,cs	5
																																														KC527740.1_Cucumber_mosaic_virus_isolate_RP11_segment_RNA3,cs	4
																																														KT004543.1_Cucumber_mosaic_virus_strain_WN1_segment_RNA2,cs	4
																																														LC066405.1_Cucumber_mosaic_virus_genomic_RNA,_segment:_1,cs,_isolate:_GFD560J	4
																																														KC527808.1_Cucumber_mosaic_virus_isolate_RP38_segment_RNA1,cs	4
																																														KC527816.1_Cucumber_mosaic_virus_isolate_RP47_segment_RNA1,cs	4
																																														JN180310.1_Cucumber_mosaic_virus_segment_RNA2,cs	4
																																														LC066429.1_Cucumber_mosaic_virus_genomic_RNA,_segment:_1,cs,_isolate:_NND454J	4
																																														NC_001354.1_Human_papillomavirus_type_41,cg	4
																																														KC527784.1_Cucumber_mosaic_virus_isolate_RP10_segment_RNA1,cs	4
																																														KC527736.1_Cucumber_mosaic_virus_isolate_RP7_segment_RNA3,cs	4
																																														KC527805.1_Cucumber_mosaic_virus_isolate_RP33_segment_RNA1,cs	4
																																														KC527737.1_Cucumber_mosaic_virus_isolate_RP8_segment_RNA3,cs	4
																																														HQ413315.1_Human_adenovirus_6_isolate_Tonsil_99,cg	4
																																														M81413.1_Pepper_mild_mottle_virus_strain_S_genomic_sequence	4
																																														HE971606.1_Cucumber_mosaic_virus_partial_CP_gene_for_coat_protein,_segment_RNA3,_genomic_RNA,_isolate_OSA3/09	4
																																														AB188234.1_Cucumber_mosaic_virus_RNA1_segment,cs,_isolate:CM95	4
																																														KC527797.1_Cucumber_mosaic_virus_isolate_RP24_segment_RNA1,cs	4
																																														DQ399550.1_Cucumber_mosaic_virus_strain_BX_segment_RNA3,cs	4
																																														HE971627.1_Cucumber_mosaic_virus_partial_CP_gene_for_coat_protein,_segment_RNA3,_genomic_RNA,_isolate_Z2.8/09	4
																																														KU255789.1_Cucumber_mosaic_virus_strain_DS_segment_RNA3,cs	4
																																														NC_024328.1_Cynoglossus_semilaevis_isolate_Cse_v1.0_chromosome_Z,_Cse_v1.0,wgss	4
																																														KP165580.1_Cucumber_mosaic_virus_isolate_PV0187_segment_RNA1_1a_protein_gene,_complete_cds	4
																																														KC527791.1_Cucumber_mosaic_virus_isolate_RP17_segment_RNA1,cs	4
																																														MF588678.1_Betapapillomavirus_1_isolate_Beta01_m292c10,cg	4
																																														EF202596.1_Cucumber_mosaic_virus_isolate_Tsh_segment_RNA2,cs	4
																																														AB188228.1_Cucumber_mosaic_virus_RNA1_segment,cs,_isolate:Mi	4
																																														KT310080.1_Cucumber_mosaic_virus_isolate_RPDJ_segment_RNA1,cs	4
																																														KM272277.1_Cucumber_mosaic_virus_strain_KO_segment_RNA1,cs	4
																																														KC527819.1_Cucumber_mosaic_virus_isolate_RP50_segment_RNA1,cs	4
																																														AB079889.1_Cucumber_mosaic_virus_RNA1,cs,_strain:36a1	4
																																														HE971687.1_Cucumber_mosaic_virus_partial_CP_gene_for_coat_protein,_segment_RNA3,_genomic_RNA,_isolate_RJ1.1/09	4
																																														KC527765.1_Cucumber_mosaic_virus_isolate_RP40_segment_RNA3,cs	4
																																														JN054636.1_Cucumber_mosaic_virus_strain_CLW2_putative_RNA_helicase_and_methyltransferase_gene,_complete_cds	3
																																														KC527722.1_Cucumber_mosaic_virus_isolate_RP42_segment_RNA2,cs	3
																																														LT594457.1_Human_herpesvirus_1_isolate_132_1998_genome_assembly,cg:_monopartite	3
																																														KC527804.1_Cucumber_mosaic_virus_isolate_RP31_segment_RNA1,cs	3
																																														KC527709.1_Cucumber_mosaic_virus_isolate_RP26_segment_RNA2,cs	3
																																														KC527688.1_Cucumber_mosaic_virus_isolate_RP4_segment_RNA2,cs	3
																																														HE971503.1_Cucumber_mosaic_virus_partial_ORF2a_gene_and_ORF2b_gene,_segment_RNA2,_genomic_RNA,_isolate_Z1.2/09	3
																																														KY886411.1_Cucumber_mosaic_virus_isolate_CMV-SP_segment_RNA3,cs	3
																																														LT576868.1_Herpes_simplex_virus_(type_1_/_strain_17)_genome_assembly,_chromosome:_I	3
																																														LC066402.1_Cucumber_mosaic_virus_genomic_RNA,_segment:_1,cs,_isolate:_EHD732J	3
																																														AB506799.1_Cucumber_mosaic_virus_RNA_2,cs,_strain:_LiCB	3
																																														KC527774.1_Cucumber_mosaic_virus_isolate_RP50_segment_RNA3,cs	3
																																														HE971626.1_Cucumber_mosaic_virus_partial_CP_gene_for_coat_protein,_segment_RNA3,_genomic_RNA,_isolate_Z2.6/09	3
																																														LT576871.1_Herpes_simplex_virus_(type_1_/_strain_17)_isolate_5B_genome_assembly,_chromosome:_I	3
																																														KC527813.1_Cucumber_mosaic_virus_isolate_RP44_segment_RNA1,cs	3
																																														KC527783.1_Cucumber_mosaic_virus_isolate_RP9_segment_RNA1,cs	3
																																														KC527717.1_Cucumber_mosaic_virus_isolate_RP35_segment_RNA2,cs	3
																																														LT576870.1_Herpes_simplex_virus_(type_1_/_strain_17)_genome_assembly,_chromosome:_I	3
																																														HE971668.1_Cucumber_mosaic_virus_partial_CP_gene_for_coat_protein,_segment_RNA3,_genomic_RNA,_isolate_T1.4/09	3
																																														LC066498.1_Cucumber_mosaic_virus_genomic_RNA,_segment:_1,cs,_isolate:_TUR4	3
																																														LC066454.1_Cucumber_mosaic_virus_genomic_RNA,_segment:_2,cs,_isolate:_YMD068J	3
																																														LC066424.1_Cucumber_mosaic_virus_genomic_RNA,_segment:_2,cs,_isolate:_ND278J	3
																																														HE971636.1_Cucumber_mosaic_virus_partial_CP_gene_for_coat_protein,_segment_RNA3,_genomic_RNA,_isolate_NU10/09	3
																																														HE971619.1_Cucumber_mosaic_virus_partial_CP_gene_for_coat_protein,_segment_RNA3,_genomic_RNA,_isolate_Z1.2/09	3
																																														HE971618.1_Cucumber_mosaic_virus_partial_CP_gene_for_coat_protein,_segment_RNA3,_genomic_RNA,_isolate_AOU2.9/09	3
																																														KC527724.1_Cucumber_mosaic_virus_isolate_RP45_segment_RNA2,cs	3
																																														KC527715.1_Cucumber_mosaic_virus_isolate_RP33_segment_RNA2,cs	3
																																														LC066401.1_Cucumber_mosaic_virus_genomic_RNA,_segment:_3,cs,_isolate:_AKD822J	3
																																														KC527798.1_Cucumber_mosaic_virus_isolate_RP25_segment_RNA1,cs	3
																																														LC066444.1_Cucumber_mosaic_virus_genomic_RNA,_segment:_1,cs,_isolate:_TKD766J	3
																																														LT608134.1_Herpes_simplex_virus_(type_1_/_strain_17)_genome_assembly,_chromosome:_I	3
																																														NC_024308.1_Cynoglossus_semilaevis_isolate_Cse_v1.0_chromosome_2,_Cse_v1.0,wgss	3
																																														KC527731.1_Cucumber_mosaic_virus_isolate_RP2_segment_RNA3,cs	3
																																														EU414796.1_Cucumber_mosaic_virus_isolate_CMV-RZ_1a_protein_(1a)_gene,_partial_cds	3
																																														KC527811.1_Cucumber_mosaic_virus_isolate_RP41_segment_RNA1,cs	3
																																														KC527701.1_Cucumber_mosaic_virus_isolate_RP17_segment_RNA2,cs	3
																																														KC527727.1_Cucumber_mosaic_virus_isolate_RP48_segment_RNA2,cs	3
																																														KC527732.1_Cucumber_mosaic_virus_isolate_RP3_segment_RNA3,cs	3
																																														KC527814.1_Cucumber_mosaic_virus_isolate_RP45_segment_RNA1,cs	3
																																														LT594108.1_Human_herpesvirus_1_isolate_1319_2005_genome_assembly,cg:_monopartite	3
																																														HE971624.1_Cucumber_mosaic_virus_partial_CP_gene_for_coat_protein,_segment_RNA3,_genomic_RNA,_isolate_Z2.3/09	2
																																														D00356.1_Cucumber_mosaic_virus_segment_RNA_1,_5'end_of_virion,_strain:_Fny	2
																																														MG470799.1_Cucumber_mosaic_virus_isolate_R1_segment_RNA2_RNA-dependent_RNA_polymerase_and_2b_protein_genes,_complete_cds	2
																																														KC527702.1_Cucumber_mosaic_virus_isolate_RP18_segment_RNA2,cs	2
																																														KC527698.1_Cucumber_mosaic_virus_isolate_RP14_segment_RNA2,cs	2
																																														LC066495.1_Cucumber_mosaic_virus_genomic_RNA,_segment:_1,cs,_isolate:_IRN-WRWA5	2
																																														LC066456.1_Cucumber_mosaic_virus_genomic_RNA,_segment:_1,cs,_isolate:_YMD069J	2
																																														LC066409.1_Cucumber_mosaic_virus_genomic_RNA,_segment:_2,cs,_isolate:_IWD041J	2
																																														EU414801.1_Cucumber_mosaic_virus_isolate_CMV-RZ_segment_RNA2_2a_protein_(2a)_and_2b_protein_(2b)_genes,_complete_cds	2
																																														EU414795.1_Cucumber_mosaic_virus_isolate_CMV-QZ_1a_protein_(1a)_gene,_complete_cds	2
																																														KC527810.1_Cucumber_mosaic_virus_isolate_RP40_segment_RNA1,cs	2
																																														MG602508.1_UNVERIFIED:_Acanthamoeba_polyphaga_mimivirus,_partial_genome	2
																																														AJ511989.1_Cucumber_mosaic_virus_2a_gene_for_RNA_dependent_RNA_polymerase_and_2b_gene_for_VIGS_supressor,_genomic_RNA	2
																																														KC527780.1_Cucumber_mosaic_virus_isolate_RP6_segment_RNA1,cs	2
																																														KC527769.1_Cucumber_mosaic_virus_isolate_RP45_segment_RNA3,cs	2
																																														HE971622.1_Cucumber_mosaic_virus_partial_CP_gene_for_coat_protein,_segment_RNA3,_genomic_RNA,_isolate_Z1.6/09	2
																																														LC066517.1_Cucumber_mosaic_virus_genomic_RNA,_segment:_2,cs,_isolate:_TUR89	2
																																														KC527714.1_Cucumber_mosaic_virus_isolate_RP31_segment_RNA2,cs	2
																																														KC527779.1_Cucumber_mosaic_virus_isolate_RP5_segment_RNA1,cs	2
																																														KC527802.1_Cucumber_mosaic_virus_isolate_RP29_segment_RNA1,cs	2
																																														KC527687.1_Cucumber_mosaic_virus_isolate_RP3_segment_RNA2,cs	2
																																														LC066501.1_Cucumber_mosaic_virus_genomic_RNA,_segment:_1,cs,_isolate:_TUR54	2
																																														KC527720.1_Cucumber_mosaic_virus_isolate_RP40_segment_RNA2,cs	2
																																														HE971616.1_Cucumber_mosaic_virus_partial_CP_gene_for_coat_protein,_segment_RNA3,_genomic_RNA,_isolate_AOU2.4/09	2
																																														KC527712.1_Cucumber_mosaic_virus_isolate_RP29_segment_RNA2,cs	2
																																														HE971620.1_Cucumber_mosaic_virus_partial_CP_gene_for_coat_protein,_segment_RNA3,_genomic_RNA,_isolate_Z1.4/09	2
																																														HE971631.1_Cucumber_mosaic_virus_partial_CP_gene_for_coat_protein,_segment_RNA3,_genomic_RNA,_isolate_NU3/09	2
																																														KC527729.1_Cucumber_mosaic_virus_isolate_RP50_segment_RNA2,cs	2
																																														LT594110.1_Human_herpesvirus_1_isolate_66_2007_genome_assembly,cg:_monopartite	2
																																														MG470798.1_Cucumber_mosaic_virus_isolate_R1_segment_RNA1_ORF1_gene,_complete_cds	2
																																														AB368500.1_Cucumber_mosaic_virus_isolate_PF_segment_RNA2,cs	2
																																														KC527782.1_Cucumber_mosaic_virus_isolate_RP8_segment_RNA1,cs	2
																																														LC066505.1_Cucumber_mosaic_virus_genomic_RNA,_segment:_2,cs,_isolate:_TUR81	2
																																														LC066480.1_Cucumber_mosaic_virus_genomic_RNA,_segment:_1,cs,_isolate:_IRN-TVRa26	2
																																														HE971669.1_Cucumber_mosaic_virus_partial_CP_gene_for_coat_protein,_segment_RNA3,_genomic_RNA,_isolate_T1.8/09	2
																																														LC066508.1_Cucumber_mosaic_virus_genomic_RNA,_segment:_2,cs,_isolate:_TUR83	2
																																														AB920561.1_Cucumber_mosaic_virus_genomic_RNA,_segment_RNA1,cs,_strain:_m1	2
																																														KC527770.1_Cucumber_mosaic_virus_isolate_RP46_segment_RNA3,cs	2
																																														KC527773.1_Cucumber_mosaic_virus_isolate_RP49_segment_RNA3,cs	2
																																														KP165582.1_Cucumber_mosaic_virus_isolate_PV0187_segment_RNA3_3a_protein_and_3b_protein_genes,_complete_cds	2
																																														KR535605.1_Cucumber_mosaic_virus_isolate_CMV-KoPF_segment_RNA1,cs	2
																																														HE971476.1_Cucumber_mosaic_virus_partial_ORF2a_gene_and_ORF2b_gene,_segment_RNA2,_genomic_RNA,_isolate_DH1.8/08	2
																																														KC527788.1_Cucumber_mosaic_virus_isolate_RP14_segment_RNA1,cs	1
																																														HE971440.1_Cucumber_mosaic_virus_partial_ORF1a_gene_for_helicase,_segment_RNA1,_genomic_RNA,_isolate_DHH3.8/09	1
																																														KC527756.1_Cucumber_mosaic_virus_isolate_RP28_segment_RNA3,cs	1
																																														LC066472.1_Cucumber_mosaic_virus_genomic_RNA,_segment:_2,cs,_isolate:_IRN-REY10	1
																																														KC527803.1_Cucumber_mosaic_virus_isolate_RP30_segment_RNA1,cs	1
																																														LC066499.1_Cucumber_mosaic_virus_genomic_RNA,_segment:_2,cs,_isolate:_TUR4	1
																																														LC066471.1_Cucumber_mosaic_virus_genomic_RNA,_segment:_1,cs,_isolate:_IRN-REY10	1
																																														AB506795.1_Cucumber_mosaic_virus_RNA_1,cs,_strain:_Li	1
																																														HE971634.1_Cucumber_mosaic_virus_partial_CP_gene_for_coat_protein,_segment_RNA3,_genomic_RNA,_isolate_NU7/09	1
																																														AM183119.1_Cucumber_mosaic_virus_(strain_Ri-8)_genomic_RNA_segment_RNA3,_strain_Ri-8,cs	1
																																														LT594105.1_Human_herpesvirus_1_isolate_172_2010_genome_assembly,cg:_monopartite	1
																																														GU327366.1_Cucumber_mosaic_virus_strain_Z1_segment_RNA-1,cs	1
																																														LC066466.1_Cucumber_mosaic_virus_genomic_RNA,_segment:_2,cs,_isolate:_IRN-REY4	1
																																														KC527691.1_Cucumber_mosaic_virus_isolate_RP7_segment_RNA2,cs	1
																																														HE971702.1_Cucumber_mosaic_virus_partial_CP_gene_for_coat_protein,_segment_RNA3,_genomic_RNA,_isolate_UK73/96	1
																																														AB188233.1_Cucumber_mosaic_virus_RNA3_segment,cs,_isolate:Fuka4-4	1
																																														GU327363.1_Cucumber_mosaic_virus_strain_Rb_segment_RNA-1,cs	1
																																														LC066504.1_Cucumber_mosaic_virus_genomic_RNA,_segment:_1,cs,_isolate:_TUR81	1
																																														LC066457.1_Cucumber_mosaic_virus_genomic_RNA,_segment:_2,cs,_isolate:_YMD069J	1
																																														D00355.1_Cucumber_mosaic_virus_gene_for_large_ORF,_complete_cds,_RNA2	1
																																														KC527809.1_Cucumber_mosaic_virus_isolate_RP39_segment_RNA1,cs	1
																																														MG779341.1_Bandra_megavirus_isolate_KK-1_genomic_sequence	1
																																														LC066502.1_Cucumber_mosaic_virus_genomic_RNA,_segment:_2,cs,_isolate:_TUR54	1
																																														GU327368.1_Cucumber_mosaic_virus_strain_Z1_segment_RNA-3,cs	1
																																														X14112.1_Human_herpesvirus_1_complete_genome	1
																																														KX660757.1_Cucumber_mosaic_virus_isolate_Anhui_segment_RNA2,cs	1
																																														KT310081.1_Cucumber_mosaic_virus_isolate_RPDJ_segment_RNA2,cs	1
																																														KC527801.1_Cucumber_mosaic_virus_isolate_RP28_segment_RNA1,cs	1
																																														LC066410.1_Cucumber_mosaic_virus_genomic_RNA,_segment:_3,cs,_isolate:_IWD041J	1
																																														AB124834.1_Cucumber_mosaic_virus_RNA_1_segment,cs	1
																																														KC527776.1_Cucumber_mosaic_virus_isolate_RP2_segment_RNA1,cs	1
																																														LT576867.1_Herpes_simplex_virus_(type_1_/_strain_17)_genome_assembly,_chromosome:_I	1
																																														LC066460.1_Cucumber_mosaic_virus_genomic_RNA,_segment:_2,cs,_isolate:_IRN-BRE5	1
																																														D10538.1_Cucumber_mosaic_virus_genomic_RNA,_segment_RNA_3,cs,_strain:_Fny	1
																																														LC066453.1_Cucumber_mosaic_virus_genomic_RNA,_segment:_1,cs,_isolate:_YMD068J	1
																																														HE971688.1_Cucumber_mosaic_virus_partial_CP_gene_for_coat_protein,_segment_RNA3,_genomic_RNA,_isolate_RJ2.1/09	1
																																														MG470800.1_Cucumber_mosaic_virus_isolate_R1_segment_RNA3_3a_protein_gene,_partial_cds;_and_coat_protein_gene,_complete_cds	1
																																														LT594109.1_Human_herpesvirus_1_isolate_270_2007_genome_assembly,cg:_monopartite	1
																																														HE971604.1_Cucumber_mosaic_virus_partial_CP_gene_for_coat_protein,_segment_RNA3,_genomic_RNA,_isolate_OSA1/09	1
																																														HE971613.1_Cucumber_mosaic_virus_partial_CP_gene_for_coat_protein,_segment_RNA3,_genomic_RNA,_isolate_AOU1.9/09	1
																																														HE971633.1_Cucumber_mosaic_virus_partial_CP_gene_for_coat_protein,_segment_RNA3,_genomic_RNA,_isolate_NU6/09	1
																																														LC066437.1_Cucumber_mosaic_virus_genomic_RNA,_segment:_3,cs,_isolate:_OD291J	1
																																														LT594112.1_Human_herpesvirus_1_isolate_369_2007_genome_assembly,cg:_monopartite	1
																																														LC066514.1_Cucumber_mosaic_virus_genomic_RNA,_segment:_2,cs,_isolate:_TUR86	1
																																														LC066469.1_Cucumber_mosaic_virus_genomic_RNA,_segment:_2,cs,_isolate:_IRN-REY6	1
																																														MG602507.1_UNVERIFIED:_Acanthamoeba_polyphaga_mimivirus,_partial_genome	1
																																														HE971519.1_Cucumber_mosaic_virus_partial_ORF2a_gene_and_ORF2b_gene,_segment_RNA2,_genomic_RNA,_isolate_NU7/09	1
																																														LC066400.1_Cucumber_mosaic_virus_genomic_RNA,_segment:_2,cs,_isolate:_AKD822J	1
																																														LC066463.1_Cucumber_mosaic_virus_genomic_RNA,_segment:_2,cs,_isolate:_IRN-Khs1	1
																																														HE971623.1_Cucumber_mosaic_virus_partial_CP_gene_for_coat_protein,_segment_RNA3,_genomic_RNA,_isolate_Z2.2/09	1
																																														KC527692.1_Cucumber_mosaic_virus_isolate_RP8_segment_RNA2,cs	1
																																														LC066518.1_Cucumber_mosaic_virus_genomic_RNA,_segment:_3,cs,_isolate:_TUR89	1
																																														AB079891.1_Cucumber_mosaic_virus_RNA3,cs,_strain:36a1	1
																																														KC527806.1_Cucumber_mosaic_virus_isolate_RP34_segment_RNA1,cs	1
																																														HE971690.1_Cucumber_mosaic_virus_partial_CP_gene_for_coat_protein,_segment_RNA3,_genomic_RNA,_isolate_B1.3/09	1
																																														LC066491.1_Cucumber_mosaic_virus_genomic_RNA,_segment:_3,cs,_isolate:_IRN-WRN15	1
																																														KC527817.1_Cucumber_mosaic_virus_isolate_RP48_segment_RNA1,cs	1
																																														HE971615.1_Cucumber_mosaic_virus_partial_CP_gene_for_coat_protein,_segment_RNA3,_genomic_RNA,_isolate_AOU2.3/09	1
																																														LC066474.1_Cucumber_mosaic_virus_genomic_RNA,_segment:_1,cs,_isolate:_IRN-SisSh64	1
																																														JN555585.1_Human_herpesvirus_1_strain_17,cg	1
																																														HQ916353.1_Cucumber_mosaic_virus_isolate_Gd_RNA-dependent_RNA_polymerase_(2a)_and_virus-induced_gene_silencing_supressor_(2b)_genes,_complete_cds	1
																																														KC527749.1_Cucumber_mosaic_virus_isolate_RP20_segment_RNA3,cs	1
																																														HE971635.1_Cucumber_mosaic_virus_partial_CP_gene_for_coat_protein,_segment_RNA3,_genomic_RNA,_isolate_NU8/09	1
																																														KC527800.1_Cucumber_mosaic_virus_isolate_RP27_segment_RNA1,cs	1
																																														NC_024310.1_Cynoglossus_semilaevis_isolate_Cse_v1.0_chromosome_4,_Cse_v1.0,wgss	1
																																														LC066413.1_Cucumber_mosaic_virus_genomic_RNA,_segment:_3,cs,_isolate:_KD302J	1
																																														KC527728.1_Cucumber_mosaic_virus_isolate_RP49_segment_RNA2,cs	1
																																														HE971609.1_Cucumber_mosaic_virus_partial_CP_gene_for_coat_protein,_segment_RNA3,_genomic_RNA,_isolate_OSA8/09	1
																																														EF213024.1_Cucumber_mosaic_virus_strain_CTL_segment_RNA2,cs	1
																																														AM183118.1_Cucumber_mosaic_virus_(strain_Ri-8)_genomic_RNA_segment_RNA2,_strain_Ri-8,cs	1
																																														KC527781.1_Cucumber_mosaic_virus_isolate_RP7_segment_RNA1,cs	1
[truncated: 2 more columns]

## Sheet: Summary1
File number	SARS-Cov-2 reads	Need to modify reads（AY274119.3）	Total	Fastv	Co-infection with other viruses
209001902R	27447	25	27472	Positive	Human_adenovirus
209001909R	8590	16	8606	Positive	—
209001904R	7258	12	7270	Positive	Human_adenovirus
209001889R	4876	9	4885	Positive	—
209001887R	3678	6	3684	Positive	—
209001908R	3079	—	3079	Positive	Human_adenovirus
209001903R	2616	8	2624	Positive	—
209001888R	1557	6	1563	Positive	—
209001897R	815	1	816	Positive	—
209001898R	544	—	544	Positive	—
209001905R	449	2	451	Positive	—
209001906R	442	—	442	Positive	—
209001893R	418	—	418	Positive	—
209001899R	96	—	96	Positive	—
209001895R	47	—	47	Positive	—
209001910R	38	—	38	Positive	Human_adenovirus
209001890R	8	—	8	Negative	—
209001901R	6	—	6	Negative	—
209001892R	5	—	5	Negative	—
209001894R	3	—	3	Negative	Human_respiratory_syncytial_virus_B																																											KC019300.1_Cucumber_mosaic_virus_segment_RNA2,cs	79
209001896R	3	—	3	Negative	—																																											HE971670.1_Cucumber_mosaic_virus_partial_CP_gene_for_coat_protein,_segment_RNA3,_genomic_RNA,_isolate_DHH1.1/09	78
209001900R	2	—	2	Negative	—																																											HQ283391.1_Cucumber_mosaic_virus_isolate_SFQT1-2_segment_RNA2,cs	78
209001891R	1	—	1	Negative	—																																											AM183114.1_Cucumber_mosaic_virus_(strain_Pl-1)_genomic_RNA_segment_RNA1,_strain_Pl-1,cs	77
209001912R	1	—	1	Negative	—																																											KC527755.1_Cucumber_mosaic_virus_isolate_RP27_segment_RNA3,cs	72
209001907R	0	—	0	Negative	—																																											DQ412731.1_Cucumber_mosaic_virus_isolate_Phy_segment_RNA2,cs	71
209001911R	0	—	0	Negative	—																																											MG182149.1_Cucumber_mosaic_virus_strain_K_2016_segment_RNA2,cs	63
																																																EU723568.1_Cucumber_mosaic_virus_strain_PHz_segment_RNA1,cs	61
																																																U20220.1_Cucumber_mosaic_virus_1a_protein_gene,_complete_cds	61
																																																BK000407.1_TPA:_Human_adenovirus_type_2,cg	56
																																																FJ268746.1_Cucumber_mosaic_virus_isolate_Cah1_segment_RNA3,cs	54
																																																KC527734.1_Cucumber_mosaic_virus_isolate_RP5_segment_RNA3,cs	54
																																																KC527795.1_Cucumber_mosaic_virus_isolate_RP22_segment_RNA1,cs	50
																																																JN054635.1_Cucumber_mosaic_virus_strain_CLW2_movement_protein_and_coat_protein_genes,_complete_cds	49
																																																HE962480.1_Cucumber_mosaic_virus_RNA3_complete_segment,_genomic_RNA,_strain_Vir	48
																																																AJ276481.1_Cucumber_mosaic_virus_(strain_Mf),_complete_RNA3_segment	47
																																																LC066470.1_Cucumber_mosaic_virus_genomic_RNA,_segment:_3,cs,_isolate:_IRN-REY6	46
																																																EF213025.1_Cucumber_mosaic_virus_strain_CTL_segment_RNA3,cs	45
																																																HE971694.1_Cucumber_mosaic_virus_partial_CP_gene_for_coat_protein,_segment_RNA3,_genomic_RNA,_isolate_B2.2/09	45
																																																KC527794.1_Cucumber_mosaic_virus_isolate_RP20_segment_RNA1,cs	45
																																																KP033524.1_Cucumber_mosaic_virus_isolate_GTN_segment_RNA1,cs	45
																																																HE971671.1_Cucumber_mosaic_virus_partial_CP_gene_for_coat_protein,_segment_RNA3,_genomic_RNA,_isolate_DHH1.2/09	43
																																																AJ580953.1_Cucumber_mosaic_virus_1a_gene,_genomic_RNA,_strain_Ns	43
																																																KC527707.1_Cucumber_mosaic_virus_isolate_RP24_segment_RNA2,cs	43
																																																LC066435.1_Cucumber_mosaic_virus_genomic_RNA,_segment:_1,cs,_isolate:_OD291J	42
																																																KC527733.1_Cucumber_mosaic_virus_isolate_RP4_segment_RNA3,cs	41
																																																MG182148.1_Cucumber_mosaic_virus_strain_K_2016_segment_RNA1,cs	40
																																																KT004542.1_Cucumber_mosaic_virus_strain_WN1_segment_RNA1,cs	39
																																																HQ283393.1_Cucumber_mosaic_virus_isolate_SFQT1-2_segment_RNA3,cs	38
																																																KJ400002.1_Cucumber_mosaic_virus_isolate_209_segment_RNA1,cs	37
																																																LC066464.1_Cucumber_mosaic_virus_genomic_RNA,_segment:_3,cs,_isolate:_IRN-Khs1	36
																																																KC527710.1_Cucumber_mosaic_virus_isolate_RP27_segment_RNA2,cs	35
																																																LC066473.1_Cucumber_mosaic_virus_genomic_RNA,_segment:_3,cs,_isolate:_IRN-REY10	34
																																																KY794709.1_Cucumber_mosaic_virus_isolate_Met_segment_RNA2,cs	34
																																																FJ947080.1_Human_papillomavirus_type_115_isolate_GC02,cg	33
																																																KC527768.1_Cucumber_mosaic_virus_isolate_RP44_segment_RNA3,cs	33
																																																LC066407.1_Cucumber_mosaic_virus_genomic_RNA,_segment:_3,cs,_isolate:_GFD560J	33
																																																KC527700.1_Cucumber_mosaic_virus_isolate_RP16_segment_RNA2,cs	33
																																																KC693009.1_Cucumber_mosaic_virus_isolate_ZMBJ_segment_RNA3,cs	32
																																																LC066414.1_Cucumber_mosaic_virus_genomic_RNA,_segment:_1,cs,_isolate:_MD965J	32
																																																LC066476.1_Cucumber_mosaic_virus_genomic_RNA,_segment:_3,cs,_isolate:_IRN-SisSh64	31
																																																KC527735.1_Cucumber_mosaic_virus_isolate_RP6_segment_RNA3,cs	31
																																																HE962479.1_Cucumber_mosaic_virus_RNA2_complete_segment,_genomic_RNA,_strain_Vir	31
																																																J01917.1_Adenovirus_type_2,cg	29
																																																MG182150.1_Cucumber_mosaic_virus_strain_K_2016_segment_RNA3,cs	27
																																																HE971660.1_Cucumber_mosaic_virus_partial_CP_gene_for_coat_protein,_segment_RNA3,_genomic_RNA,_isolate_BC3.3/09	26
																																																KC527785.1_Cucumber_mosaic_virus_isolate_RP11_segment_RNA1,cs	25
																																																D16405.1_Cucumber_mosaic_virus_genes_for_movement_protein_and_viral_coat_protein,_complete_cds	24
																																																LC066506.1_Cucumber_mosaic_virus_genomic_RNA,_segment:_3,cs,_isolate:_TUR81	24
																																																KX660756.1_Cucumber_mosaic_virus_isolate_Anhui_segment_RNA1,cs	23
																																																KC527786.1_Cucumber_mosaic_virus_isolate_RP12_segment_RNA1,cs	23
																																																KC527718.1_Cucumber_mosaic_virus_isolate_RP38_segment_RNA2,cs	23
																																																KM272278.1_Cucumber_mosaic_virus_strain_KO_segment_RNA2,cs	21
																																																KC527762.1_Cucumber_mosaic_virus_isolate_RP35_segment_RNA3,cs	21
																																																KC527721.1_Cucumber_mosaic_virus_isolate_RP41_segment_RNA2,cs	21
																																																AM183116.1_Cucumber_mosaic_virus_(strain_Pl-1)_genomic_RNA_segment_RNA3,_strain_Pl-1,cs	21
																																																FJ268744.1_Cucumber_mosaic_virus_isolate_Cah1_segment_RNA1,cs	21
																																																KC527787.1_Cucumber_mosaic_virus_isolate_RP13_segment_RNA1,cs	20
																																																HF572914.1_Cucumber_mosaic_virus_segment_RNA1,_genomic_RNA,_isolate_Bn57	19
																																																KC527697.1_Cucumber_mosaic_virus_isolate_RP13_segment_RNA2,cs	19
																																																LC363917.1_Cucumber_mosaic_virus_Co-46_genomic_RNA,_segment:_RNA1,cs	19
																																																NC_024327.1_Cynoglossus_semilaevis_isolate_Cse_v1.0_chromosome_W,_Cse_v1.0,wgss	19
																																																HE962478.1_Cucumber_mosaic_virus_RNA1_complete_segment,_genomic_RNA,_strain_Vir	19
																																																LC066411.1_Cucumber_mosaic_virus_genomic_RNA,_segment:_1,cs,_isolate:_KD302J	18
																																																KT004544.1_Cucumber_mosaic_virus_strain_WN1_segment_RNA3,cs	18
																																																KC527719.1_Cucumber_mosaic_virus_isolate_RP39_segment_RNA2,cs	18
																																																KT350981.1_Cucumber_mosaic_virus_isolate_ZMBJ_segment_RNA2,cs	17
																																																KC527747.1_Cucumber_mosaic_virus_isolate_RP18_segment_RNA3,cs	17
																																																LC066426.1_Cucumber_mosaic_virus_genomic_RNA,_segment:_1,cs,_isolate:_NID045J	16
																																																AB124835.1_Cucumber_mosaic_virus_RNA_2_segment,cs	16
																																																JN054637.1_Cucumber_mosaic_virus_strain_CLW2_RNA-dependent_RNA_polymerase_and_2b_protein_genes,_complete_cds	16
																																																LC066486.1_Cucumber_mosaic_virus_genomic_RNA,_segment:_1,cs,_isolate:_IRN-WRN9	16
																																																AM183115.1_Cucumber_mosaic_virus_(strain_Pl-1)_genomic_RNA_segment_RNA2,_strain_Pl-1,cs	16
																																																KC527743.1_Cucumber_mosaic_virus_isolate_RP14_segment_RNA3,cs	15
																																																LC066427.1_Cucumber_mosaic_virus_genomic_RNA,_segment:_2,cs,_isolate:_NID045J	15
																																																LC363918.1_Cucumber_mosaic_virus_Co-46_genomic_RNA,_segment:_RNA2,cs	15
																																																KT310082.1_Cucumber_mosaic_virus_isolate_RPDJ_segment_RNA3,cs	15
																																																LC066516.1_Cucumber_mosaic_virus_genomic_RNA,_segment:_1,cs,_isolate:_TUR89	14
																																																KC527694.1_Cucumber_mosaic_virus_isolate_RP10_segment_RNA2,cs	13
																																																KU255787.1_Cucumber_mosaic_virus_strain_DS_segment_RNA1,cs	13
																																																D28779.1_Cucumber_mosaic_virus_genes_for_2a,_2b,_complete_cds,_segment_2	13
																																																KC527741.1_Cucumber_mosaic_virus_isolate_RP12_segment_RNA3,cs	13
																																																AB506797.1_Cucumber_mosaic_virus_RNA_3,cs,_strain:_Li	13
																																																KC527760.1_Cucumber_mosaic_virus_isolate_RP33_segment_RNA3,cs	13
																																																LC066448.1_Cucumber_mosaic_virus_genomic_RNA,_segment:_2,cs,_isolate:_TRT611J	13
																																																KC527685.1_Cucumber_mosaic_virus_isolate_RP1_segment_RNA2,cs	13
																																																KU255788.1_Cucumber_mosaic_virus_strain_DS_segment_RNA2,cs	13
																																																MF588679.1_Betapapillomavirus_1_isolate_Beta01_w15c111,cg	13
																																																KC527746.1_Cucumber_mosaic_virus_isolate_RP17_segment_RNA3,cs	13
																																																DQ279927.1_Human_herpesvirus_4_strain_AG876,cg	12
																																																KC527767.1_Cucumber_mosaic_virus_isolate_RP42_segment_RNA3,cs	12
																																																KU255790.1_Cucumber_mosaic_virus_strain_DA_segment_RNA1,cs	12
																																																KU255792.1_Cucumber_mosaic_virus_strain_DA_segment_RNA3,cs	12
																																																KC527759.1_Cucumber_mosaic_virus_isolate_RP31_segment_RNA3,cs	12
																																																KC527730.1_Cucumber_mosaic_virus_isolate_RP1_segment_RNA3,cs	11
																																																KP033526.1_Cucumber_mosaic_virus_isolate_GTN_segment_RNA3,cs	11
																																																LC066417.1_Cucumber_mosaic_virus_genomic_RNA,_segment:_1,cs,_isolate:_MED303J	11
																																																AJ507799.2_Human_herpesvirus_4_complete_wild_type_genome	11
																																																LC339511.1_Cucumber_mosaic_virus_Ma-1_genomic_RNA,_segment:_RNA3,cs	11
																																																KC527695.1_Cucumber_mosaic_virus_isolate_RP11_segment_RNA2,cs	11
																																																LC066489.1_Cucumber_mosaic_virus_genomic_RNA,_segment:_1,cs,_isolate:_IRN-WRN15	11
																																																D28780.1_Cucumber_mosaic_virus_genes_for_3a,_coat_protein,_complete_cds,_segment_3	11
																																																FJ268745.1_Cucumber_mosaic_virus_isolate_Cah1_segment_RNA2,cs	11
																																																KC527748.1_Cucumber_mosaic_virus_isolate_RP19_segment_RNA3,cs	10
																																																LC066467.1_Cucumber_mosaic_virus_genomic_RNA,_segment:_3,cs,_isolate:_IRN-REY4	10
																																																AY429435.1_Cucumber_mosaic_virus_segment_RNA1,cs	10
																																																LC066513.1_Cucumber_mosaic_virus_genomic_RNA,_segment:_1,cs,_isolate:_TUR86	10
																																																JX014246.1_Cucumber_mosaic_virus_isolate_Va_segment_RNA1,cs	10
																																																LC066450.1_Cucumber_mosaic_virus_genomic_RNA,_segment:_1,cs,_isolate:_TYD083J	10
																																																LT594107.1_Human_herpesvirus_1_isolate_3083_2008_genome_assembly,cg:_monopartite	9
																																																KC527761.1_Cucumber_mosaic_virus_isolate_RP34_segment_RNA3,cs	9
																																																KJ400003.1_Cucumber_mosaic_virus_isolate_209_segment_RNA2,cs	9
																																																BK000408.1_TPA:_Human_adenovirus_type_5,cg	9
																																																KC527818.1_Cucumber_mosaic_virus_isolate_RP49_segment_RNA1,cs	9
																																																AB506800.1_Cucumber_mosaic_virus_RNA_3,cs,_strain:_LiCB	9
																																																KC019299.1_Cucumber_mosaic_virus_segment_RNA1,cs	9
																																																LC066510.1_Cucumber_mosaic_virus_genomic_RNA,_segment:_1,cs,_isolate:_TUR84	9
																																																KC527752.1_Cucumber_mosaic_virus_isolate_RP24_segment_RNA3,cs	9
																																																KC527745.1_Cucumber_mosaic_virus_isolate_RP16_segment_RNA3,cs	9
																																																MG025947.1_Cucumber_mosaic_virus_isolate_Rs_segment_RNA_1,cs	9
																																																HQ874434.1_Cucumber_mosaic_virus_isolate_Gd_1a_protein_(1a)_gene,_complete_cds	8
																																																BK005234.1_TPA:_Human_adenovirus_type_1,cg	8
																																																LC066408.1_Cucumber_mosaic_virus_genomic_RNA,_segment:_1,cs,_isolate:_IWD041J	8
																																																KC527742.1_Cucumber_mosaic_virus_isolate_RP13_segment_RNA3,cs	8
																																																KC527766.1_Cucumber_mosaic_virus_isolate_RP41_segment_RNA3,cs	8
																																																KU947029.1_Cucumber_mosaic_virus_segment_RNA1,cs	8
																																																KC527744.1_Cucumber_mosaic_virus_isolate_RP15_segment_RNA3,cs	7
																																																KC527753.1_Cucumber_mosaic_virus_isolate_RP25_segment_RNA3,cs	7
																																																JN180309.1_Cucumber_mosaic_virus_segment_RNA1,cs	7
																																																KC527686.1_Cucumber_mosaic_virus_isolate_RP2_segment_RNA2,cs	7
																																																LT594106.1_Human_herpesvirus_1_isolate_2158_2007_genome_assembly,cg:_monopartite	7
																																																EF213023.1_Cucumber_mosaic_virus_strain_CTL_segment_RNA1,cs	7
																																																LT594111.1_Human_herpesvirus_1_isolate_1394_2005_genome_assembly,cg:_monopartite	7
																																																KC527789.1_Cucumber_mosaic_virus_isolate_RP15_segment_RNA1,cs	7
																																																KC527750.1_Cucumber_mosaic_virus_isolate_RP22_segment_RNA3,cs	7
																																																KY040274.1_Molluscum_contagiosum_virus_subtype_2_isolate_Madrid_2016_1,cg	7
																																																LC066441.1_Cucumber_mosaic_virus_genomic_RNA,_segment:_1,cs,_isolate:_OGI12J3	6
																																																AY429436.1_Cucumber_mosaic_virus_segment_RNA2,cs	6
																																																KC527763.1_Cucumber_mosaic_virus_isolate_RP38_segment_RNA3,cs	6
																																																KC527772.1_Cucumber_mosaic_virus_isolate_RP48_segment_RNA3,cs	6
																																																HE971600.1_Cucumber_mosaic_virus_partial_CP_gene_for_coat_protein,_segment_RNA3,_genomic_RNA,_isolate_DH1.8/08	6
																																																X56147.1_Human_papillomavirus_type_41	6
																																																KC527812.1_Cucumber_mosaic_virus_isolate_RP42_segment_RNA1,cs	6
																																																KC527739.1_Cucumber_mosaic_virus_isolate_RP10_segment_RNA3,cs	6
																																																KC527799.1_Cucumber_mosaic_virus_isolate_RP26_segment_RNA1,cs	6
																																																FM955842.1_Human_papillomavirus_type_113,cg	6
																																																LC066487.1_Cucumber_mosaic_virus_genomic_RNA,_segment:_2,cs,_isolate:_IRN-WRN9	6
																																																LC066477.1_Cucumber_mosaic_virus_genomic_RNA,_segment:_1,cs,_isolate:_IRN-TIm1	6
																																																KC527738.1_Cucumber_mosaic_virus_isolate_RP9_segment_RNA3,cs	6
																																																LC066490.1_Cucumber_mosaic_virus_genomic_RNA,_segment:_2,cs,_isolate:_IRN-WRN15	5
																																																KC527757.1_Cucumber_mosaic_virus_isolate_RP29_segment_RNA3,cs	5
																																																KU947031.1_Cucumber_mosaic_virus_segment_RNA3,cs	5
																																																KC527807.1_Cucumber_mosaic_virus_isolate_RP35_segment_RNA1,cs	5
																																																LC066511.1_Cucumber_mosaic_virus_genomic_RNA,_segment:_2,cs,_isolate:_TUR84	5
																																																LC066423.1_Cucumber_mosaic_virus_genomic_RNA,_segment:_1,cs,_isolate:_ND278J	5
																																																LT576869.1_Herpes_simplex_virus_(type_1_/_strain_17)_genome_assembly,_chromosome:_I	5
																																																HE971632.1_Cucumber_mosaic_virus_partial_CP_gene_for_coat_protein,_segment_RNA3,_genomic_RNA,_isolate_NU5/09	5
																																																NC_030848.1_Haloarcula_californiae_icosahedral_virus_1,cg	5
																																																KC527699.1_Cucumber_mosaic_virus_isolate_RP15_segment_RNA2,cs	5
																																																Y15173.1_Human_papillomavirus_type_75_E6,_E7,_E1,_E2,_E4,_L2,_and_L1_genes	5
																																																HE971612.1_Cucumber_mosaic_virus_partial_CP_gene_for_coat_protein,_segment_RNA3,_genomic_RNA,_isolate_AOU1.8/09	5
																																																KC527790.1_Cucumber_mosaic_virus_isolate_RP16_segment_RNA1,cs	5
																																																LC066461.1_Cucumber_mosaic_virus_genomic_RNA,_segment:_3,cs,_isolate:_IRN-BRE5	5
																																																KC527764.1_Cucumber_mosaic_virus_isolate_RP39_segment_RNA3,cs	5
																																																LC066438.1_Cucumber_mosaic_virus_genomic_RNA,_segment:_1,cs,_isolate:_OGI11X2	5
																																																KC527796.1_Cucumber_mosaic_virus_isolate_RP23_segment_RNA1,cs	5
																																																AY429437.1_Cucumber_mosaic_virus_segment_RNA3,cs	5
																																																KC527693.1_Cucumber_mosaic_virus_isolate_RP9_segment_RNA2,cs	5
																																																AB368496.1_Cucumber_mosaic_virus_genomic_RNA,_segment_RNA1,cs,_isolate:_42CM	5
																																																KC527703.1_Cucumber_mosaic_virus_isolate_RP19_segment_RNA2,cs	5
																																																LC066507.1_Cucumber_mosaic_virus_genomic_RNA,_segment:_1,cs,_isolate:_TUR83	5
																																																KC527723.1_Cucumber_mosaic_virus_isolate_RP44_segment_RNA2,cs	5
																																																KC527740.1_Cucumber_mosaic_virus_isolate_RP11_segment_RNA3,cs	4
																																																KT004543.1_Cucumber_mosaic_virus_strain_WN1_segment_RNA2,cs	4
																																																LC066405.1_Cucumber_mosaic_virus_genomic_RNA,_segment:_1,cs,_isolate:_GFD560J	4
																																																KC527808.1_Cucumber_mosaic_virus_isolate_RP38_segment_RNA1,cs	4
																																																KC527816.1_Cucumber_mosaic_virus_isolate_RP47_segment_RNA1,cs	4
																																																JN180310.1_Cucumber_mosaic_virus_segment_RNA2,cs	4
																																																LC066429.1_Cucumber_mosaic_virus_genomic_RNA,_segment:_1,cs,_isolate:_NND454J	4
																																																NC_001354.1_Human_papillomavirus_type_41,cg	4
																																																KC527784.1_Cucumber_mosaic_virus_isolate_RP10_segment_RNA1,cs	4
																																																KC527736.1_Cucumber_mosaic_virus_isolate_RP7_segment_RNA3,cs	4
																																																KC527805.1_Cucumber_mosaic_virus_isolate_RP33_segment_RNA1,cs	4
																																																KC527737.1_Cucumber_mosaic_virus_isolate_RP8_segment_RNA3,cs	4
																																																HQ413315.1_Human_adenovirus_6_isolate_Tonsil_99,cg	4
																																																M81413.1_Pepper_mild_mottle_virus_strain_S_genomic_sequence	4
																																																HE971606.1_Cucumber_mosaic_virus_partial_CP_gene_for_coat_protein,_segment_RNA3,_genomic_RNA,_isolate_OSA3/09	4
																																																AB188234.1_Cucumber_mosaic_virus_RNA1_segment,cs,_isolate:CM95	4
																																																KC527797.1_Cucumber_mosaic_virus_isolate_RP24_segment_RNA1,cs	4
																																																DQ399550.1_Cucumber_mosaic_virus_strain_BX_segment_RNA3,cs	4
																																																HE971627.1_Cucumber_mosaic_virus_partial_CP_gene_for_coat_protein,_segment_RNA3,_genomic_RNA,_isolate_Z2.8/09	4
																																																KU255789.1_Cucumber_mosaic_virus_strain_DS_segment_RNA3,cs	4
																																																NC_024328.1_Cynoglossus_semilaevis_isolate_Cse_v1.0_chromosome_Z,_Cse_v1.0,wgss	4
																																																KP165580.1_Cucumber_mosaic_virus_isolate_PV0187_segment_RNA1_1a_protein_gene,_complete_cds	4
																																																KC527791.1_Cucumber_mosaic_virus_isolate_RP17_segment_RNA1,cs	4
																																																MF588678.1_Betapapillomavirus_1_isolate_Beta01_m292c10,cg	4
																																																EF202596.1_Cucumber_mosaic_virus_isolate_Tsh_segment_RNA2,cs	4
																																																AB188228.1_Cucumber_mosaic_virus_RNA1_segment,cs,_isolate:Mi	4
																																																KT310080.1_Cucumber_mosaic_virus_isolate_RPDJ_segment_RNA1,cs	4
																																																KM272277.1_Cucumber_mosaic_virus_strain_KO_segment_RNA1,cs	4
																																																KC527819.1_Cucumber_mosaic_virus_isolate_RP50_segment_RNA1,cs	4
																																																AB079889.1_Cucumber_mosaic_virus_RNA1,cs,_strain:36a1	4
																																																HE971687.1_Cucumber_mosaic_virus_partial_CP_gene_for_coat_protein,_segment_RNA3,_genomic_RNA,_isolate_RJ1.1/09	4
																																																KC527765.1_Cucumber_mosaic_virus_isolate_RP40_segment_RNA3,cs	4
																																																JN054636.1_Cucumber_mosaic_virus_strain_CLW2_putative_RNA_helicase_and_methyltransferase_gene,_complete_cds	3
																																																KC527722.1_Cucumber_mosaic_virus_isolate_RP42_segment_RNA2,cs	3
																																																LT594457.1_Human_herpesvirus_1_isolate_132_1998_genome_assembly,cg:_monopartite	3
																																																KC527804.1_Cucumber_mosaic_virus_isolate_RP31_segment_RNA1,cs	3
																																																KC527709.1_Cucumber_mosaic_virus_isolate_RP26_segment_RNA2,cs	3
																																																KC527688.1_Cucumber_mosaic_virus_isolate_RP4_segment_RNA2,cs	3
																																																HE971503.1_Cucumber_mosaic_virus_partial_ORF2a_gene_and_ORF2b_gene,_segment_RNA2,_genomic_RNA,_isolate_Z1.2/09	3
																																																KY886411.1_Cucumber_mosaic_virus_isolate_CMV-SP_segment_RNA3,cs	3
																																																LT576868.1_Herpes_simplex_virus_(type_1_/_strain_17)_genome_assembly,_chromosome:_I	3
																																																LC066402.1_Cucumber_mosaic_virus_genomic_RNA,_segment:_1,cs,_isolate:_EHD732J	3
																																																AB506799.1_Cucumber_mosaic_virus_RNA_2,cs,_strain:_LiCB	3
																																																KC527774.1_Cucumber_mosaic_virus_isolate_RP50_segment_RNA3,cs	3
																																																HE971626.1_Cucumber_mosaic_virus_partial_CP_gene_for_coat_protein,_segment_RNA3,_genomic_RNA,_isolate_Z2.6/09	3
																																																LT576871.1_Herpes_simplex_virus_(type_1_/_strain_17)_isolate_5B_genome_assembly,_chromosome:_I	3
																																																KC527813.1_Cucumber_mosaic_virus_isolate_RP44_segment_RNA1,cs	3
																																																KC527783.1_Cucumber_mosaic_virus_isolate_RP9_segment_RNA1,cs	3
																																																KC527717.1_Cucumber_mosaic_virus_isolate_RP35_segment_RNA2,cs	3
																																																LT576870.1_Herpes_simplex_virus_(type_1_/_strain_17)_genome_assembly,_chromosome:_I	3
																																																HE971668.1_Cucumber_mosaic_virus_partial_CP_gene_for_coat_protein,_segment_RNA3,_genomic_RNA,_isolate_T1.4/09	3
																																																LC066498.1_Cucumber_mosaic_virus_genomic_RNA,_segment:_1,cs,_isolate:_TUR4	3
																																																LC066454.1_Cucumber_mosaic_virus_genomic_RNA,_segment:_2,cs,_isolate:_YMD068J	3
																																																LC066424.1_Cucumber_mosaic_virus_genomic_RNA,_segment:_2,cs,_isolate:_ND278J	3
																																																HE971636.1_Cucumber_mosaic_virus_partial_CP_gene_for_coat_protein,_segment_RNA3,_genomic_RNA,_isolate_NU10/09	3
																																																HE971619.1_Cucumber_mosaic_virus_partial_CP_gene_for_coat_protein,_segment_RNA3,_genomic_RNA,_isolate_Z1.2/09	3
																																																HE971618.1_Cucumber_mosaic_virus_partial_CP_gene_for_coat_protein,_segment_RNA3,_genomic_RNA,_isolate_AOU2.9/09	3
																																																KC527724.1_Cucumber_mosaic_virus_isolate_RP45_segment_RNA2,cs	3
																																																KC527715.1_Cucumber_mosaic_virus_isolate_RP33_segment_RNA2,cs	3
																																																LC066401.1_Cucumber_mosaic_virus_genomic_RNA,_segment:_3,cs,_isolate:_AKD822J	3
																																																KC527798.1_Cucumber_mosaic_virus_isolate_RP25_segment_RNA1,cs	3
																																																LC066444.1_Cucumber_mosaic_virus_genomic_RNA,_segment:_1,cs,_isolate:_TKD766J	3
																																																LT608134.1_Herpes_simplex_virus_(type_1_/_strain_17)_genome_assembly,_chromosome:_I	3
																																																NC_024308.1_Cynoglossus_semilaevis_isolate_Cse_v1.0_chromosome_2,_Cse_v1.0,wgss	3
																																																KC527731.1_Cucumber_mosaic_virus_isolate_RP2_segment_RNA3,cs	3
																																																EU414796.1_Cucumber_mosaic_virus_isolate_CMV-RZ_1a_protein_(1a)_gene,_partial_cds	3
																																																KC527811.1_Cucumber_mosaic_virus_isolate_RP41_segment_RNA1,cs	3
																																																KC527701.1_Cucumber_mosaic_virus_isolate_RP17_segment_RNA2,cs	3
																																																KC527727.1_Cucumber_mosaic_virus_isolate_RP48_segment_RNA2,cs	3
																																																KC527732.1_Cucumber_mosaic_virus_isolate_RP3_segment_RNA3,cs	3
																																																KC527814.1_Cucumber_mosaic_virus_isolate_RP45_segment_RNA1,cs	3
																																																LT594108.1_Human_herpesvirus_1_isolate_1319_2005_genome_assembly,cg:_monopartite	3
																																																HE971624.1_Cucumber_mosaic_virus_partial_CP_gene_for_coat_protein,_segment_RNA3,_genomic_RNA,_isolate_Z2.3/09	2
																																																D00356.1_Cucumber_mosaic_virus_segment_RNA_1,_5'end_of_virion,_strain:_Fny	2
																																																MG470799.1_Cucumber_mosaic_virus_isolate_R1_segment_RNA2_RNA-dependent_RNA_polymerase_and_2b_protein_genes,_complete_cds	2
																																																KC527702.1_Cucumber_mosaic_virus_isolate_RP18_segment_RNA2,cs	2
																																																KC527698.1_Cucumber_mosaic_virus_isolate_RP14_segment_RNA2,cs	2
																																																LC066495.1_Cucumber_mosaic_virus_genomic_RNA,_segment:_1,cs,_isolate:_IRN-WRWA5	2
																																																LC066456.1_Cucumber_mosaic_virus_genomic_RNA,_segment:_1,cs,_isolate:_YMD069J	2
																																																LC066409.1_Cucumber_mosaic_virus_genomic_RNA,_segment:_2,cs,_isolate:_IWD041J	2
																																																EU414801.1_Cucumber_mosaic_virus_isolate_CMV-RZ_segment_RNA2_2a_protein_(2a)_and_2b_protein_(2b)_genes,_complete_cds	2
																																																EU414795.1_Cucumber_mosaic_virus_isolate_CMV-QZ_1a_protein_(1a)_gene,_complete_cds	2
																																																KC527810.1_Cucumber_mosaic_virus_isolate_RP40_segment_RNA1,cs	2
																																																MG602508.1_UNVERIFIED:_Acanthamoeba_polyphaga_mimivirus,_partial_genome	2
																																																AJ511989.1_Cucumber_mosaic_virus_2a_gene_for_RNA_dependent_RNA_polymerase_and_2b_gene_for_VIGS_supressor,_genomic_RNA	2
																																																KC527780.1_Cucumber_mosaic_virus_isolate_RP6_segment_RNA1,cs	2
																																																KC527769.1_Cucumber_mosaic_virus_isolate_RP45_segment_RNA3,cs	2
																																																HE971622.1_Cucumber_mosaic_virus_partial_CP_gene_for_coat_protein,_segment_RNA3,_genomic_RNA,_isolate_Z1.6/09	2
																																																LC066517.1_Cucumber_mosaic_virus_genomic_RNA,_segment:_2,cs,_isolate:_TUR89	2
																																																KC527714.1_Cucumber_mosaic_virus_isolate_RP31_segment_RNA2,cs	2
																																																KC527779.1_Cucumber_mosaic_virus_isolate_RP5_segment_RNA1,cs	2
																																																KC527802.1_Cucumber_mosaic_virus_isolate_RP29_segment_RNA1,cs	2
																																																KC527687.1_Cucumber_mosaic_virus_isolate_RP3_segment_RNA2,cs	2
																																																LC066501.1_Cucumber_mosaic_virus_genomic_RNA,_segment:_1,cs,_isolate:_TUR54	2
																																																KC527720.1_Cucumber_mosaic_virus_isolate_RP40_segment_RNA2,cs	2
																																																HE971616.1_Cucumber_mosaic_virus_partial_CP_gene_for_coat_protein,_segment_RNA3,_genomic_RNA,_isolate_AOU2.4/09	2
																																																KC527712.1_Cucumber_mosaic_virus_isolate_RP29_segment_RNA2,cs	2
																																																HE971620.1_Cucumber_mosaic_virus_partial_CP_gene_for_coat_protein,_segment_RNA3,_genomic_RNA,_isolate_Z1.4/09	2
																																																HE971631.1_Cucumber_mosaic_virus_partial_CP_gene_for_coat_protein,_segment_RNA3,_genomic_RNA,_isolate_NU3/09	2
																																																KC527729.1_Cucumber_mosaic_virus_isolate_RP50_segment_RNA2,cs	2
																																																LT594110.1_Human_herpesvirus_1_isolate_66_2007_genome_assembly,cg:_monopartite	2
																																																MG470798.1_Cucumber_mosaic_virus_isolate_R1_segment_RNA1_ORF1_gene,_complete_cds	2
																																																AB368500.1_Cucumber_mosaic_virus_isolate_PF_segment_RNA2,cs	2
																																																KC527782.1_Cucumber_mosaic_virus_isolate_RP8_segment_RNA1,cs	2
																																																LC066505.1_Cucumber_mosaic_virus_genomic_RNA,_segment:_2,cs,_isolate:_TUR81	2
																																																LC066480.1_Cucumber_mosaic_virus_genomic_RNA,_segment:_1,cs,_isolate:_IRN-TVRa26	2
																																																HE971669.1_Cucumber_mosaic_virus_partial_CP_gene_for_coat_protein,_segment_RNA3,_genomic_RNA,_isolate_T1.8/09	2
																																																LC066508.1_Cucumber_mosaic_virus_genomic_RNA,_segment:_2,cs,_isolate:_TUR83	2
																																																AB920561.1_Cucumber_mosaic_virus_genomic_RNA,_segment_RNA1,cs,_strain:_m1	2
																																																KC527770.1_Cucumber_mosaic_virus_isolate_RP46_segment_RNA3,cs	2
																																																KC527773.1_Cucumber_mosaic_virus_isolate_RP49_segment_RNA3,cs	2
																																																KP165582.1_Cucumber_mosaic_virus_isolate_PV0187_segment_RNA3_3a_protein_and_3b_protein_genes,_complete_cds	2
																																																KR535605.1_Cucumber_mosaic_virus_isolate_CMV-KoPF_segment_RNA1,cs	2
																																																HE971476.1_Cucumber_mosaic_virus_partial_ORF2a_gene_and_ORF2b_gene,_segment_RNA2,_genomic_RNA,_isolate_DH1.8/08	2
																																																KC527788.1_Cucumber_mosaic_virus_isolate_RP14_segment_RNA1,cs	1
																																																HE971440.1_Cucumber_mosaic_virus_partial_ORF1a_gene_for_helicase,_segment_RNA1,_genomic_RNA,_isolate_DHH3.8/09	1
																																																KC527756.1_Cucumber_mosaic_virus_isolate_RP28_segment_RNA3,cs	1
																																																LC066472.1_Cucumber_mosaic_virus_genomic_RNA,_segment:_2,cs,_isolate:_IRN-REY10	1
																																																KC527803.1_Cucumber_mosaic_virus_isolate_RP30_segment_RNA1,cs	1
																																																LC066499.1_Cucumber_mosaic_virus_genomic_RNA,_segment:_2,cs,_isolate:_TUR4	1
																																																LC066471.1_Cucumber_mosaic_virus_genomic_RNA,_segment:_1,cs,_isolate:_IRN-REY10	1
																																																AB506795.1_Cucumber_mosaic_virus_RNA_1,cs,_strain:_Li	1
																																																HE971634.1_Cucumber_mosaic_virus_partial_CP_gene_for_coat_protein,_segment_RNA3,_genomic_RNA,_isolate_NU7/09	1
																																																AM183119.1_Cucumber_mosaic_virus_(strain_Ri-8)_genomic_RNA_segment_RNA3,_strain_Ri-8,cs	1
																																																LT594105.1_Human_herpesvirus_1_isolate_172_2010_genome_assembly,cg:_monopartite	1
																																																GU327366.1_Cucumber_mosaic_virus_strain_Z1_segment_RNA-1,cs	1
																																																LC066466.1_Cucumber_mosaic_virus_genomic_RNA,_segment:_2,cs,_isolate:_IRN-REY4	1
																																																KC527691.1_Cucumber_mosaic_virus_isolate_RP7_segment_RNA2,cs	1
																																																HE971702.1_Cucumber_mosaic_virus_partial_CP_gene_for_coat_protein,_segment_RNA3,_genomic_RNA,_isolate_UK73/96	1
																																																AB188233.1_Cucumber_mosaic_virus_RNA3_segment,cs,_isolate:Fuka4-4	1
																																																GU327363.1_Cucumber_mosaic_virus_strain_Rb_segment_RNA-1,cs	1
																																																LC066504.1_Cucumber_mosaic_virus_genomic_RNA,_segment:_1,cs,_isolate:_TUR81	1
																																																LC066457.1_Cucumber_mosaic_virus_genomic_RNA,_segment:_2,cs,_isolate:_YMD069J	1
																																																D00355.1_Cucumber_mosaic_virus_gene_for_large_ORF,_complete_cds,_RNA2	1
																																																KC527809.1_Cucumber_mosaic_virus_isolate_RP39_segment_RNA1,cs	1
																																																MG779341.1_Bandra_megavirus_isolate_KK-1_genomic_sequence	1
																																																LC066502.1_Cucumber_mosaic_virus_genomic_RNA,_segment:_2,cs,_isolate:_TUR54	1
																																																GU327368.1_Cucumber_mosaic_virus_strain_Z1_segment_RNA-3,cs	1
																																																X14112.1_Human_herpesvirus_1_complete_genome	1
																																																KX660757.1_Cucumber_mosaic_virus_isolate_Anhui_segment_RNA2,cs	1
																																																KT310081.1_Cucumber_mosaic_virus_isolate_RPDJ_segment_RNA2,cs	1
																																																KC527801.1_Cucumber_mosaic_virus_isolate_RP28_segment_RNA1,cs	1
																																																LC066410.1_Cucumber_mosaic_virus_genomic_RNA,_segment:_3,cs,_isolate:_IWD041J	1
																																																AB124834.1_Cucumber_mosaic_virus_RNA_1_segment,cs	1
																																																KC527776.1_Cucumber_mosaic_virus_isolate_RP2_segment_RNA1,cs	1
																																																LT576867.1_Herpes_simplex_virus_(type_1_/_strain_17)_genome_assembly,_chromosome:_I	1
																																																LC066460.1_Cucumber_mosaic_virus_genomic_RNA,_segment:_2,cs,_isolate:_IRN-BRE5	1
																																																D10538.1_Cucumber_mosaic_virus_genomic_RNA,_segment_RNA_3,cs,_strain:_Fny	1
																																																LC066453.1_Cucumber_mosaic_virus_genomic_RNA,_segment:_1,cs,_isolate:_YMD068J	1
																																																HE971688.1_Cucumber_mosaic_virus_partial_CP_gene_for_coat_protein,_segment_RNA3,_genomic_RNA,_isolate_RJ2.1/09	1
																																																MG470800.1_Cucumber_mosaic_virus_isolate_R1_segment_RNA3_3a_protein_gene,_partial_cds;_and_coat_protein_gene,_complete_cds	1
																																																LT594109.1_Human_herpesvirus_1_isolate_270_2007_genome_assembly,cg:_monopartite	1
																																																HE971604.1_Cucumber_mosaic_virus_partial_CP_gene_for_coat_protein,_segment_RNA3,_genomic_RNA,_isolate_OSA1/09	1
																																																HE971613.1_Cucumber_mosaic_virus_partial_CP_gene_for_coat_protein,_segment_RNA3,_genomic_RNA,_isolate_AOU1.9/09	1
																																																HE971633.1_Cucumber_mosaic_virus_partial_CP_gene_for_coat_protein,_segment_RNA3,_genomic_RNA,_isolate_NU6/09	1
																																																LC066437.1_Cucumber_mosaic_virus_genomic_RNA,_segment:_3,cs,_isolate:_OD291J	1
																																																LT594112.1_Human_herpesvirus_1_isolate_369_2007_genome_assembly,cg:_monopartite	1
																																																LC066514.1_Cucumber_mosaic_virus_genomic_RNA,_segment:_2,cs,_isolate:_TUR86	1
																																																LC066469.1_Cucumber_mosaic_virus_genomic_RNA,_segment:_2,cs,_isolate:_IRN-REY6	1
																																																MG602507.1_UNVERIFIED:_Acanthamoeba_polyphaga_mimivirus,_partial_genome	1
																																																HE971519.1_Cucumber_mosaic_virus_partial_ORF2a_gene_and_ORF2b_gene,_segment_RNA2,_genomic_RNA,_isolate_NU7/09	1
																																																LC066400.1_Cucumber_mosaic_virus_genomic_RNA,_segment:_2,cs,_isolate:_AKD822J	1
																																																LC066463.1_Cucumber_mosaic_virus_genomic_RNA,_segment:_2,cs,_isolate:_IRN-Khs1	1
																																																HE971623.1_Cucumber_mosaic_virus_partial_CP_gene_for_coat_protein,_segment_RNA3,_genomic_RNA,_isolate_Z2.2/09	1
																																																KC527692.1_Cucumber_mosaic_virus_isolate_RP8_segment_RNA2,cs	1
																																																LC066518.1_Cucumber_mosaic_virus_genomic_RNA,_segment:_3,cs,_isolate:_TUR89	1
																																																AB079891.1_Cucumber_mosaic_virus_RNA3,cs,_strain:36a1	1
																																																KC527806.1_Cucumber_mosaic_virus_isolate_RP34_segment_RNA1,cs	1
																																																HE971690.1_Cucumber_mosaic_virus_partial_CP_gene_for_coat_protein,_segment_RNA3,_genomic_RNA,_isolate_B1.3/09	1
																																																LC066491.1_Cucumber_mosaic_virus_genomic_RNA,_segment:_3,cs,_isolate:_IRN-WRN15	1
																																																KC527817.1_Cucumber_mosaic_virus_isolate_RP48_segment_RNA1,cs	1
																																																HE971615.1_Cucumber_mosaic_virus_partial_CP_gene_for_coat_protein,_segment_RNA3,_genomic_RNA,_isolate_AOU2.3/09	1
																																																LC066474.1_Cucumber_mosaic_virus_genomic_RNA,_segment:_1,cs,_isolate:_IRN-SisSh64	1
																																																JN555585.1_Human_herpesvirus_1_strain_17,cg	1
																																																HQ916353.1_Cucumber_mosaic_virus_isolate_Gd_RNA-dependent_RNA_polymerase_(2a)_and_virus-induced_gene_silencing_supressor_(2b)_genes,_complete_cds	1
																																																KC527749.1_Cucumber_mosaic_virus_isolate_RP20_segment_RNA3,cs	1
																																																HE971635.1_Cucumber_mosaic_virus_partial_CP_gene_for_coat_protein,_segment_RNA3,_genomic_RNA,_isolate_NU8/09	1
																																																KC527800.1_Cucumber_mosaic_virus_isolate_RP27_segment_RNA1,cs	1
																																																NC_024310.1_Cynoglossus_semilaevis_isolate_Cse_v1.0_chromosome_4,_Cse_v1.0,wgss	1
																																																LC066413.1_Cucumber_mosaic_virus_genomic_RNA,_segment:_3,cs,_isolate:_KD302J	1
																																																KC527728.1_Cucumber_mosaic_virus_isolate_RP49_segment_RNA2,cs	1
																																																HE971609.1_Cucumber_mosaic_virus_partial_CP_gene_for_coat_protein,_segment_RNA3,_genomic_RNA,_isolate_OSA8/09	1
																																																EF213024.1_Cucumber_mosaic_virus_strain_CTL_segment_RNA2,cs	1
																																																AM183118.1_Cucumber_mosaic_virus_(strain_Ri-8)_genomic_RNA_segment_RNA2,_strain_Ri-8,cs	1
																																																KC527781.1_Cucumber_mosaic_virus_isolate_RP7_segment_RNA1,cs	1

## Sheet: Summary2
AB010300.1_Garlic_virus_A_genomic_RNA,cg	209001902R:3	209001905R:1	209001906R:1
AB079889.1_Cucumber_mosaic_virus_RNA1,cs,_strain:36a1	209001910R:4
AB079891.1_Cucumber_mosaic_virus_RNA3,cs,_strain:36a1	209001910R:1
AB124834.1_Cucumber_mosaic_virus_RNA_1_segment,cs	209001910R:1
AB124835.1_Cucumber_mosaic_virus_RNA_2_segment,cs	209001910R:16
AB188228.1_Cucumber_mosaic_virus_RNA1_segment,cs,_isolate:Mi	209001910R:4
AB188233.1_Cucumber_mosaic_virus_RNA3_segment,cs,_isolate:Fuka4-4	209001910R:1
AB188234.1_Cucumber_mosaic_virus_RNA1_segment,cs,_isolate:CM95	209001910R:4
AB331651.1_Bovine_papillomavirus-10_DNA,cg	209001889R:3	209001890R:1	209001912R:21
AB368496.1_Cucumber_mosaic_virus_genomic_RNA,_segment_RNA1,cs,_isolate:_42CM	209001910R:5
AB368500.1_Cucumber_mosaic_virus_isolate_PF_segment_RNA2,cs	209001910R:2
AB506795.1_Cucumber_mosaic_virus_RNA_1,cs,_strain:_Li	209001910R:1
AB506797.1_Cucumber_mosaic_virus_RNA_3,cs,_strain:_Li	209001910R:13
AB506799.1_Cucumber_mosaic_virus_RNA_2,cs,_strain:_LiCB	209001910R:3
AB506800.1_Cucumber_mosaic_virus_RNA_3,cs,_strain:_LiCB	209001910R:9
AB523788.1_Cucurbit_chlorotic_yellows_virus_RNA_1_segment,cs	209001896R:1
AB523789.1_Cucurbit_chlorotic_yellows_virus_RNA_2_segment,cs	209001896R:1
AB920561.1_Cucumber_mosaic_virus_genomic_RNA,_segment_RNA1,cs,_strain:_m1	209001910R:2
AF013254.1_Human_respiratory_syncytial_virus_wildtype_strain_B1,cg	209001894R:10
AF033808.1_Rous_sarcoma_virus,cg	209001904R:4
AF033811.1_Moloney_murine_leukemia_virus,cg	209001895R:1
AF169561.2_Turnip_mosaic_virus_strain_UK1,cg	209001903R:1
AF190123.1_Tobacco_vein-clearing_virus,cg	209001902R:5	209001909R:2
AF332868.1_Tomato_mosaic_virus_isolate_Queensland,cg	209001898R:133	209001905R:2
AF440570.1_Shrimp_white_spot_syndrome_virus,cg	209001888R:20	209001889R:30	209001890R:164	209001891R:1	209001894R:1	209001895R:2	209001899R:1	209001902R:4	209001907R:3	209001909R:1	209001912R:104
AJ276481.1_Cucumber_mosaic_virus_(strain_Mf),_complete_RNA3_segment	209001910R:47
AJ292226.1_Garlic_latent_virus_complete_genomic_RNA,_isolate_YH1	209001898R:2	209001905R:1	209001906R:1
AJ307057.1_Leek_yellow_stripe_potyvirus_genomic_RNA_for_viral_polyprotein,_isolate_Yuhang_GYH	209001906R:11
AJ507799.2_Human_herpesvirus_4_complete_wild_type_genome	209001889R:1	209001902R:3	209001907R:2	209001908R:3	209001910R:11
AJ510223.1_Onion_yellow_dwarf_virus_gene_for_polyprotein,_genomic_RNA,_isolate_Yuhang	209001906R:4
AJ511989.1_Cucumber_mosaic_virus_2a_gene_for_RNA_dependent_RNA_polymerase_and_2b_gene_for_VIGS_supressor,_genomic_RNA	209001910R:2
AJ580953.1_Cucumber_mosaic_virus_1a_gene,_genomic_RNA,_strain_Ns	209001910R:43
AM183114.1_Cucumber_mosaic_virus_(strain_Pl-1)_genomic_RNA_segment_RNA1,_strain_Pl-1,cs	209001910R:77
AM183115.1_Cucumber_mosaic_virus_(strain_Pl-1)_genomic_RNA_segment_RNA2,_strain_Pl-1,cs	209001910R:16
AM183116.1_Cucumber_mosaic_virus_(strain_Pl-1)_genomic_RNA_segment_RNA3,_strain_Pl-1,cs	209001910R:21
AM183118.1_Cucumber_mosaic_virus_(strain_Ri-8)_genomic_RNA_segment_RNA2,_strain_Ri-8,cs	209001910R:1
AM183119.1_Cucumber_mosaic_virus_(strain_Ri-8)_genomic_RNA_segment_RNA3,_strain_Ri-8,cs	209001910R:1
AP017398.1_Tokyovirus_A1_DNA,_nearly_complete_genome	209001906R:1
AY027810.2_Papaya_ringspot_virus_W_isolate_CI,cg	209001908R:2
AY274119.3_Severe_acute_respiratory_syndrome-related_coronavirus_isolate_Tor2,cg	209001887R:6	209001888R:6	209001889R:9	209001897R:1	209001902R:25	209001903R:8	209001904R:12	209001905R:2	209001909R:16
AY366207.2_Schlumbergera_virus_X_strain_K11,cg	209001896R:1
AY382779.2_Human_papillomavirus_type_96,cg	209001911R:1
AY429435.1_Cucumber_mosaic_virus_segment_RNA1,cs	209001910R:10
AY429436.1_Cucumber_mosaic_virus_segment_RNA2,cs	209001910R:6
AY429437.1_Cucumber_mosaic_virus_segment_RNA3,cs	209001910R:5
BK000407.1_TPA:_Human_adenovirus_type_2,cg	209001887R:4	209001888R:2	209001900R:1	209001901R:2	209001902R:19	209001903R:3	209001904R:18	209001905R:2	209001906R:2	209001907R:4	209001908R:16	209001910R:56	209001911R:4
BK000408.1_TPA:_Human_adenovirus_type_5,cg	209001902R:1	209001904R:1	209001908R:3	209001910R:9	209001911R:1
BK005234.1_TPA:_Human_adenovirus_type_1,cg	209001887R:1	209001902R:6	209001904R:1	209001908R:7	209001910R:8	209001911R:2
D00355.1_Cucumber_mosaic_virus_gene_for_large_ORF,_complete_cds,_RNA2	209001910R:1
D00356.1_Cucumber_mosaic_virus_segment_RNA_1,_5'end_of_virion,_strain:_Fny	209001910R:2
D00530.1_Potato_leafroll_virus_genes_for_28K,_70K,_17K_and_53K_proteins,_RNA-dependent_RNA_polymerase_and_coat_protein,_complete_and_partial_cds	209001896R:18	209001898R:51	209001900R:6
D10538.1_Cucumber_mosaic_virus_genomic_RNA,_segment_RNA_3,cs,_strain:_Fny	209001910R:1
D10930.1_Pea_seed-borne_mosaic_virus_gene_for_polyprotein,_complete_cds	209001899R:1
D12505.1_Cucumber_green_mottle_mosaic_virus_RNA,cg	209001887R:1	209001897R:3	209001908R:4
D14995.2_Apple_stem_grooving_virus_genome,cs	209001896R:1
D16405.1_Cucumber_mosaic_virus_genes_for_movement_protein_and_viral_coat_protein,_complete_cds	209001910R:24
D21829.2_Apple_stem_pitting_virus_genes_for_RNA-dependent_RNA_polymerase,_triple_gene_block_ORFs_and_coat_protein,_complete_cds	209001896R:6	209001911R:1
D28778.1_Cucumber_mosaic_virus_gene_for_1a,_complete_cds,_segment_1	209001910R:93
D28779.1_Cucumber_mosaic_virus_genes_for_2a,_2b,_complete_cds,_segment_2	209001910R:13
D28780.1_Cucumber_mosaic_virus_genes_for_3a,_coat_protein,_complete_cds,_segment_3	209001910R:11
D32136.1_Oryza_sativa_endornavirus_genomic_RNA,cg	209001898R:5	209001905R:41
DQ279927.1_Human_herpesvirus_4_strain_AG876,cg	209001902R:2	209001910R:12
DQ399550.1_Cucumber_mosaic_virus_strain_BX_segment_RNA3,cs	209001910R:4
DQ402477.1_Cucumber_mosaic_virus_isolate_Phy_from_China_segment_RNA1,cs	209001910R:137
DQ412731.1_Cucumber_mosaic_virus_isolate_Phy_segment_RNA2,cs	209001910R:71
DQ412732.1_Cucumber_mosaic_virus_isolate_Phy_segment_RNA3,cs	209001910R:84
DQ491001.1_Paramecium_bursaria_chlorella_virus_MT325_genomic_sequence	209001889R:1	209001893R:177	209001906R:1
EF202596.1_Cucumber_mosaic_virus_isolate_Tsh_segment_RNA2,cs	209001910R:4
EF213023.1_Cucumber_mosaic_virus_strain_CTL_segment_RNA1,cs	209001910R:7
EF213024.1_Cucumber_mosaic_virus_strain_CTL_segment_RNA2,cs	209001910R:1
EF213025.1_Cucumber_mosaic_virus_strain_CTL_segment_RNA3,cs	209001910R:45
EF422221.1_Human_papillomavirus_type_107,cg	209001902R:7
EU410304.1_Vaccinia_virus_GLV-1h68,cg	209001888R:1	209001889R:1	209001903R:3	209001908R:4	209001912R:649
EU414790.1_Cucumber_mosaic_virus_isolate_CMV-QZ_movement_protein_(mp)_gene,_complete_cds	209001910R:102
EU414795.1_Cucumber_mosaic_virus_isolate_CMV-QZ_1a_protein_(1a)_gene,_complete_cds	209001910R:2
EU414796.1_Cucumber_mosaic_virus_isolate_CMV-RZ_1a_protein_(1a)_gene,_partial_cds	209001910R:3
EU414800.1_Cucumber_mosaic_virus_isolate_CMV-QZ_segment_RNA2_2a_protein_(2a)_and_2b_protein_(2b)_genes,_complete_cds	209001910R:84
EU414801.1_Cucumber_mosaic_virus_isolate_CMV-RZ_segment_RNA2_2a_protein_(2a)_and_2b_protein_(2b)_genes,_complete_cds	209001910R:2
EU541441.1_Human_papillomavirus_type_109,cg	209001902R:6
EU723568.1_Cucumber_mosaic_virus_strain_PHz_segment_RNA1,cs	209001910R:61
FJ268744.1_Cucumber_mosaic_virus_isolate_Cah1_segment_RNA1,cs	209001910R:21
FJ268745.1_Cucumber_mosaic_virus_isolate_Cah1_segment_RNA2,cs	209001910R:11
FJ268746.1_Cucumber_mosaic_virus_isolate_Cah1_segment_RNA3,cs	209001910R:54
FJ947080.1_Human_papillomavirus_type_115_isolate_GC02,cg	209001904R:2	209001905R:2	209001907R:1	209001910R:33
FM955839.1_Human_papillomavirus_type_100,cg	209001904R:3
FM955842.1_Human_papillomavirus_type_113,cg	209001910R:6
GU327363.1_Cucumber_mosaic_virus_strain_Rb_segment_RNA-1,cs	209001910R:1
GU327366.1_Cucumber_mosaic_virus_strain_Z1_segment_RNA-1,cs	209001910R:1
GU327368.1_Cucumber_mosaic_virus_strain_Z1_segment_RNA-3,cs	209001910R:1
HE601899.1_Squirrel_poxvirus_strain_Red_squirrel_UK_complete_genome	209001902R:3
HE962478.1_Cucumber_mosaic_virus_RNA1_complete_segment,_genomic_RNA,_strain_Vir	209001910R:19
HE962479.1_Cucumber_mosaic_virus_RNA2_complete_segment,_genomic_RNA,_strain_Vir	209001910R:31
HE962480.1_Cucumber_mosaic_virus_RNA3_complete_segment,_genomic_RNA,_strain_Vir	209001910R:48
HE963831.1_Apple_green_crinkle_associated_virus_complete_genome,_genomic_RNA,_isolate_Aurora-1	209001896R:1
HE971440.1_Cucumber_mosaic_virus_partial_ORF1a_gene_for_helicase,_segment_RNA1,_genomic_RNA,_isolate_DHH3.8/09	209001910R:1
HE971476.1_Cucumber_mosaic_virus_partial_ORF2a_gene_and_ORF2b_gene,_segment_RNA2,_genomic_RNA,_isolate_DH1.8/08	209001910R:2
HE971503.1_Cucumber_mosaic_virus_partial_ORF2a_gene_and_ORF2b_gene,_segment_RNA2,_genomic_RNA,_isolate_Z1.2/09	209001910R:3
HE971519.1_Cucumber_mosaic_virus_partial_ORF2a_gene_and_ORF2b_gene,_segment_RNA2,_genomic_RNA,_isolate_NU7/09	209001910R:1
HE971600.1_Cucumber_mosaic_virus_partial_CP_gene_for_coat_protein,_segment_RNA3,_genomic_RNA,_isolate_DH1.8/08	209001910R:6
HE971604.1_Cucumber_mosaic_virus_partial_CP_gene_for_coat_protein,_segment_RNA3,_genomic_RNA,_isolate_OSA1/09	209001910R:1
HE971606.1_Cucumber_mosaic_virus_partial_CP_gene_for_coat_protein,_segment_RNA3,_genomic_RNA,_isolate_OSA3/09	209001910R:4
HE971609.1_Cucumber_mosaic_virus_partial_CP_gene_for_coat_protein,_segment_RNA3,_genomic_RNA,_isolate_OSA8/09	209001910R:1
HE971612.1_Cucumber_mosaic_virus_partial_CP_gene_for_coat_protein,_segment_RNA3,_genomic_RNA,_isolate_AOU1.8/09	209001910R:5
HE971613.1_Cucumber_mosaic_virus_partial_CP_gene_for_coat_protein,_segment_RNA3,_genomic_RNA,_isolate_AOU1.9/09	209001910R:1
HE971615.1_Cucumber_mosaic_virus_partial_CP_gene_for_coat_protein,_segment_RNA3,_genomic_RNA,_isolate_AOU2.3/09	209001910R:1
HE971616.1_Cucumber_mosaic_virus_partial_CP_gene_for_coat_protein,_segment_RNA3,_genomic_RNA,_isolate_AOU2.4/09	209001910R:2
HE971618.1_Cucumber_mosaic_virus_partial_CP_gene_for_coat_protein,_segment_RNA3,_genomic_RNA,_isolate_AOU2.9/09	209001910R:3
HE971619.1_Cucumber_mosaic_virus_partial_CP_gene_for_coat_protein,_segment_RNA3,_genomic_RNA,_isolate_Z1.2/09	209001910R:3
HE971620.1_Cucumber_mosaic_virus_partial_CP_gene_for_coat_protein,_segment_RNA3,_genomic_RNA,_isolate_Z1.4/09	209001910R:2
HE971622.1_Cucumber_mosaic_virus_partial_CP_gene_for_coat_protein,_segment_RNA3,_genomic_RNA,_isolate_Z1.6/09	209001910R:2
HE971623.1_Cucumber_mosaic_virus_partial_CP_gene_for_coat_protein,_segment_RNA3,_genomic_RNA,_isolate_Z2.2/09	209001910R:1
HE971624.1_Cucumber_mosaic_virus_partial_CP_gene_for_coat_protein,_segment_RNA3,_genomic_RNA,_isolate_Z2.3/09	209001910R:2
HE971626.1_Cucumber_mosaic_virus_partial_CP_gene_for_coat_protein,_segment_RNA3,_genomic_RNA,_isolate_Z2.6/09	209001910R:3
HE971627.1_Cucumber_mosaic_virus_partial_CP_gene_for_coat_protein,_segment_RNA3,_genomic_RNA,_isolate_Z2.8/09	209001910R:4
HE971631.1_Cucumber_mosaic_virus_partial_CP_gene_for_coat_protein,_segment_RNA3,_genomic_RNA,_isolate_NU3/09	209001910R:2
HE971632.1_Cucumber_mosaic_virus_partial_CP_gene_for_coat_protein,_segment_RNA3,_genomic_RNA,_isolate_NU5/09	209001910R:5
HE971633.1_Cucumber_mosaic_virus_partial_CP_gene_for_coat_protein,_segment_RNA3,_genomic_RNA,_isolate_NU6/09	209001910R:1
HE971634.1_Cucumber_mosaic_virus_partial_CP_gene_for_coat_protein,_segment_RNA3,_genomic_RNA,_isolate_NU7/09	209001910R:1
HE971635.1_Cucumber_mosaic_virus_partial_CP_gene_for_coat_protein,_segment_RNA3,_genomic_RNA,_isolate_NU8/09	209001910R:1
HE971636.1_Cucumber_mosaic_virus_partial_CP_gene_for_coat_protein,_segment_RNA3,_genomic_RNA,_isolate_NU10/09	209001910R:3
HE971660.1_Cucumber_mosaic_virus_partial_CP_gene_for_coat_protein,_segment_RNA3,_genomic_RNA,_isolate_BC3.3/09	209001910R:26
HE971668.1_Cucumber_mosaic_virus_partial_CP_gene_for_coat_protein,_segment_RNA3,_genomic_RNA,_isolate_T1.4/09	209001910R:3
HE971669.1_Cucumber_mosaic_virus_partial_CP_gene_for_coat_protein,_segment_RNA3,_genomic_RNA,_isolate_T1.8/09	209001910R:2
HE971670.1_Cucumber_mosaic_virus_partial_CP_gene_for_coat_protein,_segment_RNA3,_genomic_RNA,_isolate_DHH1.1/09	209001910R:78
HE971671.1_Cucumber_mosaic_virus_partial_CP_gene_for_coat_protein,_segment_RNA3,_genomic_RNA,_isolate_DHH1.2/09	209001910R:43
HE971687.1_Cucumber_mosaic_virus_partial_CP_gene_for_coat_protein,_segment_RNA3,_genomic_RNA,_isolate_RJ1.1/09	209001910R:4
HE971688.1_Cucumber_mosaic_virus_partial_CP_gene_for_coat_protein,_segment_RNA3,_genomic_RNA,_isolate_RJ2.1/09	209001910R:1
HE971690.1_Cucumber_mosaic_virus_partial_CP_gene_for_coat_protein,_segment_RNA3,_genomic_RNA,_isolate_B1.3/09	209001910R:1
HE971694.1_Cucumber_mosaic_virus_partial_CP_gene_for_coat_protein,_segment_RNA3,_genomic_RNA,_isolate_B2.2/09	209001910R:45
HE971702.1_Cucumber_mosaic_virus_partial_CP_gene_for_coat_protein,_segment_RNA3,_genomic_RNA,_isolate_UK73/96	209001910R:1
HF572914.1_Cucumber_mosaic_virus_segment_RNA1,_genomic_RNA,_isolate_Bn57	209001910R:19
HM011556.1_Merkel_cell_polyomavirus_isolate_R17b,cg	209001905R:1
HM999989.1_Human_papillomavirus_type_137_isolate_NJ2801H,cg	209001911R:1
HQ283391.1_Cucumber_mosaic_virus_isolate_SFQT1-2_segment_RNA2,cs	209001910R:78
HQ283392.1_Cucumber_mosaic_virus_isolate_SFQT1-2_segment_RNA1,cs	209001910R:248
HQ283393.1_Cucumber_mosaic_virus_isolate_SFQT1-2_segment_RNA3,cs	209001910R:38
HQ339956.1_Apricot_latent_virus_isolate_A18,cg	209001896R:3
HQ413315.1_Human_adenovirus_6_isolate_Tonsil_99,cg	209001887R:2	209001902R:3	209001903R:1	209001904R:2	209001908R:5	209001910R:4	209001911R:1
HQ874434.1_Cucumber_mosaic_virus_isolate_Gd_1a_protein_(1a)_gene,_complete_cds	209001910R:8
HQ916353.1_Cucumber_mosaic_virus_isolate_Gd_RNA-dependent_RNA_polymerase_(2a)_and_virus-induced_gene_silencing_supressor_(2b)_genes,_complete_cds	209001910R:1
J01917.1_Adenovirus_type_2,cg	209001887R:4	209001888R:2	209001890R:1	209001900R:1	209001901R:2	209001902R:19	209001903R:2	209001904R:20	209001905R:1	209001906R:2	209001907R:1	209001908R:18	209001909R:1	209001910R:29	209001911R:4
JF906559.1_Human_papillomavirus_155_isolate_SE42,cg	209001888R:1
JN054635.1_Cucumber_mosaic_virus_strain_CLW2_movement_protein_and_coat_protein_genes,_complete_cds	209001910R:49
JN054636.1_Cucumber_mosaic_virus_strain_CLW2_putative_RNA_helicase_and_methyltransferase_gene,_complete_cds	209001910R:3
JN054637.1_Cucumber_mosaic_virus_strain_CLW2_RNA-dependent_RNA_polymerase_and_2b_protein_genes,_complete_cds	209001910R:16
JN180309.1_Cucumber_mosaic_virus_segment_RNA1,cs	209001910R:7
JN180310.1_Cucumber_mosaic_virus_segment_RNA2,cs	209001910R:4
JN258408.1_Megavirus_chiliensis,cg	209001890R:1
JN555585.1_Human_herpesvirus_1_strain_17,cg	209001910R:1
JN885991.1_Megavirus_courdo7_isolate_Mv13-c7,_partial_genome	209001905R:2
JX014246.1_Cucumber_mosaic_virus_isolate_Va_segment_RNA1,cs	209001910R:10
JX463183.1_STL_polyomavirus_strain_MA138,cg	209001904R:11	209001905R:1	209001911R:1
JX997154.1_Paramecium_bursaria_Chlorella_virus_AP110A,_partial_genome	209001891R:1	209001893R:1	209001894R:1
JX997155.1_Acanthocystis_turfacea_Chlorella_virus_Br0604L,_partial_genome	209001889R:2
JX997160.1_Paramecium_bursaria_Chlorella_virus_CVB-1,_partial_genome	209001891R:1
JX997163.1_Paramecium_bursaria_Chlorella_virus_CVM-1,_partial_genome	209001904R:1
JX997165.1_Paramecium_bursaria_Chlorella_virus_CvsA1,_partial_genome	209001895R:7
JX997170.1_Paramecium_bursaria_Chlorella_virus_IL-5-2s1,_partial_genome	209001901R:1
JX997176.1_Paramecium_bursaria_Chlorella_virus_NE-JV-1,_partial_genome	209001892R:1	209001904R:1
JX997183.1_Paramecium_bursaria_Chlorella_virus_NYs1,_partial_genome	209001889R:1
KC008572.1_UNVERIFIED:_Moumouvirus_goulette,cg	209001896R:8
KC019299.1_Cucumber_mosaic_virus_segment_RNA1,cs	209001910R:9
KC019300.1_Cucumber_mosaic_virus_segment_RNA2,cs	209001910R:79
KC019301.1_Cucumber_mosaic_virus_segment_RNA3,cs	209001910R:97
KC527685.1_Cucumber_mosaic_virus_isolate_RP1_segment_RNA2,cs	209001910R:13
KC527686.1_Cucumber_mosaic_virus_isolate_RP2_segment_RNA2,cs	209001910R:7
KC527687.1_Cucumber_mosaic_virus_isolate_RP3_segment_RNA2,cs	209001910R:2
KC527688.1_Cucumber_mosaic_virus_isolate_RP4_segment_RNA2,cs	209001910R:3
KC527691.1_Cucumber_mosaic_virus_isolate_RP7_segment_RNA2,cs	209001910R:1
KC527692.1_Cucumber_mosaic_virus_isolate_RP8_segment_RNA2,cs	209001910R:1
KC527693.1_Cucumber_mosaic_virus_isolate_RP9_segment_RNA2,cs	209001910R:5
KC527694.1_Cucumber_mosaic_virus_isolate_RP10_segment_RNA2,cs	209001910R:13
KC527695.1_Cucumber_mosaic_virus_isolate_RP11_segment_RNA2,cs	209001910R:11
KC527696.1_Cucumber_mosaic_virus_isolate_RP12_segment_RNA2,cs	209001910R:85
KC527697.1_Cucumber_mosaic_virus_isolate_RP13_segment_RNA2,cs	209001910R:19
KC527698.1_Cucumber_mosaic_virus_isolate_RP14_segment_RNA2,cs	209001910R:2
KC527699.1_Cucumber_mosaic_virus_isolate_RP15_segment_RNA2,cs	209001910R:5
KC527700.1_Cucumber_mosaic_virus_isolate_RP16_segment_RNA2,cs	209001910R:33
KC527701.1_Cucumber_mosaic_virus_isolate_RP17_segment_RNA2,cs	209001910R:3
KC527702.1_Cucumber_mosaic_virus_isolate_RP18_segment_RNA2,cs	209001910R:2
KC527703.1_Cucumber_mosaic_virus_isolate_RP19_segment_RNA2,cs	209001910R:5
KC527707.1_Cucumber_mosaic_virus_isolate_RP24_segment_RNA2,cs	209001910R:43
KC527709.1_Cucumber_mosaic_virus_isolate_RP26_segment_RNA2,cs	209001910R:3
KC527710.1_Cucumber_mosaic_virus_isolate_RP27_segment_RNA2,cs	209001910R:35
KC527712.1_Cucumber_mosaic_virus_isolate_RP29_segment_RNA2,cs	209001910R:2
KC527714.1_Cucumber_mosaic_virus_isolate_RP31_segment_RNA2,cs	209001910R:2
KC527715.1_Cucumber_mosaic_virus_isolate_RP33_segment_RNA2,cs	209001910R:3
KC527717.1_Cucumber_mosaic_virus_isolate_RP35_segment_RNA2,cs	209001910R:3
KC527718.1_Cucumber_mosaic_virus_isolate_RP38_segment_RNA2,cs	209001910R:23
KC527719.1_Cucumber_mosaic_virus_isolate_RP39_segment_RNA2,cs	209001910R:18
KC527720.1_Cucumber_mosaic_virus_isolate_RP40_segment_RNA2,cs	209001910R:2
KC527721.1_Cucumber_mosaic_virus_isolate_RP41_segment_RNA2,cs	209001910R:21
KC527722.1_Cucumber_mosaic_virus_isolate_RP42_segment_RNA2,cs	209001910R:3
KC527723.1_Cucumber_mosaic_virus_isolate_RP44_segment_RNA2,cs	209001910R:5
KC527724.1_Cucumber_mosaic_virus_isolate_RP45_segment_RNA2,cs	209001910R:3
KC527727.1_Cucumber_mosaic_virus_isolate_RP48_segment_RNA2,cs	209001910R:3
KC527728.1_Cucumber_mosaic_virus_isolate_RP49_segment_RNA2,cs	209001910R:1
KC527729.1_Cucumber_mosaic_virus_isolate_RP50_segment_RNA2,cs	209001910R:2	209001912R:1
KC527730.1_Cucumber_mosaic_virus_isolate_RP1_segment_RNA3,cs	209001910R:11
KC527731.1_Cucumber_mosaic_virus_isolate_RP2_segment_RNA3,cs	209001910R:3
KC527732.1_Cucumber_mosaic_virus_isolate_RP3_segment_RNA3,cs	209001906R:1	209001910R:3
KC527733.1_Cucumber_mosaic_virus_isolate_RP4_segment_RNA3,cs	209001910R:41
KC527734.1_Cucumber_mosaic_virus_isolate_RP5_segment_RNA3,cs	209001910R:54	209001912R:1
KC527735.1_Cucumber_mosaic_virus_isolate_RP6_segment_RNA3,cs	209001910R:31
KC527736.1_Cucumber_mosaic_virus_isolate_RP7_segment_RNA3,cs	209001910R:4
KC527737.1_Cucumber_mosaic_virus_isolate_RP8_segment_RNA3,cs	209001910R:4
KC527738.1_Cucumber_mosaic_virus_isolate_RP9_segment_RNA3,cs	209001910R:6
KC527739.1_Cucumber_mosaic_virus_isolate_RP10_segment_RNA3,cs	209001910R:6
KC527740.1_Cucumber_mosaic_virus_isolate_RP11_segment_RNA3,cs	209001910R:4
KC527741.1_Cucumber_mosaic_virus_isolate_RP12_segment_RNA3,cs	209001910R:13
KC527742.1_Cucumber_mosaic_virus_isolate_RP13_segment_RNA3,cs	209001910R:8
KC527743.1_Cucumber_mosaic_virus_isolate_RP14_segment_RNA3,cs	209001910R:15
KC527744.1_Cucumber_mosaic_virus_isolate_RP15_segment_RNA3,cs	209001910R:7
KC527745.1_Cucumber_mosaic_virus_isolate_RP16_segment_RNA3,cs	209001910R:9
KC527746.1_Cucumber_mosaic_virus_isolate_RP17_segment_RNA3,cs	209001910R:13	209001912R:1
KC527747.1_Cucumber_mosaic_virus_isolate_RP18_segment_RNA3,cs	209001910R:17
KC527748.1_Cucumber_mosaic_virus_isolate_RP19_segment_RNA3,cs	209001910R:10	209001912R:1
KC527749.1_Cucumber_mosaic_virus_isolate_RP20_segment_RNA3,cs	209001910R:1
KC527750.1_Cucumber_mosaic_virus_isolate_RP22_segment_RNA3,cs	209001910R:7
KC527752.1_Cucumber_mosaic_virus_isolate_RP24_segment_RNA3,cs	209001906R:2	209001910R:9
KC527753.1_Cucumber_mosaic_virus_isolate_RP25_segment_RNA3,cs	209001910R:7
KC527755.1_Cucumber_mosaic_virus_isolate_RP27_segment_RNA3,cs	209001910R:72
KC527756.1_Cucumber_mosaic_virus_isolate_RP28_segment_RNA3,cs	209001910R:1
KC527757.1_Cucumber_mosaic_virus_isolate_RP29_segment_RNA3,cs	209001910R:5
KC527759.1_Cucumber_mosaic_virus_isolate_RP31_segment_RNA3,cs	209001910R:12
KC527760.1_Cucumber_mosaic_virus_isolate_RP33_segment_RNA3,cs	209001910R:13
KC527761.1_Cucumber_mosaic_virus_isolate_RP34_segment_RNA3,cs	209001910R:9	209001912R:1
KC527762.1_Cucumber_mosaic_virus_isolate_RP35_segment_RNA3,cs	209001906R:2	209001910R:21
KC527763.1_Cucumber_mosaic_virus_isolate_RP38_segment_RNA3,cs	209001910R:6
KC527764.1_Cucumber_mosaic_virus_isolate_RP39_segment_RNA3,cs	209001910R:5
KC527765.1_Cucumber_mosaic_virus_isolate_RP40_segment_RNA3,cs	209001910R:4
KC527766.1_Cucumber_mosaic_virus_isolate_RP41_segment_RNA3,cs	209001910R:8
KC527767.1_Cucumber_mosaic_virus_isolate_RP42_segment_RNA3,cs	209001910R:12
KC527768.1_Cucumber_mosaic_virus_isolate_RP44_segment_RNA3,cs	209001910R:33
KC527769.1_Cucumber_mosaic_virus_isolate_RP45_segment_RNA3,cs	209001910R:2
KC527770.1_Cucumber_mosaic_virus_isolate_RP46_segment_RNA3,cs	209001910R:2
KC527772.1_Cucumber_mosaic_virus_isolate_RP48_segment_RNA3,cs	209001898R:1	209001910R:6
KC527773.1_Cucumber_mosaic_virus_isolate_RP49_segment_RNA3,cs	209001910R:2
KC527774.1_Cucumber_mosaic_virus_isolate_RP50_segment_RNA3,cs	209001906R:1	209001910R:3
KC527776.1_Cucumber_mosaic_virus_isolate_RP2_segment_RNA1,cs	209001910R:1
KC527779.1_Cucumber_mosaic_virus_isolate_RP5_segment_RNA1,cs	209001910R:2
KC527780.1_Cucumber_mosaic_virus_isolate_RP6_segment_RNA1,cs	209001910R:2
KC527781.1_Cucumber_mosaic_virus_isolate_RP7_segment_RNA1,cs	209001910R:1
KC527782.1_Cucumber_mosaic_virus_isolate_RP8_segment_RNA1,cs	209001910R:2
KC527783.1_Cucumber_mosaic_virus_isolate_RP9_segment_RNA1,cs	209001910R:3
KC527784.1_Cucumber_mosaic_virus_isolate_RP10_segment_RNA1,cs	209001910R:4	209001912R:1
KC527785.1_Cucumber_mosaic_virus_isolate_RP11_segment_RNA1,cs	209001910R:25
KC527786.1_Cucumber_mosaic_virus_isolate_RP12_segment_RNA1,cs	209001910R:23	209001912R:1
KC527787.1_Cucumber_mosaic_virus_isolate_RP13_segment_RNA1,cs	209001910R:20
KC527788.1_Cucumber_mosaic_virus_isolate_RP14_segment_RNA1,cs	209001910R:1
KC527789.1_Cucumber_mosaic_virus_isolate_RP15_segment_RNA1,cs	209001910R:7
KC527790.1_Cucumber_mosaic_virus_isolate_RP16_segment_RNA1,cs	209001910R:5
KC527791.1_Cucumber_mosaic_virus_isolate_RP17_segment_RNA1,cs	209001910R:4
KC527794.1_Cucumber_mosaic_virus_isolate_RP20_segment_RNA1,cs	209001910R:45
KC527795.1_Cucumber_mosaic_virus_isolate_RP22_segment_RNA1,cs	209001910R:50
KC527796.1_Cucumber_mosaic_virus_isolate_RP23_segment_RNA1,cs	209001910R:5
KC527797.1_Cucumber_mosaic_virus_isolate_RP24_segment_RNA1,cs	209001898R:1	209001910R:4
KC527798.1_Cucumber_mosaic_virus_isolate_RP25_segment_RNA1,cs	209001910R:3
KC527799.1_Cucumber_mosaic_virus_isolate_RP26_segment_RNA1,cs	209001910R:6
KC527800.1_Cucumber_mosaic_virus_isolate_RP27_segment_RNA1,cs	209001910R:1
KC527801.1_Cucumber_mosaic_virus_isolate_RP28_segment_RNA1,cs	209001910R:1
KC527802.1_Cucumber_mosaic_virus_isolate_RP29_segment_RNA1,cs	209001910R:2
KC527803.1_Cucumber_mosaic_virus_isolate_RP30_segment_RNA1,cs	209001910R:1
KC527804.1_Cucumber_mosaic_virus_isolate_RP31_segment_RNA1,cs	209001910R:3	209001912R:1
KC527805.1_Cucumber_mosaic_virus_isolate_RP33_segment_RNA1,cs	209001910R:4
KC527806.1_Cucumber_mosaic_virus_isolate_RP34_segment_RNA1,cs	209001910R:1
KC527807.1_Cucumber_mosaic_virus_isolate_RP35_segment_RNA1,cs	209001910R:5
KC527808.1_Cucumber_mosaic_virus_isolate_RP38_segment_RNA1,cs	209001910R:4
KC527809.1_Cucumber_mosaic_virus_isolate_RP39_segment_RNA1,cs	209001910R:1
KC527810.1_Cucumber_mosaic_virus_isolate_RP40_segment_RNA1,cs	209001910R:2
KC527811.1_Cucumber_mosaic_virus_isolate_RP41_segment_RNA1,cs	209001910R:3
KC527812.1_Cucumber_mosaic_virus_isolate_RP42_segment_RNA1,cs	209001910R:6	209001912R:1
KC527813.1_Cucumber_mosaic_virus_isolate_RP44_segment_RNA1,cs	209001910R:3
KC527814.1_Cucumber_mosaic_virus_isolate_RP45_segment_RNA1,cs	209001910R:3
KC527816.1_Cucumber_mosaic_virus_isolate_RP47_segment_RNA1,cs	209001910R:4
KC527817.1_Cucumber_mosaic_virus_isolate_RP48_segment_RNA1,cs	209001910R:1
KC527818.1_Cucumber_mosaic_virus_isolate_RP49_segment_RNA1,cs	209001910R:9
KC527819.1_Cucumber_mosaic_virus_isolate_RP50_segment_RNA1,cs	209001910R:4
KC693009.1_Cucumber_mosaic_virus_isolate_ZMBJ_segment_RNA3,cs	209001896R:1	209001910R:32
KF477193.1_Tomato_mottle_mosaic_virus_isolate_MX5,cg	209001898R:33	209001905R:1
KF800043.1_Citrus_endogenous_pararetrovirus_clone_CB16-3,cg	209001902R:12
KF893260.1_Human_respiratory_syncytial_virus_B_strain_N2,cg	209001894R:6
KJ400002.1_Cucumber_mosaic_virus_isolate_209_segment_RNA1,cs	209001898R:1	209001910R:37
KJ400003.1_Cucumber_mosaic_virus_isolate_209_segment_RNA2,cs	209001910R:9
KM272275.1_Cucumber_mosaic_virus_strain_KO_segment_RNA3,cs	209001910R:134
KM272277.1_Cucumber_mosaic_virus_strain_KO_segment_RNA1,cs	209001910R:4
KM272278.1_Cucumber_mosaic_virus_strain_KO_segment_RNA2,cs	209001910R:21
KM379144.1_Garlic_virus_B_isolate_Mesi_13,cg	209001906R:2
KM982402.1_UNVERIFIED:_Acanthamoeba_polyphaga_mimivirus_strain_Kroon,cg	209001891R:1	209001894R:2	209001909R:1
KP033524.1_Cucumber_mosaic_virus_isolate_GTN_segment_RNA1,cs	209001910R:45
KP033526.1_Cucumber_mosaic_virus_isolate_GTN_segment_RNA3,cs	209001910R:11
KP165580.1_Cucumber_mosaic_virus_isolate_PV0187_segment_RNA1_1a_protein_gene,_complete_cds	209001910R:4
KP165582.1_Cucumber_mosaic_virus_isolate_PV0187_segment_RNA3_3a_protein_and_3b_protein_genes,_complete_cds	209001910R:2
KP313240.1_Citrus_yellow_vein_clearing_virus_isolate_CQ,cg	209001890R:45	209001898R:1
KR535605.1_Cucumber_mosaic_virus_isolate_CMV-KoPF_segment_RNA1,cs	209001910R:2
KT004542.1_Cucumber_mosaic_virus_strain_WN1_segment_RNA1,cs	209001910R:39
KT004543.1_Cucumber_mosaic_virus_strain_WN1_segment_RNA2,cs	209001910R:4
KT004544.1_Cucumber_mosaic_virus_strain_WN1_segment_RNA3,cs	209001910R:18
KT310080.1_Cucumber_mosaic_virus_isolate_RPDJ_segment_RNA1,cs	209001910R:4
KT310081.1_Cucumber_mosaic_virus_isolate_RPDJ_segment_RNA2,cs	209001910R:1
KT310082.1_Cucumber_mosaic_virus_isolate_RPDJ_segment_RNA3,cs	209001910R:15
KT350980.1_Cucumber_mosaic_virus_isolate_ZMBJ_segment_RNA1,cs	209001910R:122
KT350981.1_Cucumber_mosaic_virus_isolate_ZMBJ_segment_RNA2,cs	209001910R:17
KT721705.1_Hordeum_vulgare_endornavirus,cg	209001912R:1
KT995472.1_White_spot_syndrome_virus_strain_CN01,cg	209001909R:1
KU255787.1_Cucumber_mosaic_virus_strain_DS_segment_RNA1,cs	209001910R:13
KU255788.1_Cucumber_mosaic_virus_strain_DS_segment_RNA2,cs	209001910R:13
KU255789.1_Cucumber_mosaic_virus_strain_DS_segment_RNA3,cs	209001910R:4
KU255790.1_Cucumber_mosaic_virus_strain_DA_segment_RNA1,cs	209001910R:12
KU255791.1_Cucumber_mosaic_virus_strain_DA_segment_RNA2,cs	209001910R:135
KU255792.1_Cucumber_mosaic_virus_strain_DA_segment_RNA3,cs	209001910R:12
KU947029.1_Cucumber_mosaic_virus_segment_RNA1,cs	209001910R:8
KU947031.1_Cucumber_mosaic_virus_segment_RNA3,cs	209001910R:5
KX396056.1_Primate_norovirus_strain_SimianNoV-nj,cg	209001899R:1
KX660756.1_Cucumber_mosaic_virus_isolate_Anhui_segment_RNA1,cs	209001910R:23
KX660757.1_Cucumber_mosaic_virus_isolate_Anhui_segment_RNA2,cs	209001910R:1
KX660758.1_Cucumber_mosaic_virus_isolate_Anhui_segment_RNA3,cs	209001910R:143
KY038943.1_Tobacco_virus_2,cg	209001896R:3	209001898R:12
KY040274.1_Molluscum_contagiosum_virus_subtype_2_isolate_Madrid_2016_1,cg	209001887R:2	209001890R:1	209001902R:14	209001904R:1	209001910R:7
KY110734.1_Saudi_moumouvirus,_partial_genome	209001892R:1	209001897R:2
KY249656.1_Human_respiratory_syncytial_virus_B_isolate_RSVB/England136/2014,cg	209001894R:55
KY249657.1_Human_respiratory_syncytial_virus_B_isolate_RSVB/England263/2014,cg	209001894R:59
KY249658.1_Human_respiratory_syncytial_virus_B_isolate_RSVB/England167/2014,cg	209001894R:21
KY249659.1_Human_respiratory_syncytial_virus_B_isolate_RSVB/England595/2013,cg	209001894R:16
KY249660.1_Human_respiratory_syncytial_virus_B_isolate_RSVB/England583/2013,cg	209001894R:163
KY249661.1_Human_respiratory_syncytial_virus_B_isolate_RSVB/England015/2013,cg	209001894R:8
KY249662.1_Human_respiratory_syncytial_virus_B_isolate_RSVB/England080/2013,cg	209001894R:18
KY249663.1_Human_respiratory_syncytial_virus_B_isolate_RSVB/England005/2013,cg	209001894R:23
KY249664.1_Human_respiratory_syncytial_virus_B_isolate_RSVB/England135/2013,cg	209001894R:42
KY249665.1_Human_respiratory_syncytial_virus_B_isolate_RSVB/England617/2013,cg	209001894R:33
KY249666.1_Human_respiratory_syncytial_virus_B_isolate_RSVB/England400/2013,cg	209001894R:18
KY249667.1_Human_respiratory_syncytial_virus_B_isolate_RSVB/England313/2012,cg	209001894R:71
KY249668.1_Human_respiratory_syncytial_virus_B_isolate_RSVB/England453/2012,cg	209001894R:27
KY249669.1_Human_respiratory_syncytial_virus_B_isolate_RSVB/England787/2012,cg	209001894R:22
KY249670.1_Human_respiratory_syncytial_virus_B_isolate_RSVB/England783/2012,cg	209001894R:33
KY249671.1_Human_respiratory_syncytial_virus_B_isolate_RSVB/England864/2012,cg	209001894R:19
KY249672.1_Human_respiratory_syncytial_virus_B_isolate_RSVB/England198/2012,cg	209001894R:20
KY249673.1_Human_respiratory_syncytial_virus_B_isolate_RSVB/England537/2012,cg	209001894R:71
KY249674.1_Human_respiratory_syncytial_virus_B_isolate_RSVB/England127/2012,cg	209001894R:16
KY249675.1_Human_respiratory_syncytial_virus_B_isolate_RSVB/England306/2012,cg	209001894R:16
KY249676.1_Human_respiratory_syncytial_virus_B_isolate_RSVB/England133/2012,cg	209001894R:16
KY249677.1_Human_respiratory_syncytial_virus_B_isolate_RSVB/England132/2012,cg	209001894R:33
KY249678.1_Human_respiratory_syncytial_virus_B_isolate_RSVB/England122/2011,cg	209001894R:40
KY249679.1_Human_respiratory_syncytial_virus_B_isolate_RSVB/England002/2011,cg	209001894R:38
KY249680.1_Human_respiratory_syncytial_virus_B_isolate_RSVB/England447/2011,cg	209001894R:25
KY249681.1_Human_respiratory_syncytial_virus_B_isolate_RSVB/England138/2016,cg	209001894R:109
KY249682.1_Human_respiratory_syncytial_virus_B_isolate_RSVB/England136/2016,cg	209001894R:100
KY249683.1_Human_respiratory_syncytial_virus_B_isolate_RSVB/England133/2016,cg	209001894R:94
KY399057.1_Picobirnavirus_dog/KNA/2015_strain_PBV/Dog/KNA/RVC7/2015_RNA-dependent_RNA_polymerase_gene,_complete_cds	209001899R:2
KY674983.1_Human_respiratory_syncytial_virus_B_strain_16F10,cg	209001894R:6
KY674984.1_Human_respiratory_syncytial_virus_B_strain_16B7,cg	209001894R:108
KY684085.1_Indivirus_ILV1_Indivirus_1_genomic_sequence	209001889R:6	209001891R:16	209001895R:3	209001904R:225	209001905R:43	209001909R:16
KY684105.1_Hokovirus_HKV1_Hokovirus_3_genomic_sequence	209001888R:12	209001905R:35	209001908R:2
KY684109.1_Klosneuvirus_KNV1_Klosneuvirus_2_genomic_sequence	209001888R:1	209001889R:2	209001895R:4	209001907R:2
KY684110.1_Klosneuvirus_KNV1_Klosneuvirus_3_genomic_sequence	209001888R:3	209001890R:1	209001894R:2	209001904R:1
KY684758.1_Human_respiratory_syncytial_virus_B_strain_SC2225,cg	209001894R:81
KY794709.1_Cucumber_mosaic_virus_isolate_Met_segment_RNA2,cs	209001910R:34
KY794710.1_Cucumber_mosaic_virus_isolate_Met_segment_RNA3,cs	209001910R:187
KY886411.1_Cucumber_mosaic_virus_isolate_CMV-SP_segment_RNA3,cs	209001910R:3
KY924878.1_Human_respiratory_syncytial_virus_B_strain_RSVB/BCH-Y/2016,cg	209001894R:66
LC066400.1_Cucumber_mosaic_virus_genomic_RNA,_segment:_2,cs,_isolate:_AKD822J	209001910R:1
LC066401.1_Cucumber_mosaic_virus_genomic_RNA,_segment:_3,cs,_isolate:_AKD822J	209001896R:1	209001910R:3
LC066402.1_Cucumber_mosaic_virus_genomic_RNA,_segment:_1,cs,_isolate:_EHD732J	209001910R:3
LC066405.1_Cucumber_mosaic_virus_genomic_RNA,_segment:_1,cs,_isolate:_GFD560J	209001910R:4
LC066407.1_Cucumber_mosaic_virus_genomic_RNA,_segment:_3,cs,_isolate:_GFD560J	209001910R:33
LC066408.1_Cucumber_mosaic_virus_genomic_RNA,_segment:_1,cs,_isolate:_IWD041J	209001910R:8
LC066409.1_Cucumber_mosaic_virus_genomic_RNA,_segment:_2,cs,_isolate:_IWD041J	209001910R:2
LC066410.1_Cucumber_mosaic_virus_genomic_RNA,_segment:_3,cs,_isolate:_IWD041J	209001910R:1
LC066411.1_Cucumber_mosaic_virus_genomic_RNA,_segment:_1,cs,_isolate:_KD302J	209001910R:18
LC066413.1_Cucumber_mosaic_virus_genomic_RNA,_segment:_3,cs,_isolate:_KD302J	209001910R:1
LC066414.1_Cucumber_mosaic_virus_genomic_RNA,_segment:_1,cs,_isolate:_MD965J	209001910R:32
LC066417.1_Cucumber_mosaic_virus_genomic_RNA,_segment:_1,cs,_isolate:_MED303J	209001910R:11
LC066420.1_Cucumber_mosaic_virus_genomic_RNA,_segment:_1,cs,_isolate:_MS655J	209001910R:91
LC066423.1_Cucumber_mosaic_virus_genomic_RNA,_segment:_1,cs,_isolate:_ND278J	209001910R:5
LC066424.1_Cucumber_mosaic_virus_genomic_RNA,_segment:_2,cs,_isolate:_ND278J	209001910R:3
LC066426.1_Cucumber_mosaic_virus_genomic_RNA,_segment:_1,cs,_isolate:_NID045J	209001910R:16
LC066427.1_Cucumber_mosaic_virus_genomic_RNA,_segment:_2,cs,_isolate:_NID045J	209001910R:15
LC066429.1_Cucumber_mosaic_virus_genomic_RNA,_segment:_1,cs,_isolate:_NND454J	209001910R:4
LC066435.1_Cucumber_mosaic_virus_genomic_RNA,_segment:_1,cs,_isolate:_OD291J	209001910R:42
LC066437.1_Cucumber_mosaic_virus_genomic_RNA,_segment:_3,cs,_isolate:_OD291J	209001910R:1
LC066438.1_Cucumber_mosaic_virus_genomic_RNA,_segment:_1,cs,_isolate:_OGI11X2	209001910R:5
LC066441.1_Cucumber_mosaic_virus_genomic_RNA,_segment:_1,cs,_isolate:_OGI12J3	209001910R:6
LC066444.1_Cucumber_mosaic_virus_genomic_RNA,_segment:_1,cs,_isolate:_TKD766J	209001910R:3
LC066448.1_Cucumber_mosaic_virus_genomic_RNA,_segment:_2,cs,_isolate:_TRT611J	209001910R:13
LC066450.1_Cucumber_mosaic_virus_genomic_RNA,_segment:_1,cs,_isolate:_TYD083J	209001910R:10
LC066453.1_Cucumber_mosaic_virus_genomic_RNA,_segment:_1,cs,_isolate:_YMD068J	209001910R:1
LC066454.1_Cucumber_mosaic_virus_genomic_RNA,_segment:_2,cs,_isolate:_YMD068J	209001910R:3
LC066456.1_Cucumber_mosaic_virus_genomic_RNA,_segment:_1,cs,_isolate:_YMD069J	209001910R:2
LC066457.1_Cucumber_mosaic_virus_genomic_RNA,_segment:_2,cs,_isolate:_YMD069J	209001910R:1
LC066460.1_Cucumber_mosaic_virus_genomic_RNA,_segment:_2,cs,_isolate:_IRN-BRE5	209001910R:1
LC066461.1_Cucumber_mosaic_virus_genomic_RNA,_segment:_3,cs,_isolate:_IRN-BRE5	209001910R:5
LC066463.1_Cucumber_mosaic_virus_genomic_RNA,_segment:_2,cs,_isolate:_IRN-Khs1	209001910R:1
LC066464.1_Cucumber_mosaic_virus_genomic_RNA,_segment:_3,cs,_isolate:_IRN-Khs1	209001910R:36
LC066466.1_Cucumber_mosaic_virus_genomic_RNA,_segment:_2,cs,_isolate:_IRN-REY4	209001910R:1
LC066467.1_Cucumber_mosaic_virus_genomic_RNA,_segment:_3,cs,_isolate:_IRN-REY4	209001910R:10
LC066469.1_Cucumber_mosaic_virus_genomic_RNA,_segment:_2,cs,_isolate:_IRN-REY6	209001910R:1
LC066470.1_Cucumber_mosaic_virus_genomic_RNA,_segment:_3,cs,_isolate:_IRN-REY6	209001910R:46
LC066471.1_Cucumber_mosaic_virus_genomic_RNA,_segment:_1,cs,_isolate:_IRN-REY10	209001910R:1
LC066472.1_Cucumber_mosaic_virus_genomic_RNA,_segment:_2,cs,_isolate:_IRN-REY10	209001910R:1
LC066473.1_Cucumber_mosaic_virus_genomic_RNA,_segment:_3,cs,_isolate:_IRN-REY10	209001910R:34
LC066474.1_Cucumber_mosaic_virus_genomic_RNA,_segment:_1,cs,_isolate:_IRN-SisSh64	209001910R:1
LC066476.1_Cucumber_mosaic_virus_genomic_RNA,_segment:_3,cs,_isolate:_IRN-SisSh64	209001910R:31
LC066477.1_Cucumber_mosaic_virus_genomic_RNA,_segment:_1,cs,_isolate:_IRN-TIm1	209001910R:6
LC066480.1_Cucumber_mosaic_virus_genomic_RNA,_segment:_1,cs,_isolate:_IRN-TVRa26	209001910R:2
LC066486.1_Cucumber_mosaic_virus_genomic_RNA,_segment:_1,cs,_isolate:_IRN-WRN9	209001910R:16
LC066487.1_Cucumber_mosaic_virus_genomic_RNA,_segment:_2,cs,_isolate:_IRN-WRN9	209001910R:6
LC066489.1_Cucumber_mosaic_virus_genomic_RNA,_segment:_1,cs,_isolate:_IRN-WRN15	209001910R:11
LC066490.1_Cucumber_mosaic_virus_genomic_RNA,_segment:_2,cs,_isolate:_IRN-WRN15	209001910R:5
LC066491.1_Cucumber_mosaic_virus_genomic_RNA,_segment:_3,cs,_isolate:_IRN-WRN15	209001910R:1
LC066495.1_Cucumber_mosaic_virus_genomic_RNA,_segment:_1,cs,_isolate:_IRN-WRWA5	209001910R:2
LC066498.1_Cucumber_mosaic_virus_genomic_RNA,_segment:_1,cs,_isolate:_TUR4	209001910R:3
LC066499.1_Cucumber_mosaic_virus_genomic_RNA,_segment:_2,cs,_isolate:_TUR4	209001910R:1
LC066501.1_Cucumber_mosaic_virus_genomic_RNA,_segment:_1,cs,_isolate:_TUR54	209001910R:2
LC066502.1_Cucumber_mosaic_virus_genomic_RNA,_segment:_2,cs,_isolate:_TUR54	209001910R:1
LC066503.1_Cucumber_mosaic_virus_genomic_RNA,_segment:_3,cs,_isolate:_TUR54	209001910R:100
LC066504.1_Cucumber_mosaic_virus_genomic_RNA,_segment:_1,cs,_isolate:_TUR81	209001910R:1
LC066505.1_Cucumber_mosaic_virus_genomic_RNA,_segment:_2,cs,_isolate:_TUR81	209001910R:2
LC066506.1_Cucumber_mosaic_virus_genomic_RNA,_segment:_3,cs,_isolate:_TUR81	209001910R:24
LC066507.1_Cucumber_mosaic_virus_genomic_RNA,_segment:_1,cs,_isolate:_TUR83	209001910R:5
LC066508.1_Cucumber_mosaic_virus_genomic_RNA,_segment:_2,cs,_isolate:_TUR83	209001910R:2
LC066510.1_Cucumber_mosaic_virus_genomic_RNA,_segment:_1,cs,_isolate:_TUR84	209001910R:9
LC066511.1_Cucumber_mosaic_virus_genomic_RNA,_segment:_2,cs,_isolate:_TUR84	209001910R:5
LC066512.1_Cucumber_mosaic_virus_genomic_RNA,_segment:_3,cs,_isolate:_TUR84	209001898R:1
LC066513.1_Cucumber_mosaic_virus_genomic_RNA,_segment:_1,cs,_isolate:_TUR86	209001910R:10
LC066514.1_Cucumber_mosaic_virus_genomic_RNA,_segment:_2,cs,_isolate:_TUR86	209001910R:1
LC066516.1_Cucumber_mosaic_virus_genomic_RNA,_segment:_1,cs,_isolate:_TUR89	209001910R:14
LC066517.1_Cucumber_mosaic_virus_genomic_RNA,_segment:_2,cs,_isolate:_TUR89	209001910R:2
LC066518.1_Cucumber_mosaic_virus_genomic_RNA,_segment:_3,cs,_isolate:_TUR89	209001910R:1
LC195294.1_Pepper_cryptic_virus_2_RdRp_gene_for_putative_RNA-dependent_RNA_polymerase,_complete_cds,_isolate:_YY	209001896R:1	209001906R:2
LC339509.1_Cucumber_mosaic_virus_Ma-1_genomic_RNA,_segment:_RNA1,cs	209001910R:175
LC339511.1_Cucumber_mosaic_virus_Ma-1_genomic_RNA,_segment:_RNA3,cs	209001910R:11
LC363917.1_Cucumber_mosaic_virus_Co-46_genomic_RNA,_segment:_RNA1,cs	209001910R:19
LC363918.1_Cucumber_mosaic_virus_Co-46_genomic_RNA,_segment:_RNA2,cs	209001910R:15
LN824207.1_Human_herpesvirus_4_genome_assembly_pLCL-TRL1-pre,_segment_:_I	209001902R:1
LN824208.1_Human_herpesvirus_4_genome_assembly_Akata,_segment_:_I	209001902R:1
LN827555.1_Human_herpesvirus_4_genome_assembly_X50-7,_segment_:_I	209001902R:1
LN827575.1_Human_herpesvirus_4_genome_assembly_sLCL-IS1.14,_segment_:_I	209001902R:1
LN827578.1_Human_herpesvirus_4_genome_assembly_sLCL-IS1.13,_chromosome_:_I	209001902R:1
LN827799.1_Human_herpesvirus_4_genome_assembly_sLCL-IM1.16,_segment_:_I	209001902R:1
LS992243.1_Human_gammaherpesvirus_4_isolate_Human_herpesvirus_4_genome_assembly,_chromosome:_I	209001902R:1
LS992244.1_Human_gammaherpesvirus_4_isolate_Human_herpesvirus_4_genome_assembly,_chromosome:_I	209001902R:1
LT576867.1_Herpes_simplex_virus_(type_1_/_strain_17)_genome_assembly,_chromosome:_I	209001908R:2	209001909R:1	209001910R:1
LT576868.1_Herpes_simplex_virus_(type_1_/_strain_17)_genome_assembly,_chromosome:_I	209001903R:1	209001904R:1	209001908R:1	209001909R:1	209001910R:3
LT576869.1_Herpes_simplex_virus_(type_1_/_strain_17)_genome_assembly,_chromosome:_I	209001888R:1	209001908R:2	209001910R:5
LT576870.1_Herpes_simplex_virus_(type_1_/_strain_17)_genome_assembly,_chromosome:_I	209001903R:1	209001904R:1	209001908R:3	209001910R:3	209001911R:1
LT576871.1_Herpes_simplex_virus_(type_1_/_strain_17)_isolate_5B_genome_assembly,_chromosome:_I	209001904R:2	209001906R:1	209001908R:2	209001910R:3
LT594105.1_Human_herpesvirus_1_isolate_172_2010_genome_assembly,cg:_monopartite	209001887R:1	209001908R:1	209001910R:1
LT594106.1_Human_herpesvirus_1_isolate_2158_2007_genome_assembly,cg:_monopartite	209001908R:1	209001909R:1	209001910R:7	209001911R:1
LT594107.1_Human_herpesvirus_1_isolate_3083_2008_genome_assembly,cg:_monopartite	209001888R:1	209001908R:2	209001910R:9
LT594108.1_Human_herpesvirus_1_isolate_1319_2005_genome_assembly,cg:_monopartite	209001904R:4	209001906R:1	209001910R:3
LT594109.1_Human_herpesvirus_1_isolate_270_2007_genome_assembly,cg:_monopartite	209001904R:1	209001908R:2	209001910R:1	209001911R:1
LT594110.1_Human_herpesvirus_1_isolate_66_2007_genome_assembly,cg:_monopartite	209001887R:1	209001903R:1	209001904R:2	209001908R:2	209001909R:1	209001910R:2	209001911R:1
LT594111.1_Human_herpesvirus_1_isolate_1394_2005_genome_assembly,cg:_monopartite	209001903R:1	209001904R:1	209001908R:2	209001910R:7
LT594112.1_Human_herpesvirus_1_isolate_369_2007_genome_assembly,cg:_monopartite	209001904R:1	209001908R:2	209001910R:1
LT594192.1_Human_herpesvirus_1_isolate_160_1982_genome_assembly,cg:_monopartite	209001904R:1
LT594457.1_Human_herpesvirus_1_isolate_132_1998_genome_assembly,cg:_monopartite	209001901R:1	209001904R:1	209001908R:1	209001910R:3
LT608134.1_Herpes_simplex_virus_(type_1_/_strain_17)_genome_assembly,_chromosome:_I	209001887R:1	209001901R:1	209001904R:1	209001910R:3
M12737.1_Human_papillomavirus_type_8,cg	209001906R:1
M34077.1_Tobacco_mild_green_mosaic_virus,cg	209001896R:14	209001898R:2	209001900R:33	209001908R:13	209001912R:105
M37980.1_Avian_leukosis_virus_-_RSA,cg	209001904R:7
M58152.1_Apple_chlorotic_leaf_spot_virus,cg	209001896R:1
M81413.1_Pepper_mild_mottle_virus_strain_S_genomic_sequence	209001887R:1	209001894R:1	209001896R:39	209001898R:11	209001899R:2	209001900R:464	209001901R:1	209001902R:14	209001908R:212	209001910R:4	209001912R:186
MF001040.1_Human_respiratory_syncytial_virus_B_strain_6A10,cg	209001894R:22
MF001042.1_Human_respiratory_syncytial_virus_B_strain_6A6,cg	209001894R:24
MF001044.1_Human_respiratory_syncytial_virus_B_strain_6A8,cg	209001894R:23
MF001045.1_Human_respiratory_syncytial_virus_B_strain_6C3,cg	209001894R:20
MF001046.1_Human_respiratory_syncytial_virus_B_strain_6C5,cg	209001894R:39
MF001048.1_Human_respiratory_syncytial_virus_B_strain_8B3,cg	209001894R:61
MF001055.1_Human_respiratory_syncytial_virus_B_strain_8Q6,cg	209001894R:24
MF001058.1_Human_respiratory_syncytial_virus_B_strain_SC2935,cg	209001894R:71
MF588678.1_Betapapillomavirus_1_isolate_Beta01_m292c10,cg	209001902R:12	209001910R:4
MF588679.1_Betapapillomavirus_1_isolate_Beta01_w15c111,cg	209001910R:13
MF588710.1_Gammapapillomavirus_9_isolate_Gamma09_w11C39,cg	209001902R:12
MF588711.1_Gammapapillomavirus_9_isolate_Gamma09_w23c101c,cg	209001911R:1
MF588749.1_Gammapapillomavirus_24_isolate_Gamma24_w07c74b,cg	209001902R:8
MF973154.1_Human_respiratory_syncytial_virus_B_strain_7I8,cg	209001894R:48
MF973155.1_Human_respiratory_syncytial_virus_B_strain_5T9,cg	209001894R:24
MG025947.1_Cucumber_mosaic_virus_isolate_Rs_segment_RNA_1,cs	209001910R:9
MG182148.1_Cucumber_mosaic_virus_strain_K_2016_segment_RNA1,cs	209001910R:40
MG182149.1_Cucumber_mosaic_virus_strain_K_2016_segment_RNA2,cs	209001910R:63
MG182150.1_Cucumber_mosaic_virus_strain_K_2016_segment_RNA3,cs	209001910R:27
MG470798.1_Cucumber_mosaic_virus_isolate_R1_segment_RNA1_ORF1_gene,_complete_cds	209001910R:2
MG470799.1_Cucumber_mosaic_virus_isolate_R1_segment_RNA2_RNA-dependent_RNA_polymerase_and_2b_protein_genes,_complete_cds	209001910R:2	209001912R:1
MG470800.1_Cucumber_mosaic_virus_isolate_R1_segment_RNA3_3a_protein_gene,_partial_cds;_and_coat_protein_gene,_complete_cds	209001906R:1	209001910R:1
MG554632.1_Botrytis_cinerea_hypovirus_1,cg	209001896R:1
MG602507.1_UNVERIFIED:_Acanthamoeba_polyphaga_mimivirus,_partial_genome	209001897R:1	209001903R:1	209001910R:1
MG602508.1_UNVERIFIED:_Acanthamoeba_polyphaga_mimivirus,_partial_genome	209001889R:1	209001905R:1	209001906R:1	209001909R:1	209001910R:2
MG642025.1_Human_respiratory_syncytial_virus_B_strain_RSVB/Homo_sapiens/USA/MCRSV_232/1982,cg	209001894R:2
MG642027.1_Human_respiratory_syncytial_virus_B_strain_RSVB/Homo_sapiens/USA/MCRSV_275/1991,cg	209001894R:6
MG642036.1_Human_respiratory_syncytial_virus_B_strain_RSVB/Homo_sapiens/USA/MCRSV_271/1989,cg	209001894R:2
MG642037.1_Human_respiratory_syncytial_virus_B_strain_RSVB/Homo_sapiens/USA/MCRSV_208/1980,cg	209001894R:4
MG642039.1_Human_respiratory_syncytial_virus_B_strain_RSVB/Homo_sapiens/USA/MCRSV_268/1985,cg	209001894R:9
MG642042.1_Human_respiratory_syncytial_virus_B_strain_RSVB/Homo_sapiens/USA/MCRSV_242/1985,cg	209001894R:10
MG642043.1_Human_respiratory_syncytial_virus_B_strain_RSVB/Homo_sapiens/USA/MCRSV_228/1982,cg	209001894R:8
MG642044.1_Human_respiratory_syncytial_virus_B_strain_RSVB/Homo_sapiens/USA/MCRSV_231/1982,cg	209001894R:2
MG642045.1_Human_respiratory_syncytial_virus_B_strain_RSVB/Homo_sapiens/USA/MCRSV_205/1979,cg	209001894R:3
MG642046.1_Human_respiratory_syncytial_virus_B_strain_RSVB/Homo_sapiens/USA/MCRSV_239/1984,cg	209001894R:5
MG642047.1_Human_respiratory_syncytial_virus_B_strain_RSVB/Homo_sapiens/USA/MCRSV_213/1980,cg	209001894R:2
MG642049.1_Human_respiratory_syncytial_virus_B_strain_RSVB/Homo_sapiens/USA/MCRSV_278/1993,cg	209001894R:6
MG642051.1_Human_respiratory_syncytial_virus_B_strain_RSVB/Homo_sapiens/USA/MCRSV_249/1986,cg	209001894R:8
MG642053.1_UNVERIFIED:_Human_respiratory_syncytial_virus_B_strain_RSVB/Homo_sapiens/USA/MCRSV_210/1980_cRNA_sequence	209001894R:6
MG642054.1_Human_respiratory_syncytial_virus_B_strain_RSVB/Homo_sapiens/USA/MCRSV_276/1991,cg	209001894R:3
MG642057.1_Human_respiratory_syncytial_virus_B_strain_RSVB/Homo_sapiens/USA/MCRSV_241/1984,cg	209001894R:3
MG642059.1_Human_respiratory_syncytial_virus_B_strain_RSVB/Homo_sapiens/USA/MCRSV_267/1983,cg	209001894R:2
MG642062.1_Human_respiratory_syncytial_virus_B_strain_RSVB/Homo_sapiens/USA/MCRSV_282/1996,cg	209001894R:5
MG642064.1_Human_respiratory_syncytial_virus_B_strain_RSVB/Homo_sapiens/USA/MCRSV_280/1995,cg	209001894R:17
MG642065.1_Human_respiratory_syncytial_virus_B_strain_RSVB/Homo_sapiens/USA/MCRSV_225/1981,cg	209001894R:3
MG642066.1_Human_respiratory_syncytial_virus_B_strain_RSVB/Homo_sapiens/USA/MCRSV_273/1990,cg	209001894R:4
MG642068.1_Human_respiratory_syncytial_virus_B_strain_RSVB/Homo_sapiens/USA/MCRSV_252/1987,cg	209001894R:4
MG642072.1_Human_respiratory_syncytial_virus_B_strain_RSVB/Homo_sapiens/USA/MCRSV_274/1991,cg	209001894R:2
MG642076.1_Human_respiratory_syncytial_virus_B_strain_RSVB/Homo_sapiens/USA/MCRSV_251/1987,cg	209001894R:4
MG642078.1_Human_respiratory_syncytial_virus_B_strain_RSVB/Homo_sapiens/USA/MCRSV_230/1982,cg	209001894R:4
MG642082.1_Human_respiratory_syncytial_virus_B_strain_RSVB/Homo_sapiens/USA/MCRSV_257/1989,cg	209001894R:5
MG779341.1_Bandra_megavirus_isolate_KK-1_genomic_sequence	209001910R:1
NC_001354.1_Human_papillomavirus_type_41,cg	209001887R:1	209001902R:9	209001903R:1	209001904R:2	209001906R:1	209001908R:6	209001910R:4
NC_024307.1_Cynoglossus_semilaevis_isolate_Cse_v1.0_chromosome_1,_Cse_v1.0,wgss	209001891R:2
NC_024308.1_Cynoglossus_semilaevis_isolate_Cse_v1.0_chromosome_2,_Cse_v1.0,wgss	209001897R:11	209001905R:3	209001909R:1	209001910R:3
NC_024310.1_Cynoglossus_semilaevis_isolate_Cse_v1.0_chromosome_4,_Cse_v1.0,wgss	209001887R:3	209001889R:3	209001891R:21	209001893R:23	209001894R:6	209001897R:13	209001903R:31	209001905R:3	209001907R:6	209001910R:1	209001912R:1
NC_024311.1_Cynoglossus_semilaevis_isolate_Cse_v1.0_chromosome_5,_Cse_v1.0,wgss	209001888R:1	209001902R:1
NC_024316.1_Cynoglossus_semilaevis_isolate_Cse_v1.0_chromosome_10,_Cse_v1.0,wgss	209001891R:1	209001899R:1
NC_024318.1_Cynoglossus_semilaevis_isolate_Cse_v1.0_chromosome_12,_Cse_v1.0,wgss	209001902R:14
NC_024319.1_Cynoglossus_semilaevis_isolate_Cse_v1.0_chromosome_13,_Cse_v1.0,wgss	209001890R:14
NC_024320.1_Cynoglossus_semilaevis_isolate_Cse_v1.0_chromosome_14,_Cse_v1.0,wgss	209001906R:3	209001912R:1
NC_024321.1_Cynoglossus_semilaevis_isolate_Cse_v1.0_chromosome_15,_Cse_v1.0,wgss	209001893R:1	209001903R:1
NC_024322.1_Cynoglossus_semilaevis_isolate_Cse_v1.0_chromosome_16,_Cse_v1.0,wgss	209001902R:17	209001912R:1
NC_024323.1_Cynoglossus_semilaevis_isolate_Cse_v1.0_chromosome_17,_Cse_v1.0,wgss	209001907R:1
NC_024324.1_Cynoglossus_semilaevis_isolate_Cse_v1.0_chromosome_18,_Cse_v1.0,wgss	209001912R:1
NC_024325.1_Cynoglossus_semilaevis_isolate_Cse_v1.0_chromosome_19,_Cse_v1.0,wgss	209001906R:2	209001912R:2
NC_024327.1_Cynoglossus_semilaevis_isolate_Cse_v1.0_chromosome_W,_Cse_v1.0,wgss	209001887R:1	209001889R:1	209001901R:2	209001910R:19	209001912R:1
NC_024328.1_Cynoglossus_semilaevis_isolate_Cse_v1.0_chromosome_Z,_Cse_v1.0,wgss	209001889R:1	209001894R:1	209001900R:1	209001905R:8	209001909R:8	209001910R:4
NC_030848.1_Haloarcula_californiae_icosahedral_virus_1,cg	209001909R:1	209001910R:5
NC_045512.2_Wuhan_seafood_market_pneumonia_virus_isolate_Wuhan-Hu-1,cg	209001887R:3678	209001888R:1557	209001889R:4876	209001890R:8	209001891R:1	209001892R:5	209001893R:418	209001894R:3	209001895R:47	209001896R:3	209001897R:815	209001898R:544	209001899R:96	209001900R:2	209001901R:6	209001902R:27447	209001903R:2616	209001904R:7258	209001905R:449	209001906R:442	209001908R:3079	209001909R:8590	209001910R:38	209001912R:1	back
NW_007585112.1_Cynoglossus_semilaevis_isolate_Cse_v1.0_unplaced_genomic_scaffold,_Cse_v1.0_scaffold1699,wgss	209001887R:4	209001889R:2	209001893R:1	209001902R:2	209001905R:1	209001906R:6	209001908R:5	209001909R:2	209001910R:109
NW_007587064.1_Cynoglossus_semilaevis_isolate_Cse_v1.0_unplaced_genomic_scaffold,_Cse_v1.0_scaffold5878,wgss	209001887R:6	209001888R:5	209001889R:30	209001890R:10	209001893R:11	209001894R:1	209001896R:601	209001898R:824	209001899R:817	209001900R:312	209001901R:46	209001902R:8	209001903R:2	209001904R:16	209001905R:28	209001906R:631	209001907R:54	209001908R:10	209001909R:4	209001910R:446	209001911R:2	209001912R:3765	back
NW_007591416.1_Cynoglossus_semilaevis_isolate_Cse_v1.0_unplaced_genomic_scaffold,_Cse_v1.0_scaffold6273,wgss	209001887R:10	209001888R:1	209001889R:40	209001890R:11	209001891R:2	209001893R:10	209001894R:1	209001896R:239	209001898R:324	209001899R:221	209001900R:97	209001901R:45	209001902R:19	209001903R:3	209001904R:14	209001905R:26	209001906R:340	209001907R:24	209001908R:32	209001909R:6	209001910R:562	209001911R:4	209001912R:656	back
NW_007592389.1_Cynoglossus_semilaevis_isolate_Cse_v1.0_unplaced_genomic_scaffold,_Cse_v1.0_scaffold6853,wgss	209001887R:35	209001888R:23	209001889R:264	209001890R:32	209001893R:107	209001894R:3	209001895R:1	209001896R:1192	209001897R:1	209001898R:1091	209001899R:700	209001900R:1946	209001901R:159	209001902R:86	209001903R:24	209001904R:65	209001905R:281	209001906R:7651	209001907R:284	209001908R:152	209001909R:25	209001910R:7421	209001911R:92	209001912R:5513	back
NW_007601119.1_Cynoglossus_semilaevis_isolate_Cse_v1.0_unplaced_genomic_scaffold,_Cse_v1.0_scaffold5982,wgss	209001890R:1	209001902R:42	209001904R:6	209001905R:2	209001911R:1
NW_007607112.1_Cynoglossus_semilaevis_isolate_Cse_v1.0_unplaced_genomic_scaffold,_Cse_v1.0_C18367692,wgss	209001887R:3	209001902R:3	209001903R:1	209001904R:1	209001906R:3	209001908R:5	209001909R:1
NW_007611309.1_Cynoglossus_semilaevis_isolate_Cse_v1.0_unplaced_genomic_scaffold,_Cse_v1.0_C18262943,wgss	209001887R:6	209001889R:9	209001893R:2	209001896R:5	209001897R:1	209001898R:2	209001899R:3	209001900R:5	209001901R:6	209001902R:18	209001903R:3	209001904R:14	209001905R:6	209001906R:12	209001908R:27	209001909R:7	209001910R:306	209001912R:8
NW_007613073.1_Cynoglossus_semilaevis_isolate_Cse_v1.0_unplaced_genomic_scaffold,_Cse_v1.0_scaffold4369,wgss	209001889R:2	209001908R:41
U16304.1_Citrus_tristeza_virus_complete_genome	209001890R:49	209001898R:24
U20219.1_Cucumber_mosaic_virus_3a_protein_and_capsid_protein_genes,_complete_cds	209001910R:79
U20220.1_Cucumber_mosaic_virus_1a_protein_gene,_complete_cds	209001910R:61
U31787.1_Human_papillomavirus_type_38,cg	209001887R:4	209001908R:3
U60315.1_Molluscum_contagiosum_virus_subtype_1,cg	209001887R:19	209001888R:1	209001889R:2	209001890R:2	209001893R:1	209001894R:1	209001896R:1	209001902R:285	209001903R:3	209001904R:23	209001906R:4	209001907R:1	209001908R:59	209001909R:2	209001910R:107	209001911R:6
U89243.1_Garlic_virus_X,cg	209001906R:2
V01408.1_Tobacco_mosaic_virus_genome_(variant_1)	209001887R:3	209001900R:1	209001906R:17
X14112.1_Human_herpesvirus_1_complete_genome	209001908R:1	209001909R:1	209001910R:1
X56147.1_Human_papillomavirus_type_41	209001902R:5	209001903R:1	209001904R:5	209001906R:3	209001908R:4	209001910R:6
X70827.1_Human_papillomavirus_type_4_complete_genome	209001887R:2	209001902R:34	209001903R:1	209001906R:4	209001907R:1	209001911R:2	209001912R:1
X74465.1_Human_papillomavirus_type_10_genomic_DNA	209001902R:1	209001909R:1	209001911R:2
Y15173.1_Human_papillomavirus_type_75_E6,_E7,_E1,_E2,_E4,_L2,_and_L1_genes	209001908R:10	209001910R:5	209001911R:1
